# Supplementary material
Source: PubMed Central journal article supplement (PMC6590059)
Supplement: NIHMS1529825-supplement-1.pdf [file NIHMS1529825-supplement-1.pdf]

## Online Appendix

This appendix has been provided by the authors to give readers additional information about their work.

Supplement to: Zeng L, Talukdar H, Koplev S, Giannarelli<sup>3</sup> C et al. **Contribution of Regulatory-Gene Networks to Coronary Artery Disease Heritability**, manuscript

## Online Appendix

### Major Contribution of Regulatory-Gene Networks to Coronary Artery Disease Heritability

Lingyao Zeng; Husain Talukdar, PhD; Simon Koplev, Chiara Giannarelli PhD, MD, Torbjörn Ivert, MD, PhD; Li-Ming, Gan, MD, PhD; Arno Ruusalepp, MD, PhD; Eric E Schadt, PhD; Jason C. Kovacic, MD, PhD; Aldons J. Lusk PhD; Tom Michael, PhD; Heribert Schunkert, MD, PhD; Johan LM Björkegren, MD, PhD

Addresses for Correspondence:

Johan LM Björkegren, MD, PhD  
Department of Genetics and Genomic Sciences  
Icahn Institute for Genomics and Multiscale Biology  
Icahn School of Medicine at Mount Sinai  
One Gustave L. Levy Place - Box 1498  
New York, NY 10029-6574  
Tel: 001-917-580-2097  
[johan.bjorkegren@mssm.edu](mailto:johan.bjorkegren@mssm.edu)

Heribert Schunkert, MD  
Klinik für Herz- und Kreislauferkrankungen  
Deutsches Herzzentrum München  
Technische Universität München  
Lazarettstraße 36  
80636 München  
Tel: 0049-89-1218-4073  
[schunkert@dhm.mhn.de](mailto:schunkert@dhm.mhn.de)

#### Table of Contents:

|                     |                                                                                                                                                                                 |
|---------------------|---------------------------------------------------------------------------------------------------------------------------------------------------------------------------------|
| <b>Page 3</b>       | <b>Acknowledgement of Sources of Funding for Study Cohorts</b>                                                                                                                  |
| <b>Page 4</b>       | <b>Online Methods</b>                                                                                                                                                           |
| <b>Page 5</b>       | <b>Online Figure 1.</b> Schematic illustration of conceivable interactions between genetic and environmental factors at the molecular level.                                    |
| <b>Page 6</b>       | <b>Online Figure 2.</b> Comparison of CAD heritability assessments from common CAD risk loci using the methods based on individual, versus the summary, statistic genotype data |
| <b>Page 7</b>       | <b>Online Figure 3:</b> Replication of the STAGE CAD networks in STARNET                                                                                                        |
| <b>Page 8-25</b>    | <b>Online Figure 4:</b> Tissue-specific Regulatory Gene Networks Contributing to CAD Heritability                                                                               |
| <b>Page 26-35</b>   | <b>Online Figure 5:</b> Cross-tissue Regulatory Gene Networks Contributing to CAD Heritability                                                                                  |
| <b>Page 36</b>      | <b>Online Table 1.</b> DNA Genotyping Platforms of Study Cohorts                                                                                                                |
| <b>Page 36</b>      | <b>Online Table 2.</b> GWA lead SNP and STAGE/STARNET network heritability contributions                                                                                        |
| <b>Page 37</b>      | <b>Online Table 3.</b> Top-28 module eQTL $H^2$ contributions                                                                                                                   |
| <b>Page 38</b>      | <b>Online Table 4.</b> Top-28 module characteristics                                                                                                                            |
| <b>Page 39</b>      | <b>Online Table 5.</b> Top-28 module gene ontology                                                                                                                              |
| <b>Page 40 -107</b> | <b>Online Table 6.</b> Top-28 module gene IDs and characteristics                                                                                                               |
| <b>Page 108</b>     | <b>Online References</b>                                                                                                                                                        |

## Acknowledgement of Sources of Funding for Study Cohorts

All\_modules

### The **Stockholm Atherosclerosis Gene Expression (STAGE)** study

This work was supported by the Swedish Heart-Lung Foundation, the Swedish Research Council, the King Gustaf V and Queen Victoria's Foundation of Freemasons, the Astra-Zeneca Translational Science Centre-Karolinska Institutet, the Biotechnology and Biological Sciences Research Council (BBSRC, BB/J004235/1 and BB/M020053/1). Clinical Gene Networks AB (CGN) supported this work as a small and medium-sized enterprise (SME) of the EU FP6/FP7 project CVgenes@target (HEALTH-F2-2013-601456).

### The **Stockholm-Tartu Atherosclerosis Reverse Network Engineering Task (STARNET)** study

The STARNET study was supported by the University of Tartu (SP1GVARENG), the Estonian Research Council (ETF grant 8853), the Astra-Zeneca Translational Science Centre-Karolinska Institutet (a joint research program in translational science), Clinical Gene Networks AB (CGN) as an SME of the FP6/FP7 EU-funded integrated project CVgenes@target (HEALTH-F2-2013-601456), the Leducq transatlantic networks, CAD Genomics, Sphingonet, the Torsten and Ragnar Söderberg Foundation, the Knut and Alice Wallenberg Foundation, the American Heart Association (A14SFRN20840000, the National Institutes of Health (NIH NHLBI R01HL125863; NIH NHLBI R01HL71207; R01AG050986; NIH NHLBI K23HL111339; NIH NHLBI K08HL111330). The DNA genotyping and RNA sequencing were in part performed by the SNP&SEQ technology platform at Science for Life Laboratory the National Genomics Infrastructure (NGI) in Uppsala and Stockholm supported by the Swedish Research Council (VR-RF1), the Knut and Alice Wallenberg Foundation, and Uppsala Multidisciplinary Center for Advanced Computational Science (UPPMAX). CGN has financially contributed to the STARNET study. This work was supported in part through the computational resources and staff expertise provided by Scientific Computing at the Icahn School of Medicine at Mount Sinai. The STARNET data is accessible through the Database of Genotypes and Phenotypes (dbGAP).

### The **Genome-Wide Association (GWA)** studies

This work was funded by the Deutsche Forschungsgemeinschaft (DFG) as part of the Sonderforschungsbereich CRC 1123 (B02). This study was also supported by grants from the Fondation Leducq (CADgenomics: Understanding CAD Genes, 12CVD02), the German Federal Ministry of Education and Research (BMBF) within the framework of the e:Med research and funding concept (*e:AtheroSysMed*, grant 01ZX1313A-2014), and the European Union Seventh Framework Programme FP7/2007-2013 under grant agreement n° HEALTH-F2-2013-601456 (*CVgenes-at-target*). All GWA studies were approved by their local Ethical Committees. In the GerMIF studies, Cardiogenics, WTCCC, and MIGen, information on CAD manifestation was validated by medical records. The assessment of CAD is described in detail in the respective references.

## Online Methods

All\_modules

### Preprocessing of individual genotype data of the GWA studies

Genotype data from each of the nine GWA studies were first processed separately under strict quality control followed by imputation for all nine studies combined. Quality control at the genotype level included individual call rate  $\geq 0.98$ , SNP call rate  $> 0.98$ , minor allele frequency  $> 0.01$ , concordant recorded and genotype-derived gender, population outliers excluded (deviate beyond mean  $\pm 5 \times \text{SD}$  for top two principal components), IBD PI\_HAT  $< 0.125$  (individuals distant away than third-degree relatives), heterozygosity rate within mean  $\pm 3 \times \text{SD}$ , and deviation from Hardy-Weinberg equilibrium  $P > 1e-6$ . After genotype quality control, haplotypes were pre-phased from genotypes with the SHAPEIT2 haplotype estimation tool to generate the best-guess haplotypes based on the given genotypes. The best-guess haplotypes were forwarded to IMPUTE2 for imputation. The reference panel for imputation was The 1000 Genomes Phase I integrated variant (v3) set released in NCBI build 37 (hg19) coordinates with reference data from March 2012 (updated August 2012). The post-imputation quality control criteria were SNP call rate  $> 0.98$ , mean allele frequency  $> 0.05$ , Hardy-Weinberg  $P > 1e-5$ . SNPs that met these criteria and were consistently represented across studies were merged for all studies, resulting in pooled data from 27,376 individuals. Data for WTCCC and Cardiogenics were from the Leducq network “CADgenomics” (<https://www.fondationleducq.org/network/understanding-coronary-artery-disease-genes/>). Individual statistics are summarized below; cohort descriptions and more detailed assessment of CAD may be found in the corresponding references.

### Preprocessing of RNA Seq data from STARNET

Multi-tissue STARNET RNAseq data were aligned to GRCh38 and counted at the exon level as described<sup>1</sup> Gene counts were normalized for library size with DESeq2<sup>2</sup> and adjusted for age, gender, read length, RNA extraction protocol, flow cell, laboratory, and four surrogate variables<sup>3</sup> using L2-penalized regression and a regularization parameter of 1.0. Independent flow cell factors were constructed by singular value decomposition; eigenvectors with eigenvalues above 4.0 were retained.

### Comparing the multifactorial liability threshold and the restricted maximum likelihood models in assessing heritability

In the two most recent GWA studies, CAD heritability of identified genetic loci assessed with the multifactorial liability threshold model was  $\sim 22\%$  (assuming 40% inherited CAD variance).<sup>4,5</sup> In both studies, heritability was estimated from summary statistics, and the effect size of each lead SNP/locus was added up.<sup>4,5</sup> Thus, each risk locus was assumed to contribute to CAD heritability with independent effect sizes. However, in assessing heritability contributions from more diverse sets of SNPs (such as eSNPs of network genes), such SNPs, particularly those in close proximity, may be in LD and thus have dependent effect sizes. To accurately assess independent effect sizes of larger groups of SNPs that may be in LD, we used the REML method,<sup>6</sup> which requires individual genotype data. Reassuringly when applied to lead SNPs in loci identified by recent GWA studies of CAD,<sup>4,5</sup> this method yielded assessments of heritability contributions similar to those obtained with the multifactorial liability threshold model used in those studies (Supplementary Figure 2).

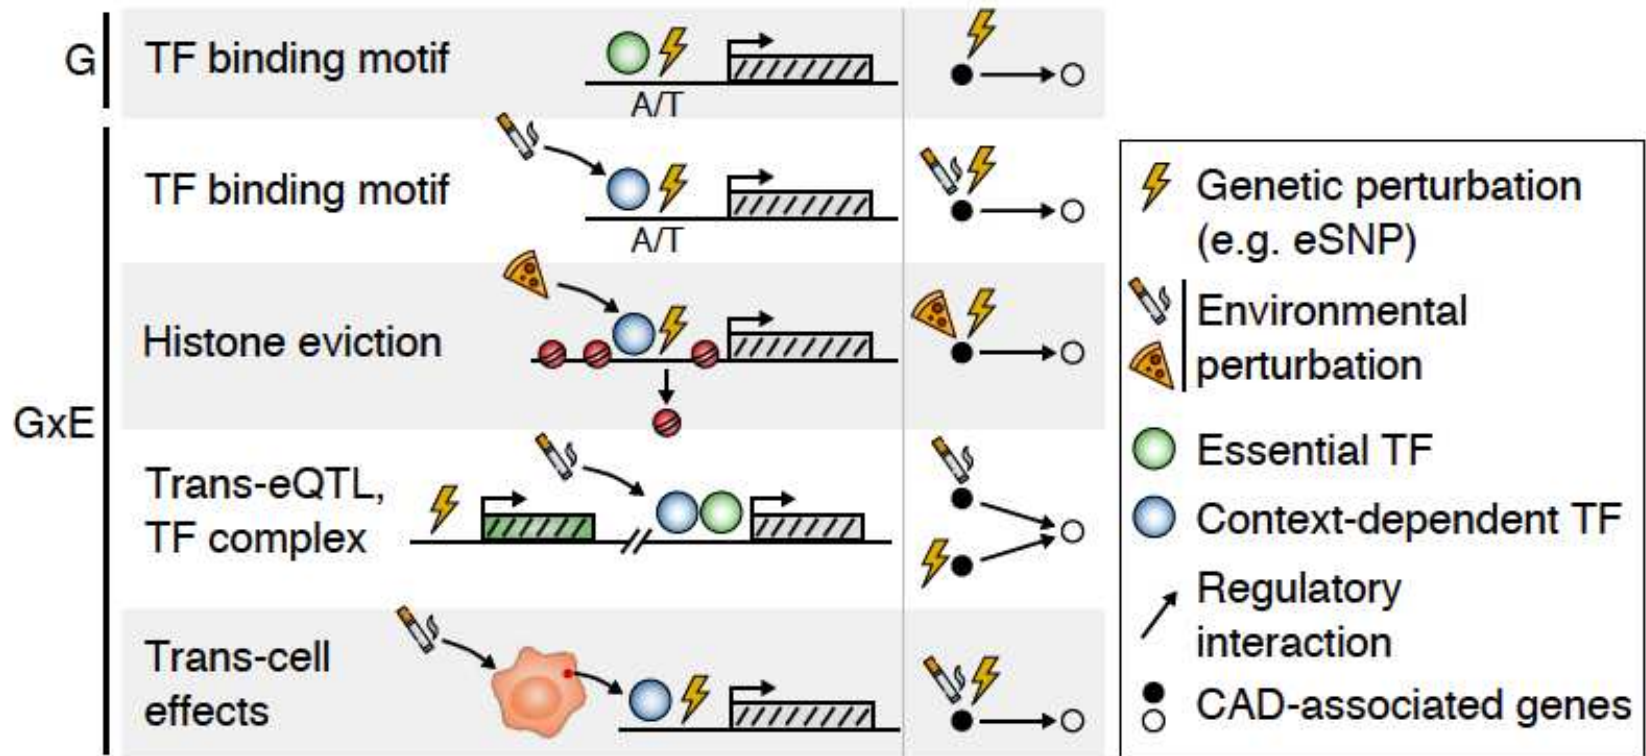

**Online Figure 1. Schematic illustration of conceivable interactions between genetic and environmental factors at the molecular level.** Examples of how environmental factors can interact with transcriptional factors to alter gene regulation at the molecular level. G, genetic risk variant; E, environmental risk factor; GxE, G/E interactions;  $H^2$ , broad sense heritability; TF, transcription factor

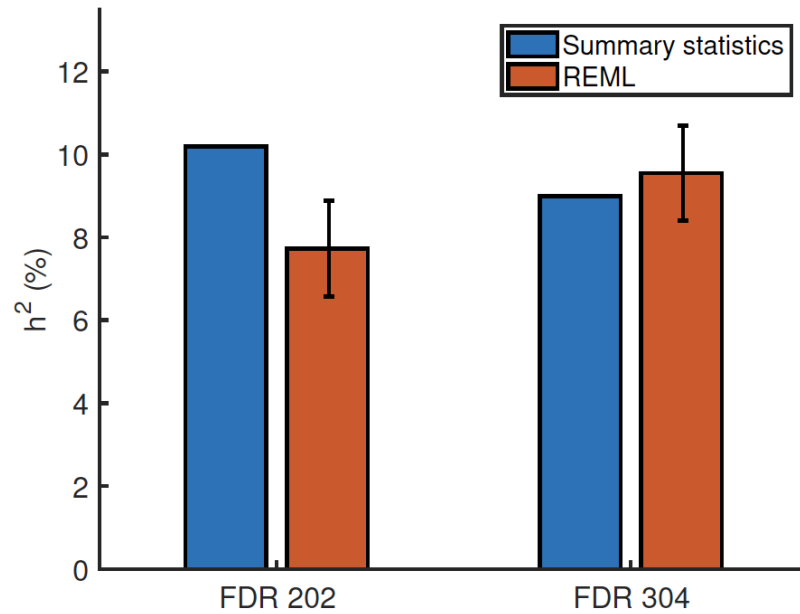

**Online Figure 2. Comparison of CAD heritability assessments from common CAD risk loci using the methods based on individual, versus the summary, statistic genotype data.** Bar plots representing the relative contributions to CAD heritability ( $h^2$ ) from the 302 and 202 FDR loci identified in recent GWA studies using the traditional multifactorial liability threshold model based on summary statistics data (red)<sup>4,5</sup> and REML based on individual-level genotype data (blue).  $h^2$  error bars for REML are standard error of mean; no error estimates are available for summary statistics

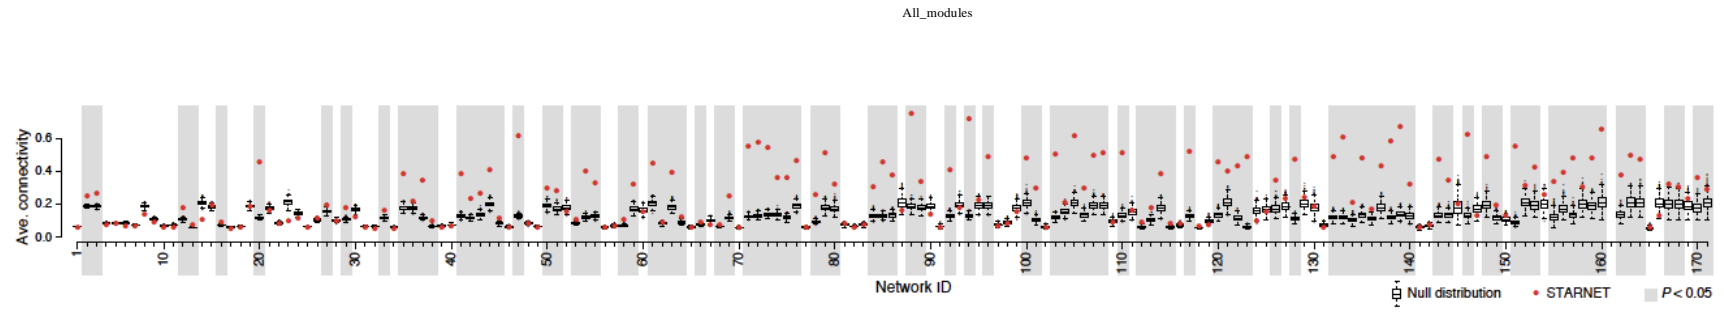

**Online Figure 3. Reproducibility of STAGE networks in STARNET RNA-seq data assessed by permutation tests.** The average connectivity (absolute Pearson's correlation) is compared to a null distribution for genes matched for tissue and RNA categories such as protein-coding and lincRNA. In total, 98 out of 171 co-expression network modules were validated, showing significantly higher connectivity than expected at random ( $P < 0.05$ ).

**Online Figure 4.** Shown are 18 tissue-specific (>95 % of nodes from <sup>All modules</sup> one tissue) regulatory gene networks (**A-R**) with key disease drivers that were originally identified in the STAGE study<sup>7</sup> and replicated in the STARNET study<sup>1</sup> with contributions to CAD heritability >0.2% per network.



## Regulatory Gene Network 2

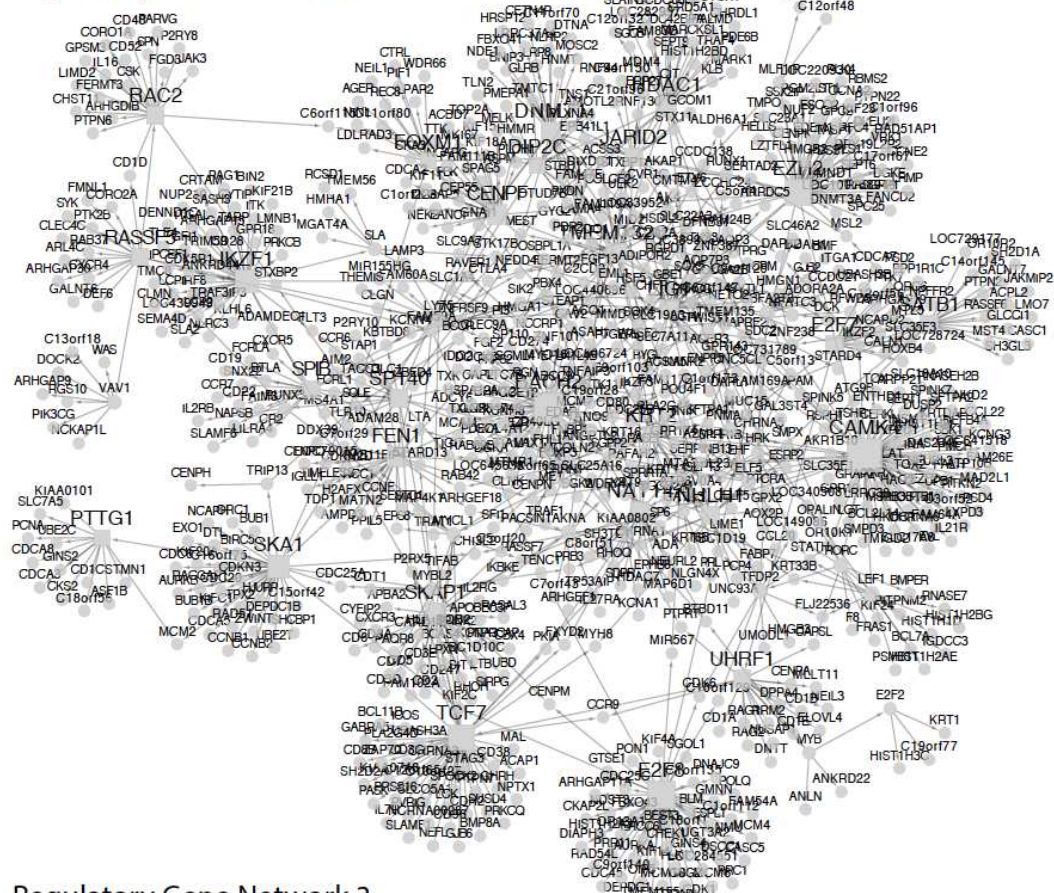

## Regulatory Gene Network 3

- A. Regulatory Gene Network, ID 2.** A visceral abdominal fat network, with 841 genes and 28 key disease drivers, that contributes to 1.82% of CAD heritability (beyond that of genome-wide significant and FDR loci identified by previous CAD GWA studies). According to gene ontology (GO), this network is enriched for genes involved in the cell cycle ( $P < 1.02e^{-33}$ ) and associated with degree of coronary atherosclerosis in CAD patients of the STAGE study ( $P < 0.02$ ). eSNPs of these network genes are enriched for association with plasma levels of HDL (2.64 fold,  $P < 2.09e^{-14}$ ). This network contain the following GWA candidate genes; COL4A1 (for CAD), PBX4 (for plasma levels of total cholesterol and LDL), KANK2 (HDL), UBASH3B (HDL and total cholesterol) and A2ML1, FAM117B (total cholesterol). Other GWA candidate genes are AMPD3, CR2, KIF11, IKZF1, MSR3, PLS1, PRC1, RASGRP1 and SYK. A total of 33 % of the network genes have in some fashion been associated with CAD or atherosclerosis in previous studies





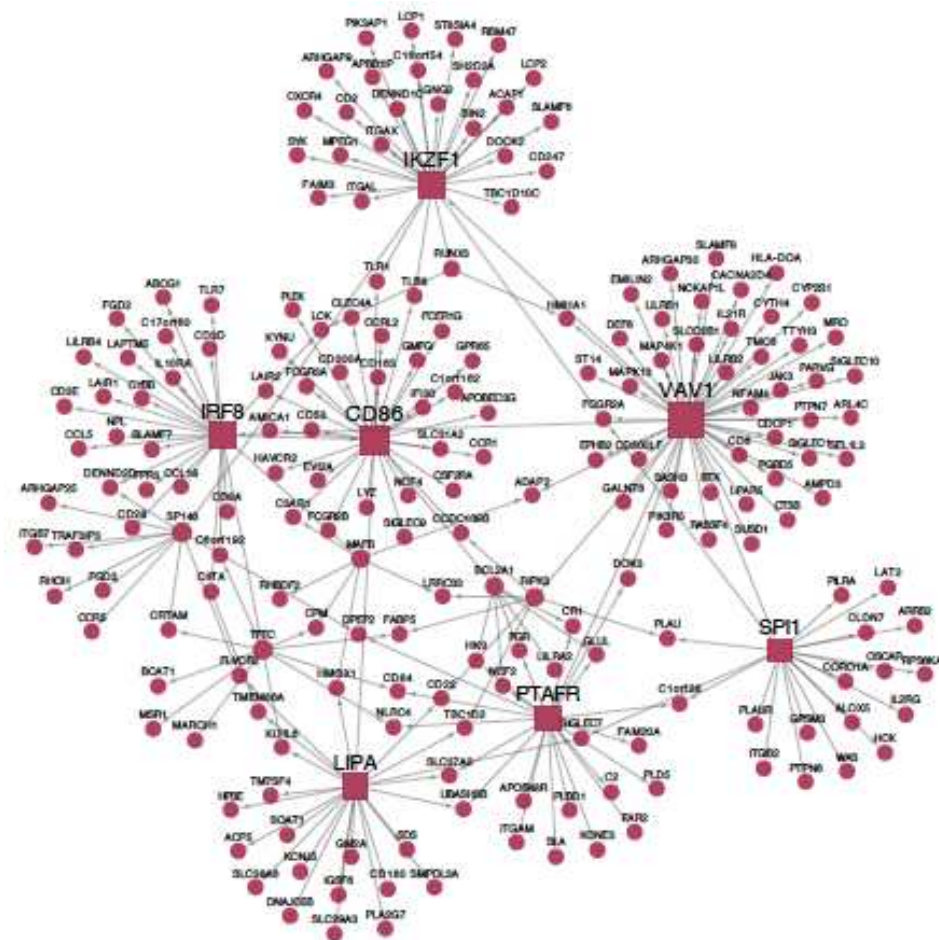

**C. Regulatory Gene Network, ID 20.** An atherosclerotic aortic wall network with 205 genes and 7 key disease drivers, that contributes to **0.25%** of CAD heritability (beyond that of genome-wide significant and FDR loci identified by previous CAD GWA studies). According to GO, this network is highly enriched for genes involved in immune responses ( $P < 7.88e^{-30}$ ). The network genes are also found to be associated with levels of plasma LDL in the CAD patients of the STAGE study ( $P < 0.01$ ) and in the Hybrid Mouse Diversity Panel (HMDP) <sup>8</sup> ( $P < 0.0006$ ). This network also contains the following GWA candidate genes; *LIPA* (CAD), *MAFB* (LDL) and *ALOX5*, *LILRB22*, *UBASH3B* (HDL and pro-insulin). Other GWA candidate genes are *AMPD3*, *LILRB2*, *MRCH1* and *IK2F1*. A total of 49 % of the genes in this network have in some fashion been associated with CAD or atherosclerosis in previous studies ( $P < 2.08e^{-12}$ ).<sup>7</sup>

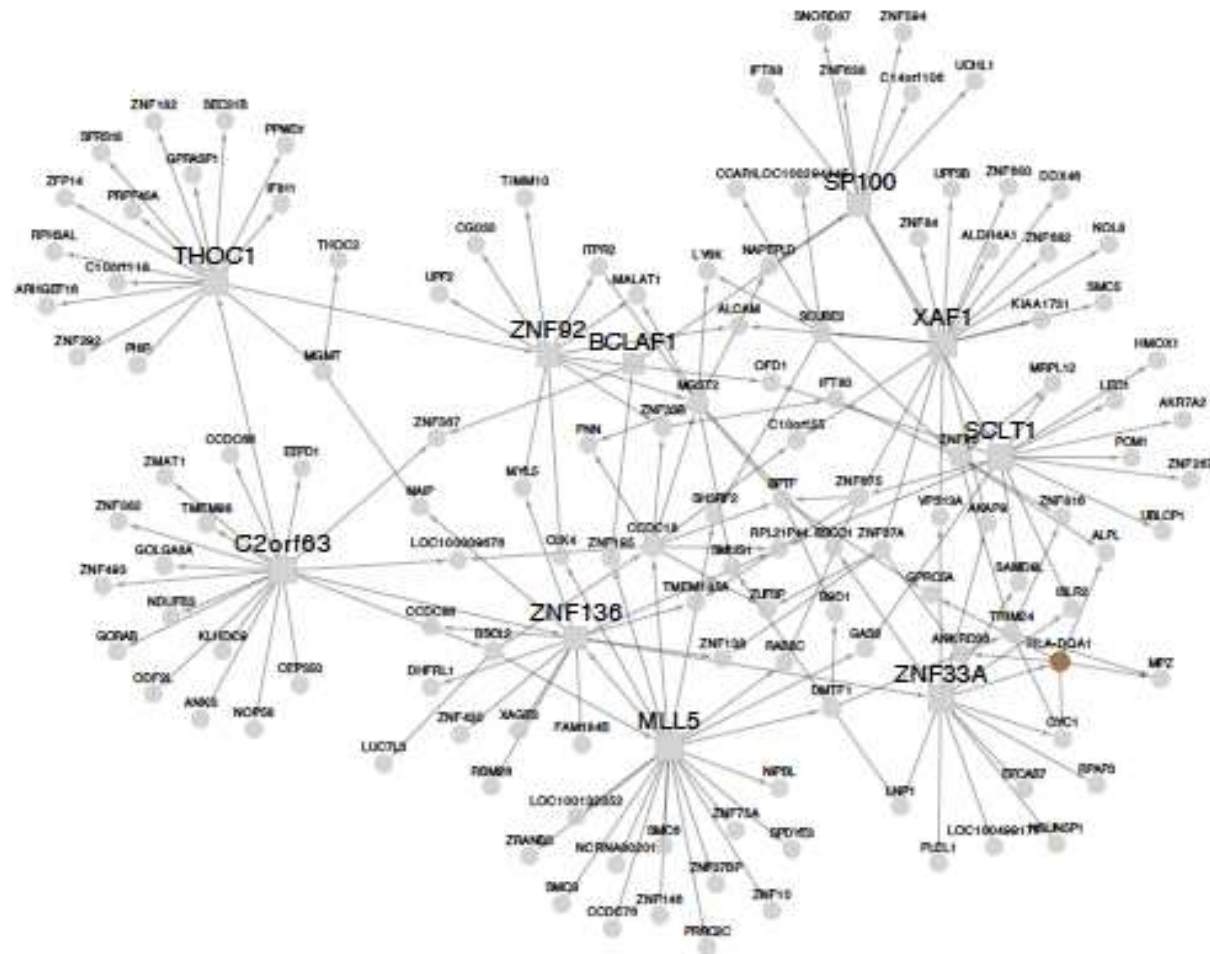

**D. Regulatory Gene Network, ID 35 (also in Figure 5).** A visceral abdominal fat network with 139 genes and 10 key disease drivers, that contributes to **0.57%** of CAD heritability (beyond that of genome-wide significant and FDR loci identified by previous CAD GWA studies). According to GO, this network is enriched for genes involved in RNA metabolic processes ( $P < 1.17e^{-7}$ ). The network genes are also associated with levels of plasma LDL in the CAD patients of the STAGE study ( $P < 0.01$ ) and in the HMDP<sup>8</sup> ( $P < 0.003$ ). eSNPs in this network's genes are strongly enriched for associations with plasma levels of LDL, HDL and pro-insulin (4.53 fold,  $P < 1.99e^{-117}$ , 2.81 fold,  $P < 8.93e^{-33}$ , 4.02 fold,  $P < 3.75e^{-84}$ , respectively) according to corresponding GWA studies<sup>7</sup>. There was no significant enrichment with genes that have been associated with CAD or atherosclerosis in previous studies ( $P > 0.05$ ).<sup>7</sup>

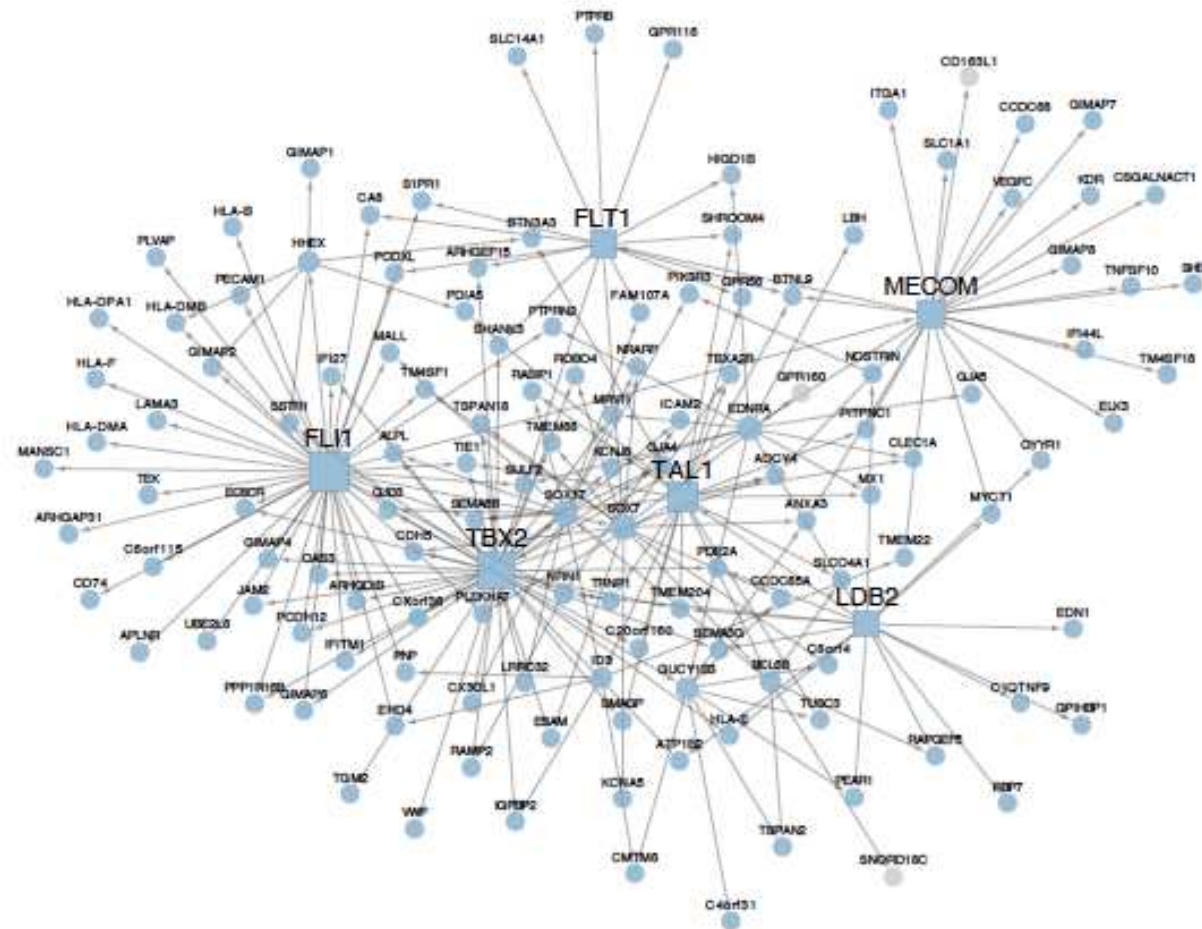

**E. Regulatory Gene Network, ID 36.** A skeletal muscle network with 137 genes and 6 key disease drivers, that contributes to **0.24%** of CAD heritability (beyond that of genome-wide significant and FDR loci identified by previous CAD GWA studies). According to GO, this network is enriched for genes involved in vascular development ( $P < 2.45e^{-13}$ ). The network genes are also associated with levels of plasma total cholesterol, fasting glucose and C-reactive protein (CRP) in the CAD patients of the STAGE study ( $P < 0.0006$ ,  $P < 0.02$  and  $P < 0.05$ , respectively). This network also contains the following GWA candidate genes; *GUCY1B3*, *FLT1* and *EDNRA* (CAD) and *SOX17* (for total cholesterol and LDL). A total of 38 % of the genes in this network have in some fashion been associated with CAD or atherosclerosis in previous studies ( $P > 0.002$ ).<sup>7</sup>

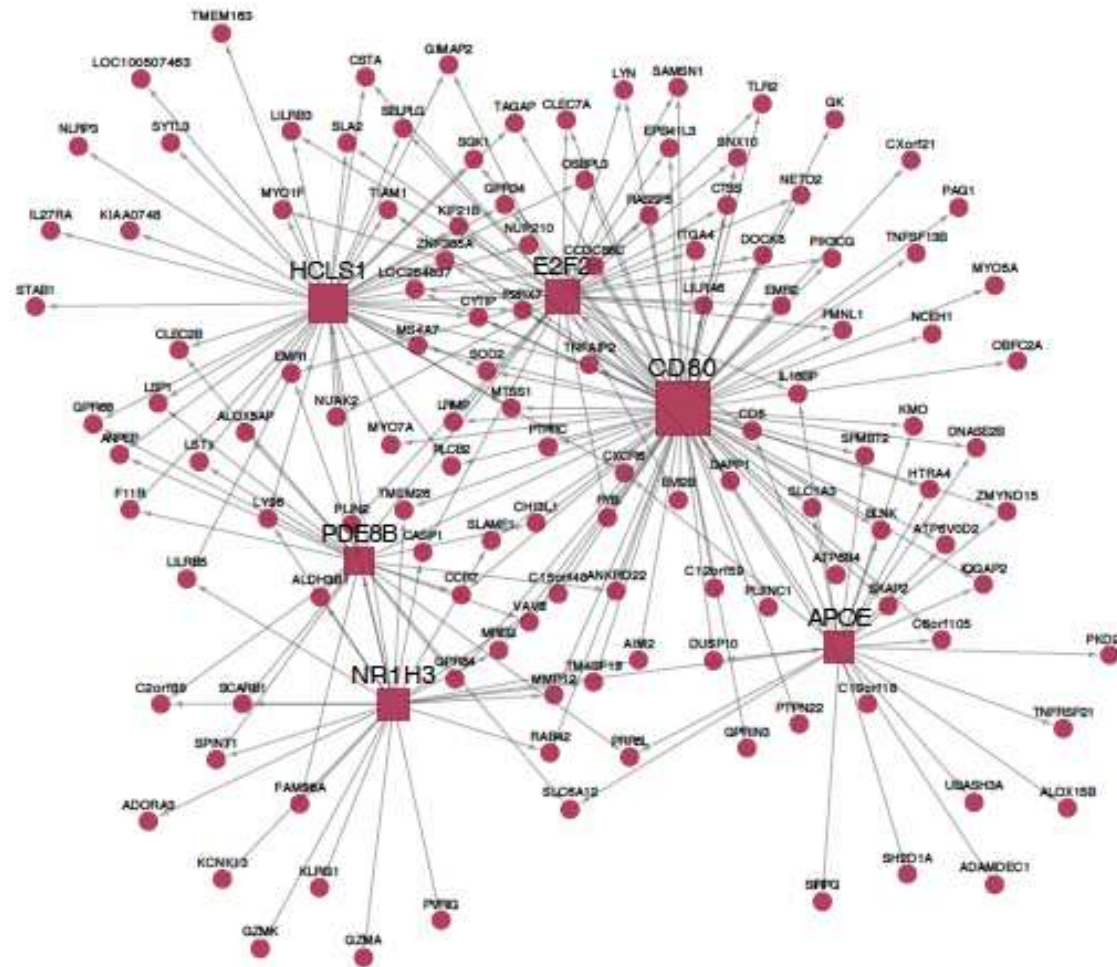

**F. Regulatory Gene Network, ID 37.** An atherosclerotic aortic wall network with 131 genes and 6 key disease drivers, that contributes to **0.26%** of CAD heritability (beyond that of genome-wide significant and FDR loci identified by previous CAD GWA studies). According to GO, this network is enriched for genes involved in cell communication ( $P < 1.04e^{-11}$ ). The network genes are also associated with levels of plasma LDL and degree of coronary atherosclerosis in the CAD patients of the STAGE study ( $P < 0.02$  and  $P < 0.01$ ). This network also contains the following GWA candidate genes; *APOE* (CAD, LDL and HDL) and *SCARB1*, *NRIH3* and *STAB1* (HDL). A total of 40 % of the genes in this network have in some fashion been associated with CAD or atherosclerosis in previous studies ( $P > 0.00003$ ).<sup>7</sup>



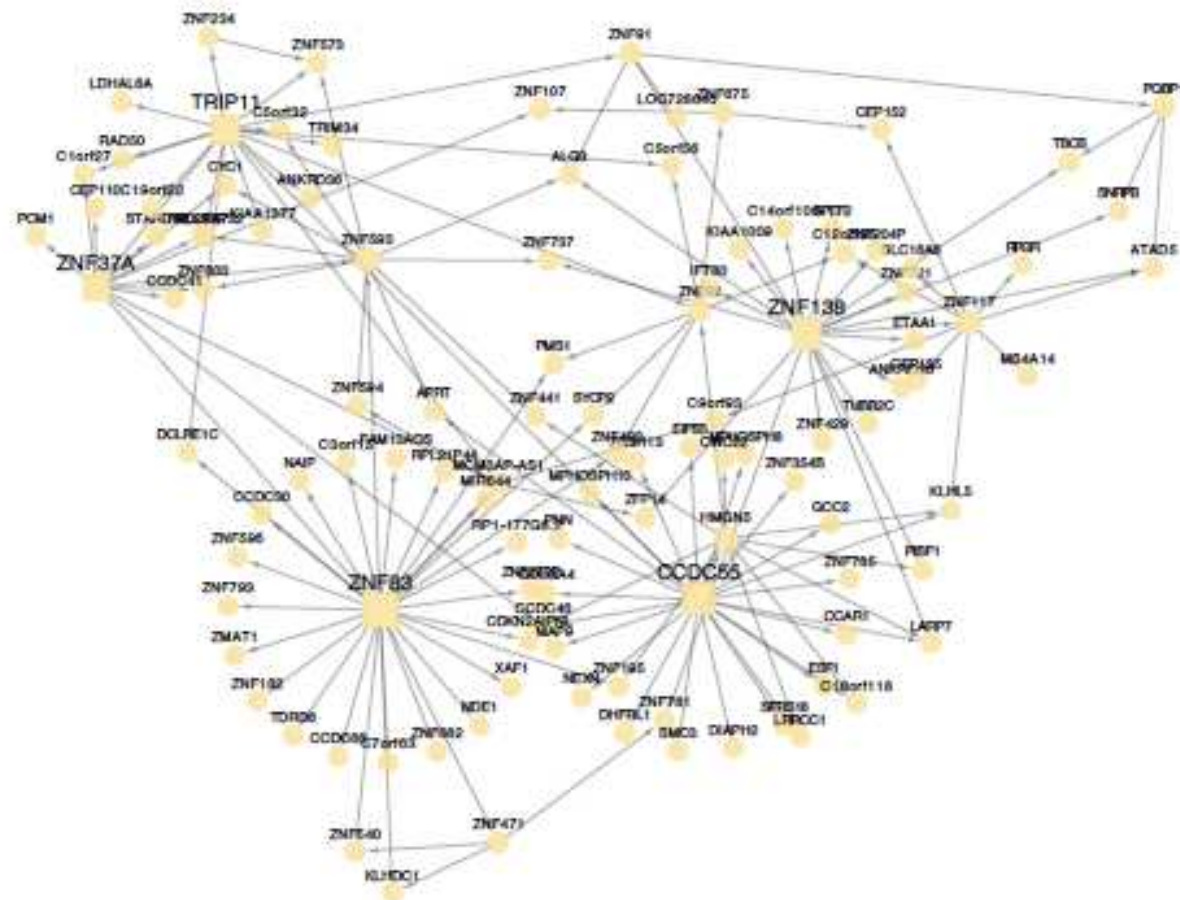

**G. Regulatory Gene Network, ID 41 (also in Figure 4A).** A none-(or early) atherosclerotic arterial wall network with 121 genes and 5 key disease drivers, that contributes to **0.64%** of CAD heritability (beyond that of genome-wide significant and FDR loci identified by previous CAD GWA studies). According to GO, this network is enriched for genes involved in RNA metabolic process ( $P < 1.04e^{-10}$ ). The network genes are also associated with levels of plasma glucose and HDL and degree of coronary atherosclerosis in the CAD patients of the STAGE study ( $P < 0.01$ ,  $P < 0.03$ ,  $P < 0.05$ , respectively) and with mouse plasma LDL in the HMDP<sup>8</sup> ( $P < 0.0007$ ). There was no significant enrichment with genes that have been associated with CAD or atherosclerosis in previous studies ( $P > 0.05$ ).<sup>7</sup>





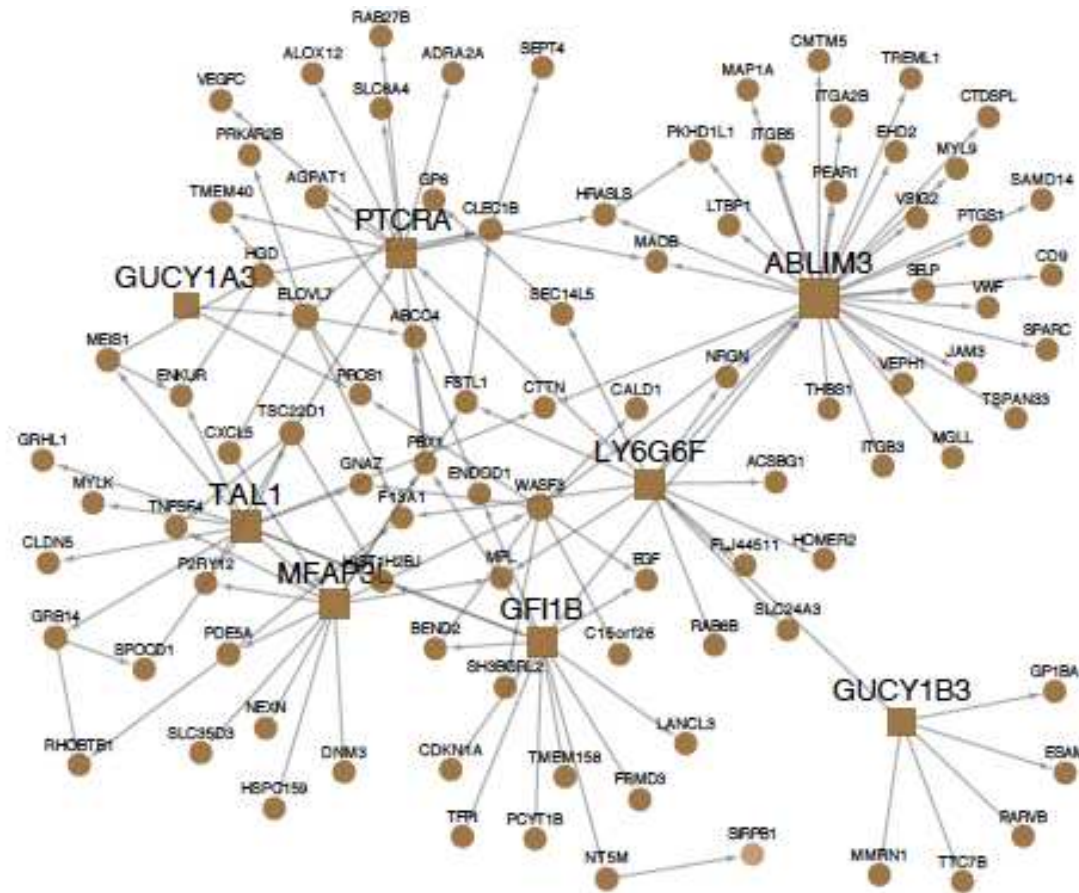

**I. Regulatory Gene Network, ID 47 (also in Figure 4B).** A whole blood network with 100 genes and 8 key disease drivers, that contributes to **0.41%** of CAD heritability (beyond that of genome-wide significant and FDR loci identified by previous CAD GWA studies). According to GO, this network is strongly enriched for genes involved in blood coagulation ( $P < 1.27e^{-19}$ ). The network genes are also associated with levels of total cholesterol in plasma of the CAD patients of the STAGE study ( $P < 0.02$ ) and in the HMDP with plasma levels of LDL ( $P < 0.03$ ) and insulin ( $P < 0.0001$ ). eSNPs in this network's genes are strongly enriched for associations with plasma levels of LDL, HbA1c, and insulin (2.35 fold,  $P < 2.31e^{-21}$ , 2.66 fold,  $P < 1.28e^{-30}$  and 1.54 fold,  $P < 7.10e^{-5}$ , respectively) according to corresponding GWA studies<sup>7</sup>. This network also contains the following GWA candidate genes; *GUCY1A3*, *GUCY1B3* (LDL) and *GRB14* (insulin) and *AIDR2A* (glucose). A total of 52 % of the genes in this network have in some fashion been associated with CAD or atherosclerosis in previous studies ( $P < 4.66e^{-8}$ ).<sup>7</sup>

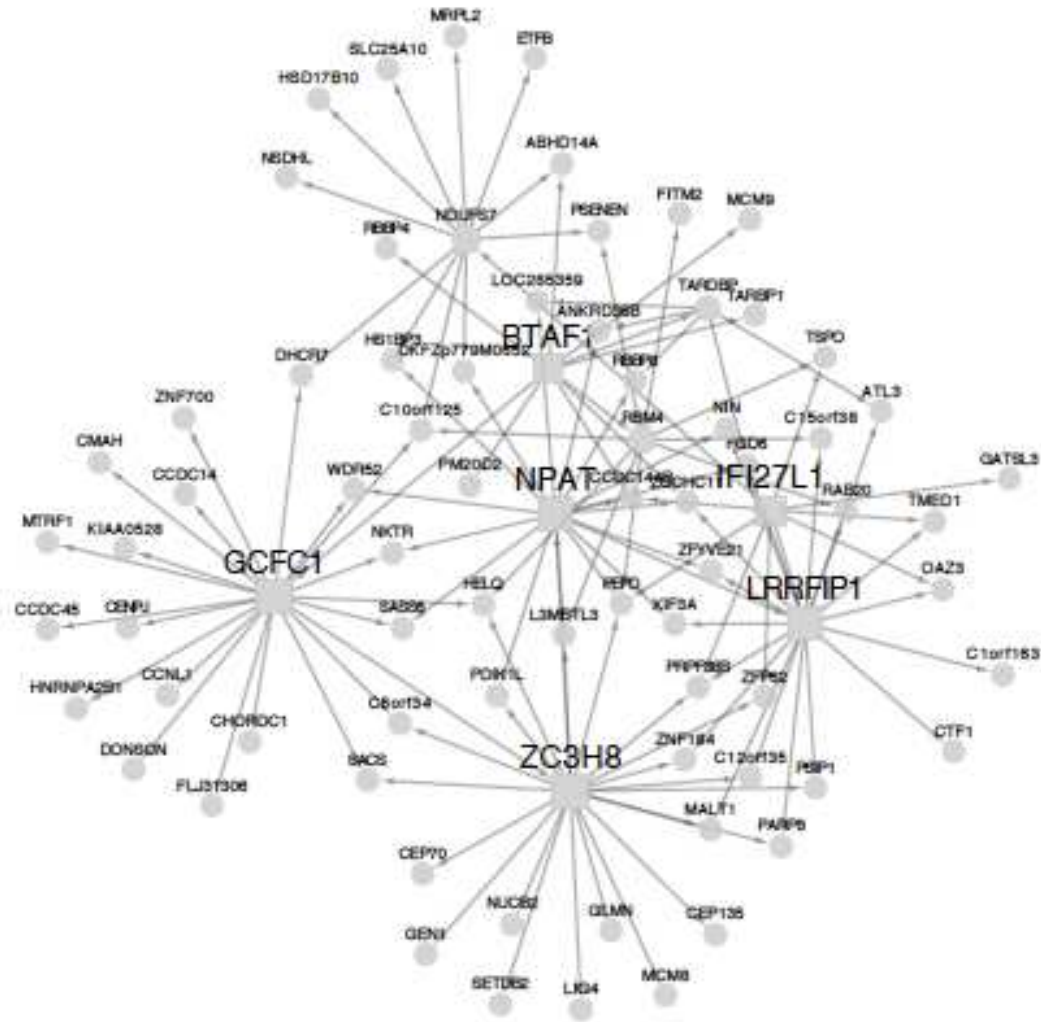

**J. Regulatory Gene Network, ID 63.** A visceral abdominal fat network with 79 genes and 6 key disease drivers, that contributes to **0.58%** of CAD heritability (beyond that of genome-wide significant and FDR loci identified by previous CAD GWA studies). According to GO, this network is weakly enriched for genes involved in cell cycle phase transition ( $P < 1.01 \times 10^{-3}$ ). The network genes are also associated with levels of CRP in the CAD patients of the STAGE study ( $P < 0.04$ ). There was no significant enrichment with genes that have been associated with CAD or atherosclerosis in previous studies ( $P > 0.05$ ).<sup>7</sup>

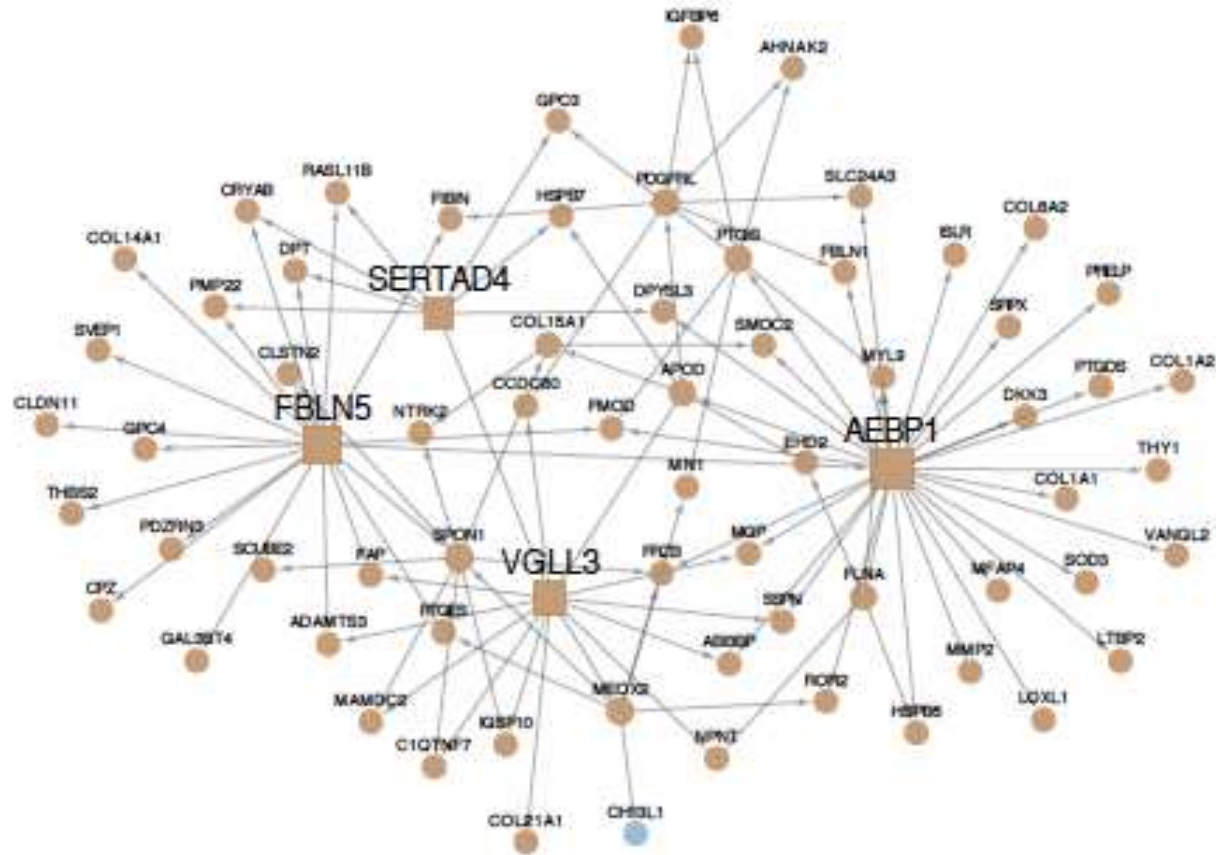

**K. Regulatory Gene Network, ID 73.** A liver network with 70 genes and 4 key disease drivers, that contributes to **0.22%** of CAD heritability (beyond that of genome-wide significant and FDR loci identified by previous CAD GWA studies). According to GO, this network is enriched for genes involved in cell adhesion ( $P < 7.09e^{-13}$ ). The network genes are also associated with levels of plasma cholesterol and HDL in the CAD patients of the STAGE study ( $P < 0.01$  and  $P < 0.05$ ) and in the HMDP with mouse plasma LDL levels ( $P > 0.0002$ ). eSNPs in this network's genes are enriched for associations with plasma levels of glucose and strongly for HbA1c (2.86 fold,  $P < 8.08e^{-6}$ , 10 fold,  $P < 1.49e^{-104}$ , respectively) according to corresponding GWA studies<sup>7</sup>. This network also contains one GWA candidate gene, *SVEP1*. A total of 61 % of the genes in this network have in some fashion been associated with CAD or atherosclerosis in previous studies ( $P < 1.21e^{-12}$ ).<sup>7</sup>

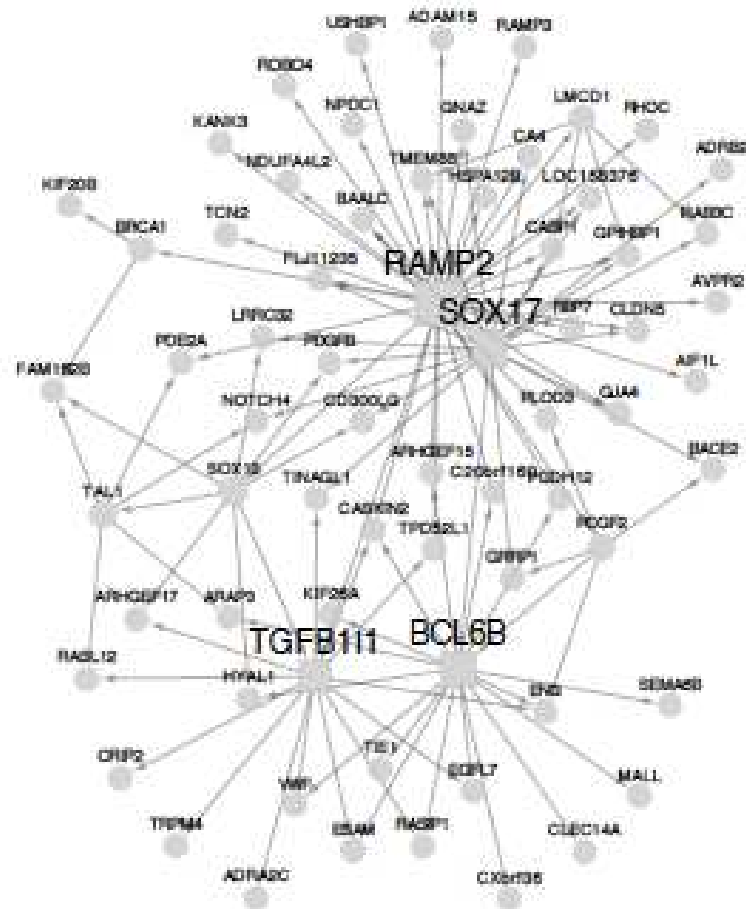

**L. Regulatory Gene Network, ID 76.** A visceral abdominal fat network with 68 genes and 4 key disease drivers, that contributes to **0.23%** of CAD heritability (beyond that of genome-wide significant and FDR loci identified by previous CAD GWA studies). According to GO, this network is enriched for genes involved in angiogenesis ( $P < 2.90e^{-5}$ ). The network genes are also associated with levels of LDL and degree of coronary atherosclerosis in the CAD patients of the STAGE study ( $P < 0.01$  and  $P < 0.0003$ ). eSNPs in this network's genes are enriched for associations with plasma levels of glucose (4.29 fold,  $P < 4.90e^{-23}$ ) according to corresponding GWA studies <sup>7</sup>. This network also contains one GWA candidate gene, *Sox17* (LDL and total cholesterol). A total of 38 % of the genes in this network have in some fashion been associated with CAD or atherosclerosis in previous studies ( $P < 0.02$ ).<sup>7</sup>

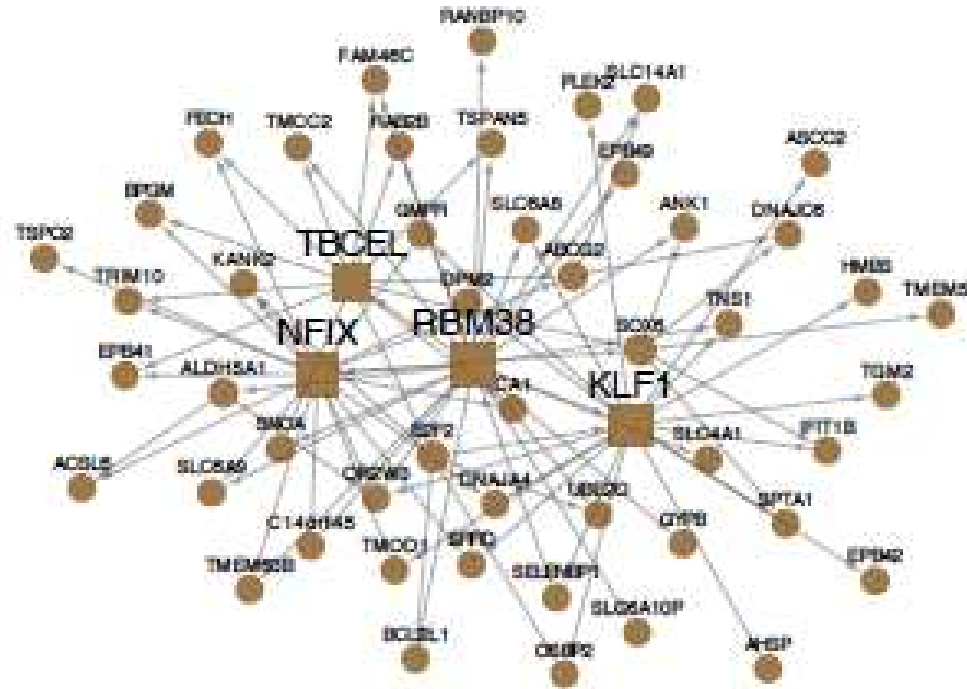

**M. Regulatory Gene Network, ID 94.** A whole blood network with 53 genes and 4 key disease drivers, that contributes to **0.25%** of CAD heritability (beyond that of genome-wide significant and FDR loci identified by previous CAD GWA studies). According to GO, this network is enriched for genes involved in erythrocyte homeostasis ( $P < 5.12e^{-8}$ ). The network genes are also associated with levels of CRP in the CAD patients of the STAGE study ( $P < 0.04$ ). This network also contains one GWA candidate gene, *KANK2* (HDL). A total of 38 % of the genes in this network have in some fashion been associated with CAD or atherosclerosis in previous studies ( $P < 0.05$ ).<sup>7</sup>





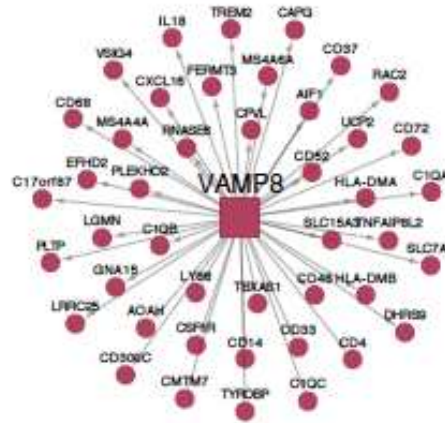

**O. Regulatory Gene Network, ID 103 (also in Figure 4B).** An atherosclerotic aortic wall network with 45 genes and 1 key disease driver, that contributes to **0.33%** of CAD heritability (beyond that of genome-wide significant and FDR loci identified by previous CAD GWA studies). According to GO, this network is weakly enriched for genes involved in defense response ( $P < 3.50e^{-9}$ ). The network genes are also associated with levels of HDL and pro-insulin in the CAD patients of the STAGE study ( $P < 0.03$  and  $P < 0.01$ , respectively) and in the HMDP with mouse plasma LDL levels ( $P < 0.001$ ). This network also contains two GWA candidate genes, *PLTP* (HDL) and *VAMP8* (CAD). There was no significant enrichment with genes that have been associated with CAD or atherosclerosis in previous studies ( $P > 0.05$ ).<sup>7</sup>

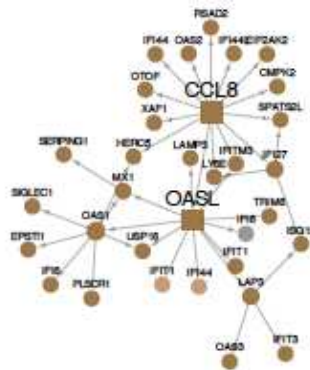

**P. Regulatory Gene Network, ID 128.** A liver network with 33 genes and 2 key disease drivers, that contributes to **0.26 %** of CAD heritability (beyond that of genome-wide significant and FDR loci identified by previous CAD GWA studies). According to GO, this network is strongly enriched for genes involved in type-1 interferon signaling pathway ( $P < 6.49e^{-22}$ ). eSNPs of this network's genes are weakly enriched for associations with plasma levels of HbA1c and pro-insulin (1.37 fold,  $P < 2.38e^{-2}$  and 1.44 fold,  $P < 7.68e^{-3}$ , respectively) according to corresponding GWA studies<sup>7</sup>. This network also contains the

following GWA candidate gene; *OAS3* (unknown). There was no significant enrichment with genes that have been associated with CAD or atherosclerosis in previous studies ( $P>0.05$ ).<sup>7</sup>

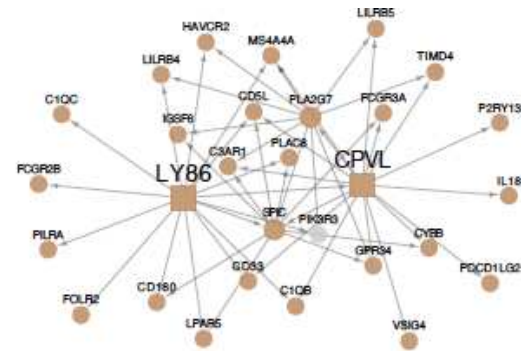

**Q. Regulatory Gene Network, ID 144.** A liver network with 29 genes and 2 key disease drivers, that contributes to **0.25%** of CAD heritability (beyond that of genome-wide significant and FDR loci identified by previous CAD GWA studies). According to GO, this network is enriched for genes involved in immune response ( $P<7.96e^{-5}$ ). The network genes are also associated with levels of total cholesterol and strongly with CRP in the CAD patients of the STAGE study ( $P<0.02$  and  $P<0.00005$ , respectively). This network also contains one GWA candidate gene, *TIMD4* (total cholesterol and triglycerides). There was no significant enrichment with genes that have been associated with CAD or atherosclerosis in previous studies ( $P>0.05$ ).<sup>7</sup>



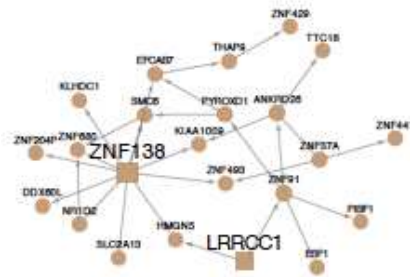

**R. Regulatory Gene Network, ID 157.** A liver network with 23 genes and 2 key disease drivers, that contributes to **0.32%** of CAD heritability (beyond that of genome-wide significant and FDR loci identified by previous CAD GWA studies). According to GO, this network is weakly enriched for genes involved in DNA binding ( $P < 1.90e^{-3}$ ). eSNPs in this network's genes are enriched for associations with plasma levels of LDL, total cholesterol and triglycerides and HbA1c (3.30 fold,  $P < 8.97e^{-34}$ , 2.45 fold,  $P < 9.54e^{-14}$ , 2.89 fold,  $P < 1.30e^{-23}$  and 2.27 fold,  $P < 4.61e^{-10}$ , respectively) according to corresponding GWA studies<sup>7</sup>. There was no significant enrichment with genes that have been associated with CAD or atherosclerosis in previous studies ( $P > 0.05$ ).<sup>7</sup>

**Online Figure 5.** Shown are 11 cross-tissue (<95 % of nodes from one tissue) regulatory gene networks (**A-J**) with key disease drivers that were originally identified in the STAGE study<sup>7</sup> and replicated in the STARNET study<sup>1</sup> with contributions to CAD heritability >0.2% per network.

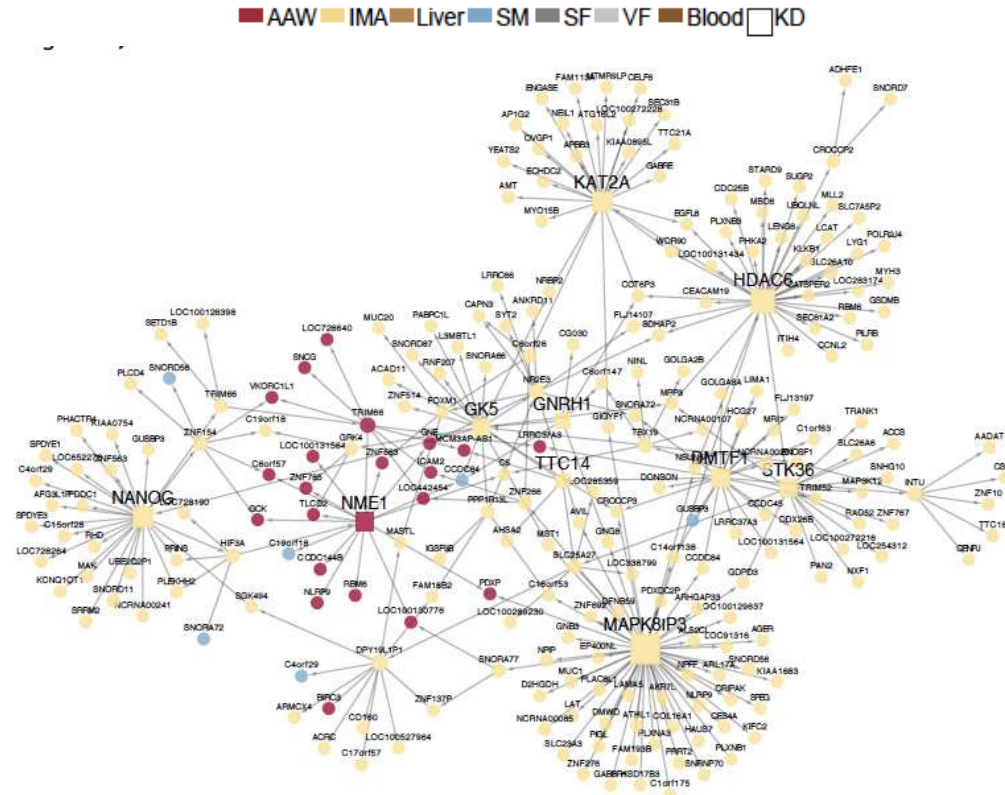

**A. Regulatory Gene Network, ID 12.** An arterial wall network (including nodes/genes from both none/early (internal mammary artery, yellow) and late advanced (aortic wall, red) atherosclerosis with 246 genes and 10 key disease drivers contributing to **1.15%** of CAD heritability (beyond that of genome-wide significant and FDR loci identified by previous CAD GWA studies). This network was not enriched for genes in any known functional category according to gene ontology (GO) but associated with degree of coronary atherosclerosis in CAD patients of the STAGE study ( $P < 0.03$ ). eSNPs of this network genes are enriched for association with plasma levels of total cholesterol, LDL and triglycerides (2.26 fold,  $P < 2.19e^{-16}$ , 2.20 fold,  $P < 5.70e^{-16}$  and 1.69 fold,  $P < 1.13e^{-6}$ , respectively) according to corresponding GWA studies<sup>7</sup>. This network also contains the following GWA candidate genes; *ACAD11* (for plasma levels of LDL and HDL), *LACT1* (HDL), *GCK* (fasting glucose) and *C6orf57* (unknown). There was no significant enrichment with genes that have been associated with CAD or atherosclerosis in previous studies ( $P > 0.05$ ).<sup>7</sup>

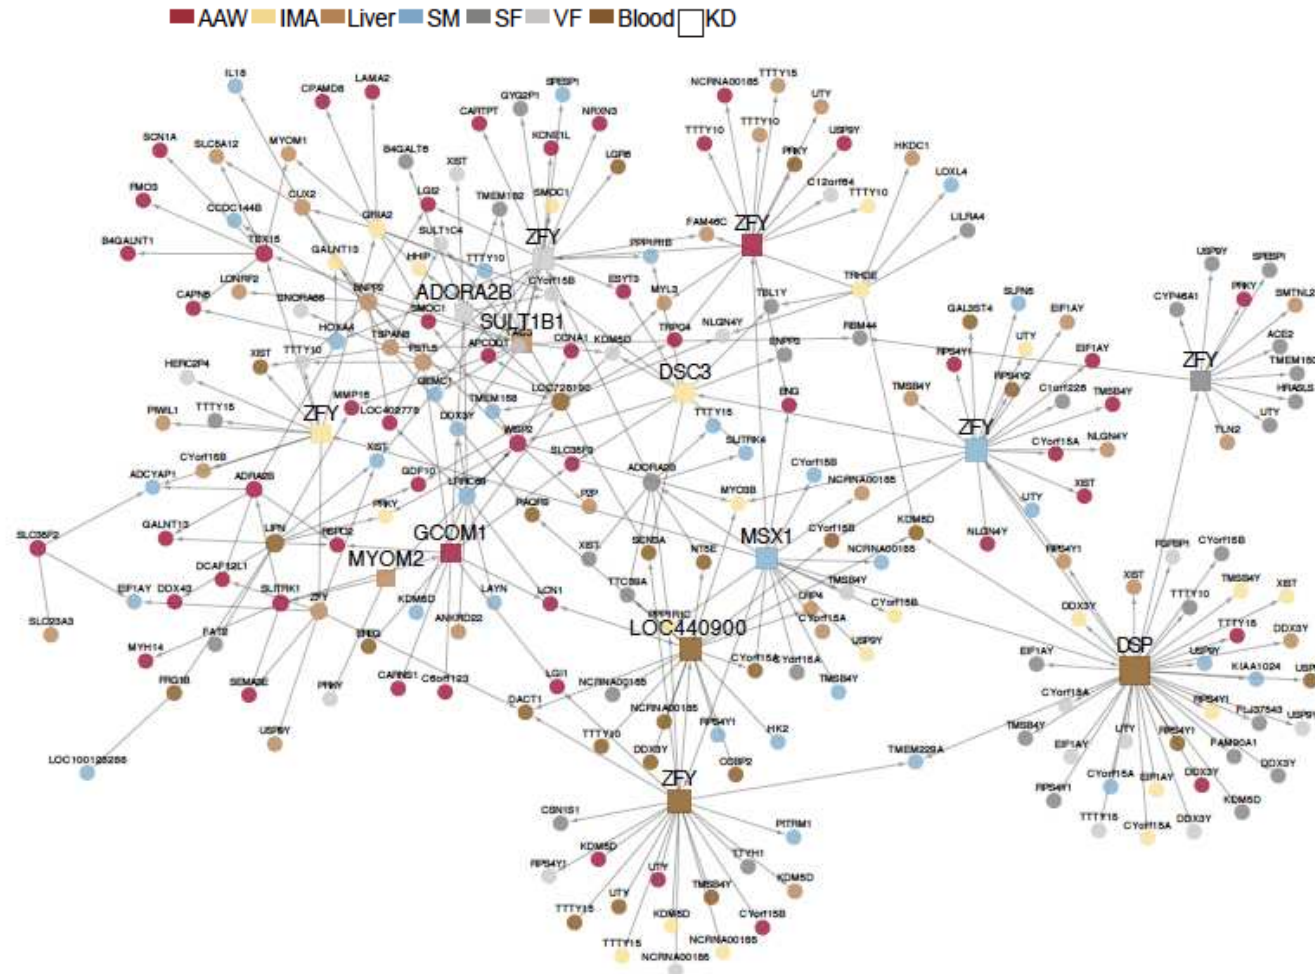

**B. Regulatory Gene Network, ID 13.** A cross-tissue (i.e., arterial wall, liver skeletal muscle and fat) network with 227 genes and 14 key disease drivers, that contributes to **0.77 %** of CAD heritability (beyond that of genome-wide significant and FDR loci identified by previous CAD GWA studies). According to GO, this network is slightly enriched for genes involved in scavenger receptor activity ( $P < 3.76e^{-4}$ ). eSNPs of this network genes are enriched for association with plasma levels of total triglycerides, fasting glucose and HbA1c (1.41 fold,  $P < 2.83e^{-5}$ , 1.81 fold,  $P < 6.35e^{-16}$  and 1.71 fold,  $P < 1.46e^{-14}$ , respectively) according to corresponding GWA studies<sup>7</sup>. This network also contains the following GWA candidate genes; *LRP14* (HDL) and *MMP16*, *TSPAN8* (unknown). There was no significant enrichment with genes that have been associated with CAD or atherosclerosis in previous studies ( $P > 0.05$ )<sup>7</sup>.





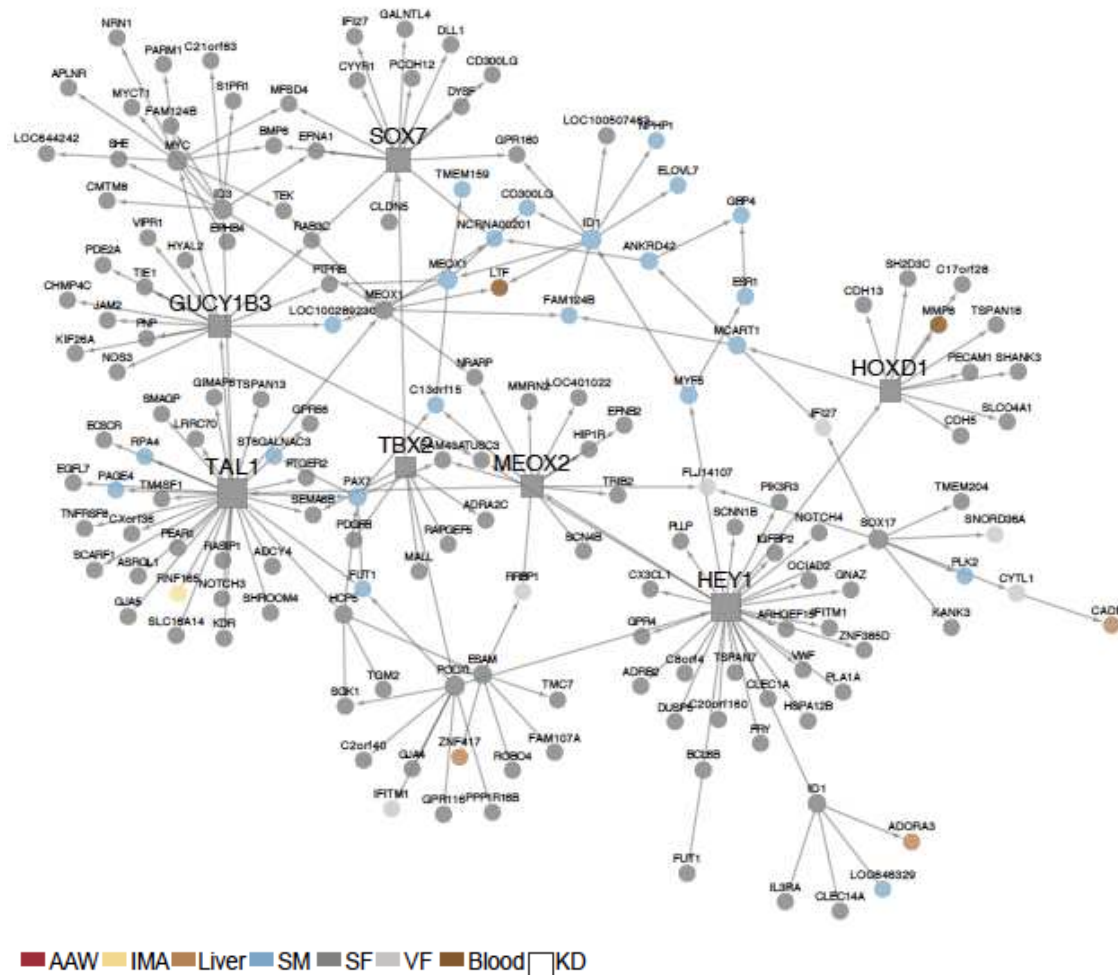

**D. Regulatory Gene Network, ID 27.** A cross-tissue (mostly subcutaneous fat and skeletal muscle nodes/genes) network with 165 genes and 7 key disease drivers, that contributes to **0.45 %** of CAD heritability (beyond that of genome-wide significant and FDR loci identified by previous CAD GWA studies). According to GO, this network is enriched for genes involved in blood vessel development ( $P < 8.76e^{-18}$ ). The network genes were also associated with plasma levels of blood insulin and LDL in the CAD patients ( $P < 0.02$  and  $P < 0.03$ ) of the STAGE study<sup>7</sup> and with mouse plasma LDL in the HMDP<sup>8</sup> ( $P < 0.00004$ ). This network also contains the following GWA candidate genes; *GUCY1B3* (CAD), *SOX17* (LDL) and *GALNTL4* (unknown). A total of 37 % of the genes in this network have in some fashion been associated with CAD or atherosclerosis in previous studies ( $P < 0.002$ ).<sup>7</sup>

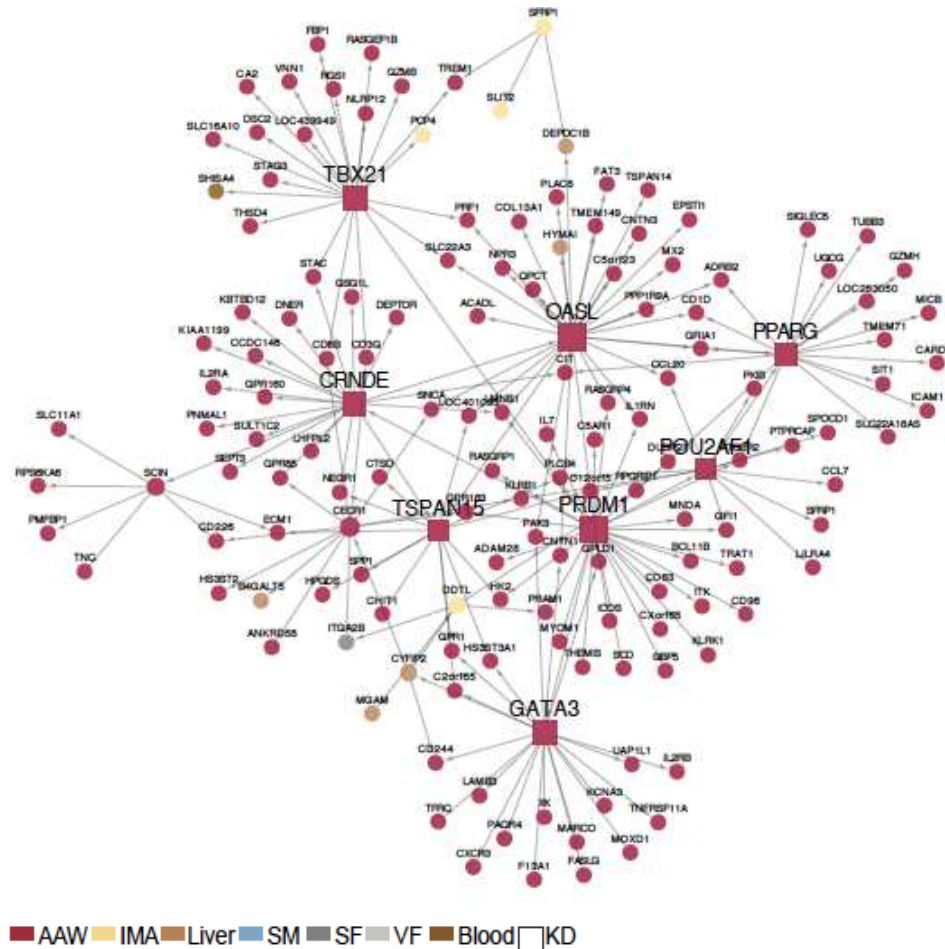

**E. Regulatory Gene Network, ID 29.** A cross-tissue (mainly early/no and advanced atherosclerosis arterial wall nodes/genes) network with 152 genes and 8 key disease drivers, that contributes to **0.28 %** of CAD heritability (beyond that of genome-wide significant and FDR loci identified by previous CAD GWA studies). According to GO, this network is enriched for genes involved in regulation of immune system processes ( $P < 3.06 \times 10^{-13}$ ). The network genes were also associated with plasma levels of HbA1c in the CAD patients ( $P < 0.05$ ) of the STAGE study<sup>7</sup> and eSNPs of this network genes are enriched for association with plasma levels of total triglycerides, HDL and fasting glucose (2.31 fold,  $P < 4.05 \times 10^{-9}$ , 1.95 fold,  $P < 2.80 \times 10^{-5}$  and 3.49 fold,  $P < 3.03 \times 10^{-30}$ , respectively) according to corresponding GWA studies. This network also contains the following GWA candidate genes; *RASGRP1*, *PPARG* and *DNER* (unknown). A total of 45 % of the genes in this network have in some fashion been associated with CAD or atherosclerosis in previous studies ( $P < 2.95 \times 10^{-7}$ ).<sup>7</sup>

■ AAW ■ IMA ■ Liver ■ SM ■ SF ■ VF ■ Blood □ KD

All\_modules

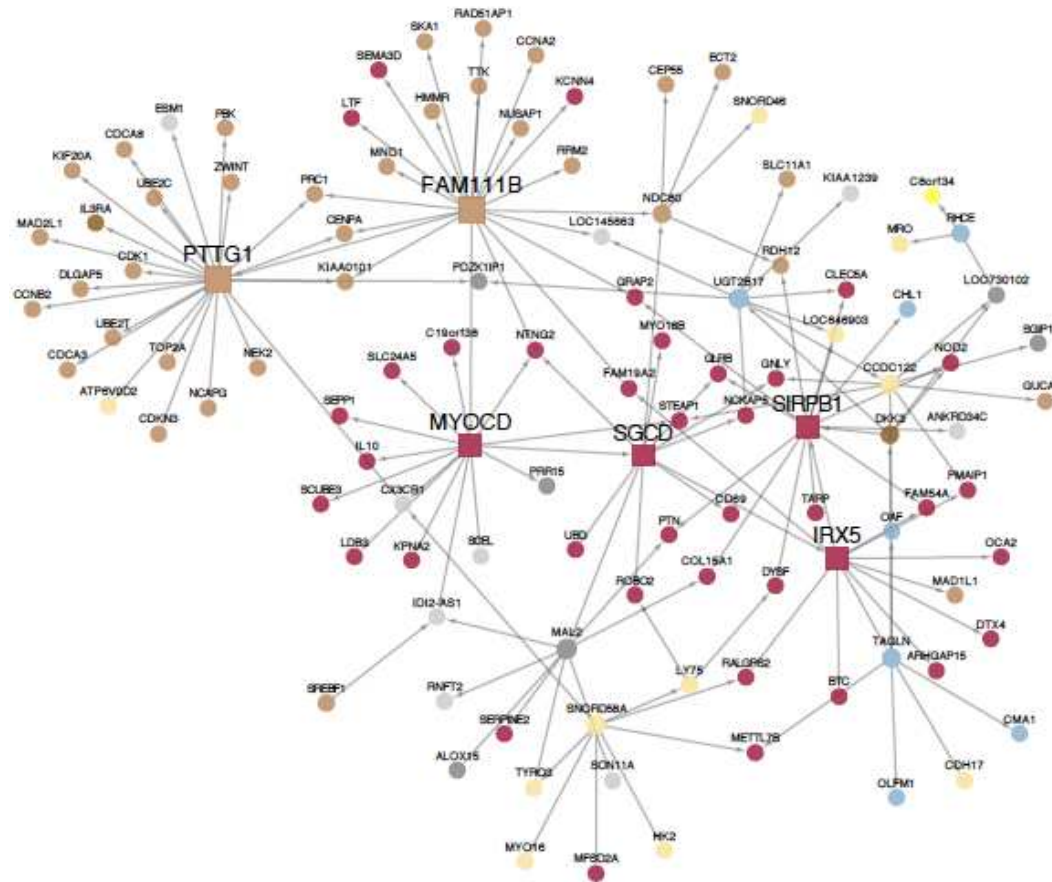

**F. Regulatory Gene Network, ID 38.** A cross-tissue (mainly early/no and advanced atherosclerosis arterial wall, liver and skeletal muscle nodes/genes) network with 113 genes and 6 key disease drivers, that contributes to **0.24 %** of CAD heritability (beyond that of genome-wide significant and FDR loci identified by previous CAD GWA studies). According to GO, this network is enriched for genes involved in cell division ( $P < 6.14e^{-12}$ ). eSNPs of this network genes are strongly enriched for associations with plasma levels of total triglycerides, total cholesterol and LDL, and weakly associated with plasma levels of pro-insulin and fasting insulin (4.19 fold,  $P < 1.23e^{-157}$ , 2.42 fold,  $P < 8.83e^{-32}$ , 1.91 fold,  $P < 2.73e^{-14}$ , 1.73 fold,  $P < 1.701e^{-8}$  and 1.37 fold,  $P < 7.718e^{-4}$ , respectively) according to corresponding GWA studies.<sup>7</sup> This network also contains the following GWA candidate genes; *CHC1* (insulin) and *PRC1* (unknown). A total of 36 % of the genes in this network have in some fashion been associated with CAD or atherosclerosis in previous studies ( $P < 0.02$ ).<sup>7</sup>

■ AAW ■ IMA ■ Liver ■ SM ■ SF ■ VF ■ Blood □ KD

All\_modules

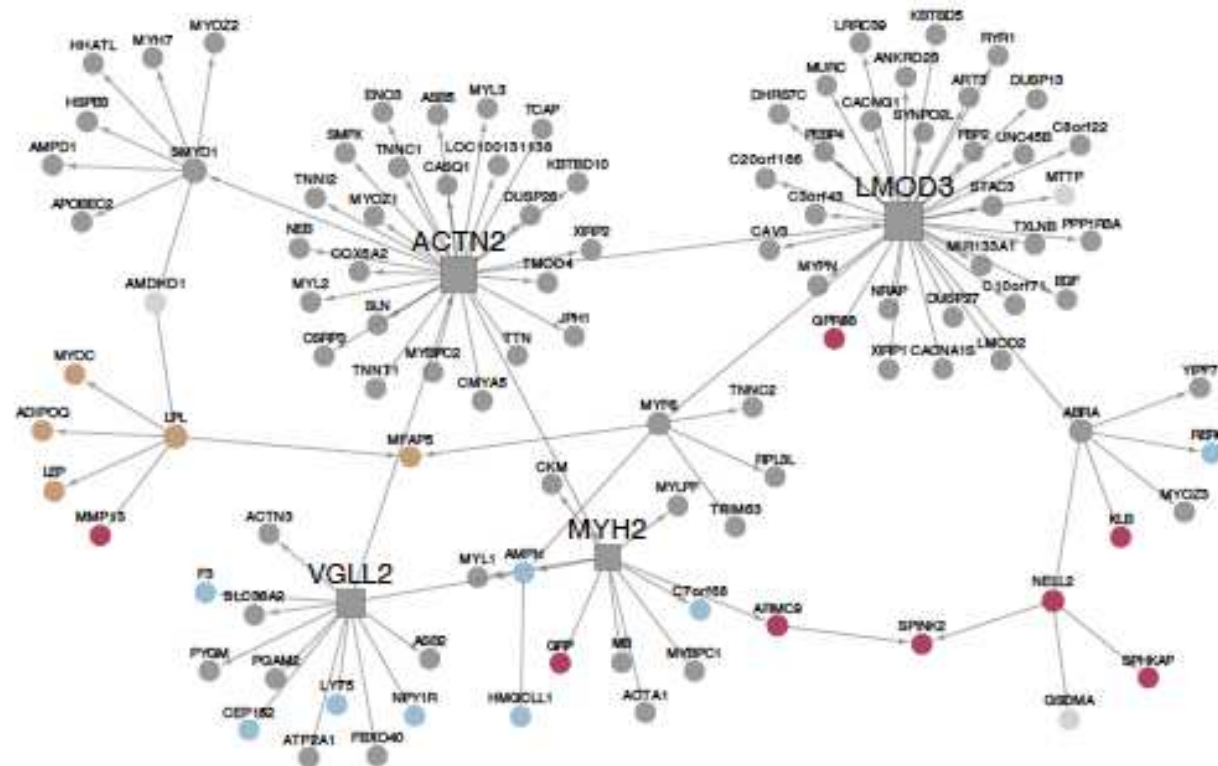

**G. Regulatory Gene Network, ID 43.** A cross-tissue (mainly subcutaneous fat nodes/genes) network with 108 genes and 4 key disease drivers, that contributes to **0.36 %** of CAD heritability (beyond that of genome-wide significant and FDR loci identified by previous CAD GWA studies). According to GO, this network is strongly enriched for genes involved in actin-myosin filament sliding ( $P < 8.25e^{-26}$ ). eSNPs of this network genes are strongly enriched for associations with plasma levels of total cholesterol, LDL and HDL (5.94 fold,  $P < 7.31e^{-138}$ , 3.28 fold,  $P < 7.16e^{-27}$  and 4.28 fold,  $P < 6.35e^{-277}$ , respectively) according to corresponding GWA studies.<sup>7</sup> This network also contains the following GWA candidate genes; *LPL* (HDL and triglycerides) and *MYL2* (HDL). A total of 55 % of the genes in this network have in some fashion been associated with CAD or atherosclerosis in previous studies ( $P < 4.84e^{-10}$ ).<sup>7</sup>

■ AAW ■ IMA ■ Liver ■ SM ■ SF ■ VF ■ Blood □ KD



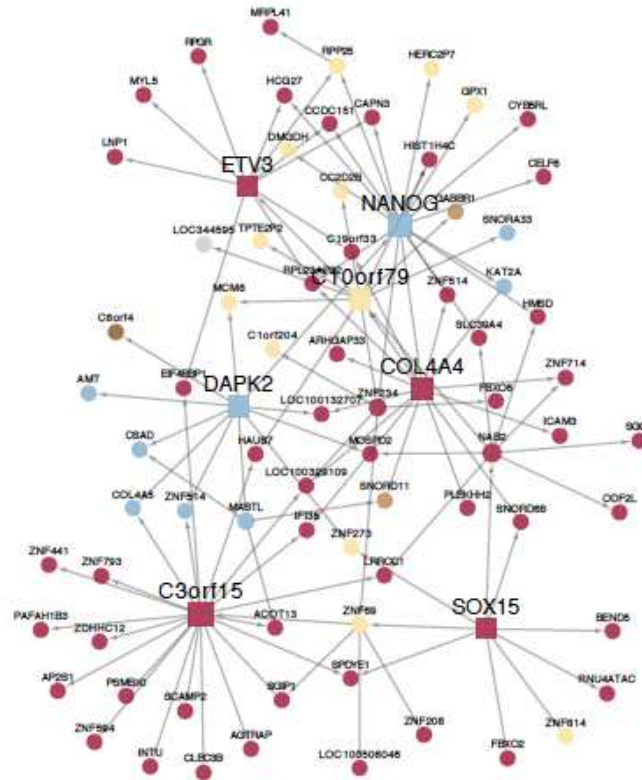

**H. Regulatory Gene Network, ID 62.** A cross-tissue (mainly early/no and advanced atherosclerosis arterial wall and skeletal muscle nodes/genes) network with 80 genes and 7 key disease drivers, that contributes to **0.41 %** of CAD heritability (beyond that of genome-wide significant and FDR loci identified by previous CAD GWA studies). According to GO, this network is weakly enriched for genes involved in regulation of satellite cell activation involved in muscle regeneration ( $P < 8.08e^{-3}$ ). The network genes were also associated with degree of coronary atherosclerosis in CAD patients of the STAGE study ( $P < 0.04$ ).<sup>7</sup> eSNPs of this network genes are remarkably enriched for associations with plasma levels of triglycerides, total cholesterol and LDL (8.12 fold,  $P < 7.31e^{-208}$ , 6.93 fold,  $P < 3.42e^{-208}$  and 5.69 fold,  $P < 3.73e^{-119}$ , respectively) according to corresponding GWA studies.<sup>7</sup> This network also contains the following GWA candidate gene; *HIST1H4C* (LDL). There was no significant enrichment with genes that have been associated with CAD or atherosclerosis in previous studies ( $P > 0.05$ ).<sup>7</sup>

■ AAW ■ IMA ■ Liver ■ SM ■ SF ■ VF ■ Blood □ KD



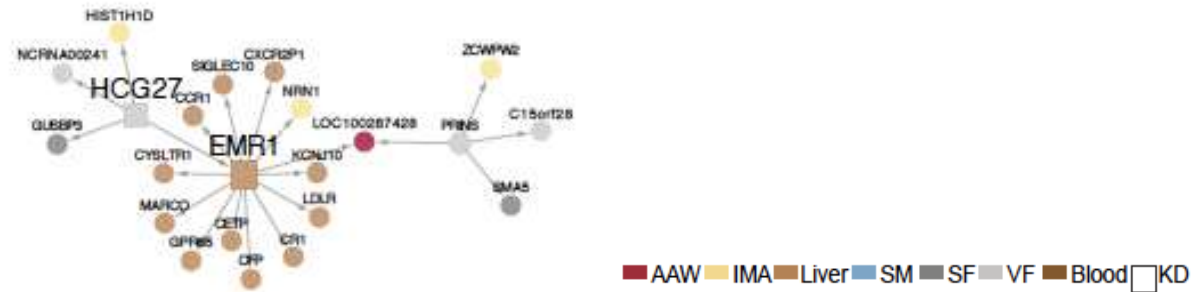

- J. Regulatory Gene Network, ID 112.** A cross-tissue (mainly liver and fat nodes/genes) network with 40 genes and 2 key disease drivers, that contributes to **0.38 %** of CAD heritability (beyond that of genome-wide significant and FDR loci identified by previous CAD GWA studies). According to GO, this network is enriched for genes acting as intrinsic components of the plasma membrane ( $P < 2.30e^{-6}$ ). The network genes were also associated with plasma levels of pro-insulin in CAD patients of the STAGE study ( $P < 0.01$ )<sup>7</sup> and with mouse plasma insulin and glucose in the HMDP<sup>8</sup> ( $P < 0.003$  and  $P < 0.005$ ). eSNPs of this network's genes are enriched for associations with plasma levels of triglycerides, total cholesterol and HDL (3.32 fold,  $P < 7.20e^{-31}$ , 1.84 fold,  $P < 2.84e^{-5}$  and 2.49 fold,  $P < 6.39e^{-14}$ , respectively) according to corresponding GWA studies.<sup>7</sup> This network also contains the following GWA candidate genes; *LDLR* (CAD, total cholesterol, LDL and HDL) and *CETP* (unknown). There was no significant enrichment with genes that have been associated with CAD or atherosclerosis in previous studies ( $P > 0.05$ ).<sup>7</sup>

**Online Table 1. Genotype Platforms of the Studies**

| Study        | Platform                                                                               |
|--------------|----------------------------------------------------------------------------------------|
| GerMIFSI     | Affymetrix Mapping 500K Array Set                                                      |
| GerMIFSI     | Affymetrix Genome-Wide Human SNP Array 6.0                                             |
| GerMIFSI     | Affymetrix Genome-Wide Human SNP Array 5.0/ Affymetrix Genome-Wide Human SNP Array 6.0 |
| GerMIFSI     | Affymetrix Genome-Wide Human SNP Array 6.0                                             |
| GerMIFSV     | Illumina HumanOmniExpress/Omniuni_2.5/Omni_Express                                     |
| LURIC        | Affymetrix Genome-Wide Human SNP Array 6.0                                             |
| MIGEN        | Affymetrix Mapping 500K Array Set                                                      |
| WTCCC        | Affymetrix Genome-Wide Human SNP Array 6.0                                             |
| Cardiogenics | Illumina Human660W-Quad                                                                |
| STAGE        | Affymetrix Genome-Wide Human SNP Array 6.0                                             |
| STARNET      | Illumina HumanOmniExpress/Omniuni_2.5/Omni_Express                                     |

**Online Table 2. GWAS lead SNP and STAGE/STARNET network and eSNP CAD heritability contributions**

| Source                        | SNP/network list                             | # lead SNPs/<br>CAD networks | CAD<br>Variance | standard<br>error | P-value  | % of total CAD heritability (h <sup>2</sup> ): |               |                                   |                         |                                  |
|-------------------------------|----------------------------------------------|------------------------------|-----------------|-------------------|----------|------------------------------------------------|---------------|-----------------------------------|-------------------------|----------------------------------|
|                               |                                              |                              |                 |                   |          | total                                          | per network** | per GWAS<br>SNP/network<br>eSNP** | per bkgr GTE<br>eSNP*** | Fold vs.bkgr<br>GTE<br>eSNPs**** |
| GWAS                          | imputed SNPs from GWAS                       | 4 065 644                    | 0.312215        | 0.011894          | 0        | 78.05                                          | N/A           | 0.00028                           | N/A                     | N/A                              |
|                               | lead SNPs of genome-wide<br>significant loci | 42 (59)*                     | 0.0218          | 0.0049            | 0        | 5.46                                           | N/A           | 0.130                             | N/A                     | N/A                              |
|                               | extended FDR<5% SNPs                         | 99 (202)*                    | 0.0309          | 0.0046            | 0        | 7.73                                           | N/A           | 0.078                             | N/A                     | N/A                              |
|                               | Lead and FDR<5% SNPs                         | 119 (250)*                   | 0.0348          | 0.0048            | 0        | 8.71                                           | N/A           | 0.073                             | N/A                     | N/A                              |
| STAGE/<br>STARNET<br>Networks | All networks                                 | 98                           | 0.0475          | 0.0041            | 0        | 11.87                                          | 0.12          | 0.0055                            | 0.0022                  | 2.49                             |
|                               | top-networks (>0.2% h <sup>2</sup> )         | 28(98)                       | 0.0399          | 0.0037            | 0        | 9.98                                           | 0.36          | 0.0072                            | 0.0023                  | 3.12                             |
|                               | fat networks                                 | 9(28)                        | 0.0201          | 0.0027            | 0        | 5.03                                           | 0.56          | 0.0073                            | 0.0027                  | 2.67                             |
|                               | non-fat networks                             | 19(28)                       | 0.0267          | 0.0031            | 0        | 6.67                                           | 0.35          | 0.0077                            | 0.0021                  | 3.62                             |
|                               | arterial wall networks                       | 7(28)                        | 0.0126          | 0.0021            | 9.05E-15 | 3.14                                           | 0.45          | 0.0086                            | 0.0029                  | 2.96                             |
|                               | liver networks                               | 3(28)                        | 0.0031          | 0.0010            | 2.91E-06 | 0.78                                           | 0.26          | 0.0144                            | 0.0034                  | 4.28                             |
|                               | cross-tissue networks                        | 5(28)                        | 0.0099          | 0.0020            | 2.60E-09 | 2.47                                           | 0.49          | 0.0115                            | 0.0024                  | 4.89                             |
|                               | skeletal muscle network                      | 1(28)                        | 0.0010          | 0.0006            | 0.01604  | 0.26                                           | 0.26          | 0.0056                            | 0.0026                  | 2.18                             |
| whole blood networks          | 3(28)                                        | 0.0037                       | 0.0011          | 2.63E-06          | 0.93     | 0.31                                           | 0.0050        | 0.0025                            | 2.01                    |                                  |

H<sup>2</sup>, % CAD heritability contributions. For all the network-derived H<sup>2</sup> estimates, the CAD GWAS lead SNPs including SNPs with r<sup>2</sup>>0.2 in the flanking ±500kb regions, were excluded prior to calculation.

\*Number of lead SNPs present in the GWA data of this study related to actual number found in the original GWA study (in paranthesis). \*\*shows average CAD H<sup>2</sup> contributions per GWAS SNP and network eSNP

\*\*\*shows average CAD H<sup>2</sup> contributions from equally sized groups of random background eSNP matched by tissue (n>100) obtained from GTE. \*\*\*\*P<0.001









**Online Table 6. Top-28 module gene IDs and their characteristics**  
 (See separate PDF file)

**Supplementary Table 6. Module gene IDs and characteristics**

| Module ID | Gene Symbol | Tissue | eQTL | TF | Key Driver | Candidate gene in GWAS for: |                           |                               |      |
|-----------|-------------|--------|------|----|------------|-----------------------------|---------------------------|-------------------------------|------|
|           |             |        |      |    |            | CAD                         | Plasma glucose metabolism | Plasma cholesterol metabolism | T2DM |
| 2         | ADA         | VF     |      |    |            |                             |                           |                               |      |
| 2         | BLM         | VF     |      |    |            |                             |                           |                               |      |
| 2         | CD3G        | VF     |      |    |            |                             |                           |                               |      |
| 2         | CDK4LG      | VF     |      |    |            |                             |                           |                               |      |
| 2         | CHRNA1      | VF     |      |    |            |                             |                           |                               |      |
| 2         | F8          | VF     |      |    |            |                             |                           |                               |      |
| 2         | GBE1        | VF     |      |    |            |                             |                           |                               |      |
| 2         | IL2RG       | VF     |      |    |            |                             |                           |                               |      |
| 2         | JAK3        | VF     |      |    |            |                             |                           |                               |      |
| 2         | KCNA1       | VF     |      |    |            |                             |                           |                               |      |
| 2         | KRT19       | VF     |      |    |            |                             |                           |                               |      |
| 2         | SCCB        | VF     |      |    |            |                             |                           |                               |      |
| 2         | LIG1        | VF     | X    |    | X          |                             |                           |                               |      |
| 2         | GPR143      | VF     |      |    |            |                             |                           |                               |      |
| 2         | PDE6B       | VF     |      |    |            |                             |                           |                               |      |
| 2         | TSHR        | VF     |      |    |            |                             |                           |                               |      |
| 2         | WAS         | VF     |      |    |            |                             |                           |                               |      |
| 2         | KRT2        | VF     | X    |    | X          |                             |                           |                               |      |
| 2         | PAFAH2      | VF     |      |    |            |                             |                           |                               |      |
| 2         | PON1        | VF     |      |    |            |                             |                           |                               |      |
| 2         | RAG1        | VF     | X    | X  |            |                             |                           |                               |      |
| 2         | TWIST1      | VF     |      |    |            |                             |                           |                               |      |
| 2         | AMPD3       | VF     |      |    |            |                             |                           |                               |      |
| 2         | RAG2        | VF     |      |    |            |                             |                           |                               |      |
| 2         | LTA         | VF     |      |    |            |                             |                           |                               |      |
| 2         | ADORA2A     | VF     |      |    |            |                             |                           |                               |      |
| 2         | CD3D        | VF     |      |    |            |                             |                           |                               |      |
| 2         | CD3E        | VF     |      |    |            |                             |                           |                               |      |
| 2         | CD247       | VF     |      |    |            |                             |                           |                               |      |
| 2         | CHRNA3      | VF     |      |    |            |                             |                           |                               |      |
| 2         | CHRNA5      | VF     | X    |    |            |                             |                           |                               |      |
| 2         | DCK         | VF     |      |    |            |                             |                           |                               |      |
| 2         | GABRA5      | VF     |      |    |            |                             |                           |                               |      |
| 2         | GLRB        | VF     |      |    |            |                             |                           |                               |      |
| 2         | IL2RB       | VF     |      |    |            |                             |                           |                               |      |
| 2         | PAM         | VF     |      |    |            |                             |                           |                               |      |
| 2         | PRIM1       | VF     |      |    |            |                             |                           |                               |      |
| 2         | PRL         | VF     |      |    |            |                             |                           |                               |      |
| 2         | NCERP1      | VF     |      |    |            |                             |                           |                               |      |
| 2         | RORC        | VF     |      | X  |            |                             |                           |                               |      |
| 2         | C9orf103    | VF     |      |    |            |                             |                           |                               |      |
| 2         | RUNX1       | VF     |      | X  |            |                             |                           |                               |      |
| 2         | UBASH3A     | VF     |      |    |            |                             |                           |                               |      |
| 2         | GATA3       | VF     |      | X  |            |                             |                           |                               |      |
| 2         | CENPM       | VF     |      |    |            |                             |                           |                               |      |
| 2         | C1orf173    | VF     |      |    |            |                             |                           |                               |      |
| 2         | C18orf1     | VF     |      |    |            |                             |                           |                               |      |
| 2         | TARP        | VF     |      |    |            |                             |                           |                               |      |
| 2         | BMF         | VF     |      |    |            |                             |                           |                               |      |
| 2         | OR13A1      | VF     |      |    |            |                             |                           |                               |      |
| 2         | UMODL1      | VF     |      |    |            |                             |                           |                               |      |
| 2         | OR10R2      | VF     |      |    |            |                             |                           |                               |      |
| 2         | OR10K1      | VF     |      |    |            |                             |                           |                               |      |
| 2         | SP140       | VF     |      | X  | X          |                             |                           |                               |      |
| 2         | RGS10       | VF     |      |    |            |                             |                           |                               |      |
| 2         | AK4         | VF     |      |    |            |                             |                           |                               |      |
| 2         | ZWINT       | VF     |      |    |            |                             |                           |                               |      |
| 2         | CPM         | VF     |      |    |            |                             |                           |                               |      |
| 2         | HAO2        | VF     |      |    |            |                             |                           |                               |      |
| 2         | RAB37       | VF     |      |    |            |                             |                           |                               |      |
| 2         | CR2         | VF     |      |    |            |                             |                           |                               |      |
| 2         | APOBEC3F    | VF     |      |    |            |                             |                           |                               |      |
| 2         | SF11        | VF     |      |    |            |                             |                           |                               |      |
| 2         | CKCR4       | VF     |      |    |            |                             |                           |                               |      |
| 2         | EML1        | VF     |      |    |            |                             |                           |                               |      |
| 2         | TDP1        | VF     |      |    |            |                             |                           |                               |      |
| 2         | STATH       | VF     |      |    |            |                             |                           |                               |      |
| 2         | LRRC38      | VF     |      |    |            |                             |                           |                               |      |
| 2         | TTC7B       | VF     |      |    |            |                             |                           |                               |      |
| 2         | THEMIS      | VF     |      |    |            |                             |                           |                               |      |
| 2         | BCAS4       | VF     |      |    |            |                             |                           |                               |      |
| 2         | BIRC5       | VF     |      |    |            |                             |                           |                               |      |
| 2         | ANOS        | VF     |      |    |            |                             |                           |                               |      |
| 2         | SGOL1       | VF     |      |    |            |                             |                           |                               |      |
| 2         | C18orf56    | VF     |      |    |            |                             |                           |                               |      |
| 2         | LAT         | VF     |      |    |            |                             |                           |                               |      |
| 2         | TLR10       | VF     |      |    |            |                             |                           |                               |      |
| 2         | ESCO2       | VF     |      |    |            |                             |                           |                               |      |
| 2         | CALN1       | VF     |      |    |            |                             |                           |                               |      |



| 2         | DNTT        | VF     |      |    |            |                             |                           |                               |      |
|-----------|-------------|--------|------|----|------------|-----------------------------|---------------------------|-------------------------------|------|
| 2         | BTBD11      | VF     |      |    |            |                             |                           |                               |      |
| 2         | DAP1        | VF     |      |    |            |                             |                           |                               |      |
| 2         | LRP8        | VF     |      |    |            |                             |                           |                               |      |
| 2         | GCOM1       | VF     |      |    |            |                             |                           |                               |      |
| 2         | FANCD2      | VF     |      |    |            |                             |                           |                               |      |
| 2         | HNMT        | VF     |      |    |            |                             |                           |                               |      |
| 2         | SBK1        | VF     |      |    |            |                             |                           |                               |      |
| 2         | RGPD1       | VF     |      |    |            |                             |                           |                               |      |
| 2         | BCL7A       | VF     |      |    |            |                             |                           |                               |      |
| 2         | ARPP21      | VF     |      |    |            |                             |                           |                               |      |
| 2         | CHI3L2      | VF     | X    |    |            |                             |                           |                               |      |
| 2         | CXorf65     | VF     |      |    |            |                             |                           |                               |      |
| 2         | ARHGAP30    | VF     |      |    |            |                             |                           |                               |      |
| 2         | SLC35F1     | VF     |      |    |            |                             |                           |                               |      |
| 2         | FBXO43      | VF     |      |    |            |                             |                           |                               |      |
| 2         | KIAA0101    | VF     |      |    |            |                             |                           |                               |      |
| Module ID | Gene Symbol | Tissue | eQTL | TF | Key Driver | Candidate gene in GWAS for: |                           |                               |      |
|           |             |        |      |    |            | CAD                         | Plasma glucose metabolism | Plasma cholesterol metabolism | T2DM |
| 2         | SPN         | VF     |      |    |            |                             |                           |                               |      |
| 2         | CERKL       | VF     |      |    |            |                             |                           |                               |      |
| 2         | MSRB3       | VF     |      |    |            |                             |                           |                               |      |
| 2         | RUNX3       | VF     |      | X  |            |                             |                           |                               |      |
| 2         | STXBP1      | VF     |      |    |            |                             |                           |                               |      |
| 2         | TMPO        | VF     |      |    |            |                             |                           |                               |      |
| 2         | MYCL1       | VF     |      | X  |            |                             |                           |                               |      |
| 2         | RRM2        | VF     |      |    |            |                             |                           |                               |      |
| 2         | FAM102A     | VF     |      |    |            |                             |                           |                               |      |
| 2         | ACPL2       | VF     |      |    |            |                             |                           |                               |      |
| 2         | SUSD4       | VF     |      |    |            |                             |                           |                               |      |
| 2         | CYFIP2      | VF     |      |    |            |                             |                           |                               |      |
| 2         | CTLA4       | VF     |      |    |            |                             |                           |                               |      |
| 2         | DIXDC1      | VF     |      |    |            |                             |                           |                               |      |
| 2         | PRPS2       | VF     |      |    |            |                             |                           |                               |      |
| 2         | SIRP6       | VF     |      |    |            |                             |                           |                               |      |
| 2         | SKA1        | VF     | X    |    | X          |                             |                           |                               |      |
| 2         | MTL5        | VF     |      |    |            |                             |                           |                               |      |
| 2         | ACBD7       | VF     |      |    |            |                             |                           |                               |      |
| 2         | D4S234E     | VF     |      |    |            |                             |                           |                               |      |
| 2         | OPALIN      | VF     |      |    |            |                             |                           |                               |      |
| 2         | SLAIN1      | VF     |      |    |            |                             |                           |                               |      |
| 2         | CENPA       | VF     |      |    |            |                             |                           |                               |      |
| 2         | MST4        | VF     |      |    |            |                             |                           |                               |      |
| 2         | DIAPH3      | VF     |      |    |            |                             |                           |                               |      |
| 2         | CD1E        | VF     |      |    |            |                             |                           |                               |      |
| 2         | MAPRK1      | VF     |      |    |            |                             |                           |                               |      |
| 2         | CAPSL       | VF     |      |    |            |                             |                           |                               |      |
| 2         | C19orf28    | VF     |      |    |            |                             |                           |                               |      |
| 2         | LCK         | VF     |      |    |            |                             |                           |                               |      |
| 2         | SLA         | VF     | X    |    |            |                             |                           |                               |      |
| 2         | SRD5A1      | VF     |      |    |            |                             |                           |                               |      |
| 2         | STIL        | VF     |      |    |            |                             |                           |                               |      |
| 2         | RCC1        | VF     |      |    |            |                             |                           |                               |      |
| 2         | UHRF1       | VF     |      | X  | X          |                             |                           |                               |      |
| 2         | REC8        | VF     |      |    |            |                             |                           |                               |      |
| 2         | TOP2A       | VF     |      |    |            |                             |                           |                               |      |
| 2         | SKAP1       | VF     |      | X  | X          |                             |                           |                               |      |
| 2         | ZAP70       | VF     |      |    |            |                             |                           |                               |      |
| 2         | IKZF2       | VF     |      | X  |            |                             |                           |                               |      |
| 2         | GYG2        | VF     |      |    |            |                             |                           |                               |      |
| 2         | ARHGAP9     | VF     |      |    |            |                             |                           |                               |      |
| 2         | FBXO41      | VF     |      |    |            |                             |                           |                               |      |
| 2         | CCDC88C     | VF     |      |    |            |                             |                           |                               |      |
| 2         | HSF5        | VF     |      | X  |            |                             |                           |                               |      |
| 2         | CC2D2A      | VF     | X    |    |            |                             |                           |                               |      |
| 2         | ARRDC5      | VF     |      |    |            |                             |                           |                               |      |
| 2         | PPP1R1C     | VF     |      |    |            |                             |                           |                               |      |
| 2         | CASC1       | VF     |      |    |            |                             |                           |                               |      |
| 2         | FGD3        | VF     |      |    |            |                             |                           |                               |      |
| 2         | DFNB31      | VF     |      |    |            |                             |                           |                               |      |
| 2         | BTLA        | VF     |      |    |            |                             |                           |                               |      |
| 2         | C17orf67    | VF     |      |    |            |                             |                           |                               |      |
| 2         | SFTPA1      | VF     |      |    |            |                             |                           |                               |      |
| 2         | GPR18       | VF     |      |    |            |                             |                           |                               |      |
| 2         | HDAC7       | VF     |      |    |            |                             |                           |                               |      |
| 2         | SFTPA2      | VF     |      |    |            |                             |                           |                               |      |
| 2         | TOX2        | VF     |      |    |            |                             |                           |                               |      |
| 2         | C9orf129    | VF     |      |    |            |                             |                           |                               |      |
| 2         | KIAA0748    | VF     |      |    |            |                             |                           |                               |      |
| 2         | TIFAB       | VF     |      |    |            |                             |                           |                               |      |
| 2         | FAMS4A      | VF     |      |    |            |                             |                           |                               |      |
| 2         | C12orf56    | VF     |      |    |            |                             |                           |                               |      |

| 2         | PSMB11      | VF     |      |    |            |                             |                           |                               |      |
|-----------|-------------|--------|------|----|------------|-----------------------------|---------------------------|-------------------------------|------|
| 2         | TROAP       | VF     |      |    |            |                             |                           |                               |      |
| 2         | CENPN       | VF     | X    |    |            |                             |                           |                               |      |
| 2         | PNMAL1      | VF     |      |    |            |                             |                           |                               |      |
| 2         | LAMA4       | VF     |      |    |            |                             |                           |                               |      |
| 2         | PLXNA4      | VF     |      |    |            |                             |                           |                               |      |
| 2         | GJB6        | VF     |      |    |            |                             |                           |                               |      |
| 2         | ACVR1C      | VF     |      |    |            |                             |                           |                               |      |
| 2         | EZR         | VF     |      |    |            |                             |                           |                               |      |
| 2         | FANCI       | VF     |      |    |            |                             |                           |                               |      |
| 2         | SEPT9       | VF     |      |    |            |                             |                           |                               |      |
| 2         | DEPDC1      | VF     |      |    |            |                             |                           |                               |      |
| 2         | CHEK1       | VF     |      |    |            |                             |                           |                               |      |
| 2         | FOXP3       | VF     |      | X  |            |                             |                           |                               |      |
| 2         | ITGAL       | VF     |      |    |            |                             |                           |                               |      |
| 2         | SH2D1A      | VF     |      |    |            |                             |                           |                               |      |
| 2         | BCOR        | VF     |      | X  |            |                             |                           |                               |      |
| 2         | PTGER3      | VF     |      |    |            |                             |                           |                               |      |
| 2         | RACGAP1     | VF     |      |    |            |                             |                           |                               |      |
| 2         | CEP55       | VF     |      |    |            |                             |                           |                               |      |
| 2         | CSK         | VF     |      |    |            |                             |                           |                               |      |
| 2         | GF11        | VF     |      |    |            |                             |                           |                               |      |
| 2         | FAM119A     | VF     | X    |    |            |                             |                           |                               |      |
| 2         | STXBP2      | VF     |      |    |            |                             |                           |                               |      |
| 2         | FXYD2       | VF     |      |    |            |                             |                           |                               |      |
| 2         | ASAH1       | VF     |      |    |            |                             |                           |                               |      |
| 2         | SPINK5      | VF     |      |    |            |                             |                           |                               |      |
| 2         | DTNA        | VF     |      |    |            |                             |                           |                               |      |
| 2         | RASGRP1     | VF     |      |    |            |                             |                           |                               | X    |
| 2         | NUSAP1      | VF     |      |    |            |                             |                           |                               |      |
| 2         | CCL20       | VF     |      |    |            |                             |                           |                               |      |
| 2         | MYB         | VF     |      | X  |            |                             |                           |                               |      |
| 2         | APBA2       | VF     |      |    |            |                             |                           |                               |      |
| 2         | CLGN        | VF     |      |    |            |                             |                           |                               |      |
| 2         | HMG2        | VF     |      | X  |            |                             |                           |                               |      |
| Module ID | Gene Symbol | Tissue | eQTL | TF | Key Driver | Candidate gene in GWAS for: |                           |                               |      |
|           |             |        |      |    |            | CAD                         | Plasma glucose metabolism | Plasma cholesterol metabolism | T2DM |
| 2         | IPCEF1      | VF     |      |    |            |                             |                           |                               |      |
| 2         | LEF1        | VF     |      | X  |            |                             |                           |                               |      |
| 2         | DNMT1       | VF     |      | X  | X          |                             |                           |                               |      |
| 2         | CDKN3       | VF     |      |    |            |                             |                           |                               |      |
| 2         | RAD51AP1    | VF     |      |    |            |                             |                           |                               |      |
| 2         | ARHGEF18    | VF     |      |    |            |                             |                           |                               |      |
| 2         | PLCH1       | VF     |      |    |            |                             |                           |                               |      |
| 2         | SATB1       | VF     |      | X  | X          |                             |                           |                               |      |
| 2         | SPOCK2      | VF     |      |    |            |                             |                           |                               |      |
| 2         | DDAH1       | VF     |      |    |            |                             |                           |                               |      |
| 2         | TCF7        | VF     |      | X  | X          |                             |                           |                               |      |
| 2         | FERMT2      | VF     |      |    |            |                             |                           |                               |      |
| 2         | SYK         | VF     |      |    |            |                             |                           |                               |      |
| 2         | MUC15       | VF     |      |    |            |                             |                           |                               |      |
| 2         | FAM60A      | VF     |      |    |            |                             |                           |                               |      |
| 2         | AGER        | VF     |      |    |            |                             |                           |                               |      |
| 2         | TMEM132C    | VF     | X    |    | X          |                             |                           |                               |      |
| 2         | LAX1        | VF     |      |    |            |                             |                           |                               |      |
| 2         | KANK2       | VF     |      |    |            |                             |                           |                               |      |
| 2         | C13orf77    | VF     |      |    |            |                             |                           |                               |      |
| 2         | FAM47E      | VF     |      |    |            |                             |                           |                               | X    |
| 2         | PARVG       | VF     |      |    |            |                             |                           |                               |      |
| 2         | FGF13       | VF     |      |    |            |                             |                           |                               |      |
| 2         | RNASEH2B    | VF     |      |    |            |                             |                           |                               |      |
| 2         | SEMA4D      | VF     |      |    |            |                             |                           |                               |      |
| 2         | FAIM3       | VF     |      |    |            |                             |                           |                               |      |
| 2         | C5orf13     | VF     |      |    |            |                             |                           |                               |      |
| 2         | RAD54L      | VF     |      |    |            |                             |                           |                               |      |
| 2         | HMMR        | VF     |      |    |            |                             |                           |                               |      |
| 2         | ULK2        | VF     |      |    |            |                             |                           |                               |      |
| 2         | FAM111B     | VF     |      |    |            |                             |                           |                               |      |
| 2         | CXCR3       | VF     |      |    |            |                             |                           |                               |      |
| 2         | MAPRE2      | VF     |      |    |            |                             |                           |                               |      |
| 2         | C12orf65    | VF     |      |    |            |                             |                           |                               |      |
| 2         | UNC93A      | VF     |      |    |            |                             |                           |                               |      |
| 2         | NDE1        | VF     |      |    |            |                             |                           |                               |      |
| 2         | CHRD1       | VF     |      |    |            |                             |                           |                               |      |
| 2         | RASSF7      | VF     |      |    |            |                             |                           |                               |      |
| 2         | LPXN        | VF     |      |    |            |                             |                           |                               |      |
| 2         | NPFFR2      | VF     |      |    |            |                             |                           |                               |      |
| 2         | NEODHL      | VF     |      |    |            |                             |                           |                               |      |
| 2         | DEPDC1B     | VF     |      |    |            |                             |                           |                               |      |
| 2         | ADAMDEC1    | VF     |      |    |            |                             |                           |                               |      |
| 2         | SLC17A8     | VF     |      |    |            |                             |                           |                               |      |
| 2         | CDK6        | VF     |      |    |            |                             |                           |                               |      |

| 2         | PLS1        | VF     |      |    |            |                             |                           |                               |      |
|-----------|-------------|--------|------|----|------------|-----------------------------|---------------------------|-------------------------------|------|
| 2         | MSL2        | VF     |      |    |            |                             |                           |                               |      |
| 2         | STMN1       | VF     |      |    |            |                             |                           |                               |      |
| 2         | C1orf228    | VF     |      |    |            |                             |                           |                               |      |
| 2         | CD8A        | VF     |      |    |            |                             |                           |                               |      |
| 2         | MKI67       | VF     |      |    |            |                             |                           |                               |      |
| 2         | SLC05A1     | VF     |      |    |            |                             |                           |                               |      |
| 2         | DLGAP5      | VF     |      |    |            |                             |                           |                               |      |
| 2         | FCRL1       | VF     |      |    |            |                             |                           |                               |      |
| 2         | FHL1        | VF     |      |    |            |                             |                           |                               |      |
| 2         | MGAT4A      | VF     |      |    |            |                             |                           |                               |      |
| 2         | CHFR        | VF     |      |    |            |                             |                           |                               |      |
| 2         | SH2D2A      | VF     |      |    |            |                             |                           |                               |      |
| 2         | TNIK        | VF     |      |    |            |                             |                           |                               |      |
| 2         | PYGL        | VF     |      |    |            |                             |                           |                               |      |
| 2         | RADS1       | VF     |      |    |            |                             |                           |                               |      |
| 2         | DLC1        | VF     |      |    |            |                             |                           |                               |      |
| 2         | SKA3        | VF     |      |    |            |                             |                           |                               |      |
| 2         | FRAS1       | VF     |      |    |            |                             |                           |                               |      |
| 2         | TRIP13      | VF     |      | X  |            |                             |                           |                               |      |
| 2         | SSX2IP      | VF     |      |    |            |                             |                           |                               |      |
| 2         | TTK         | VF     |      |    |            |                             |                           |                               |      |
| 2         | UGT3A2      | VF     |      |    |            |                             |                           |                               |      |
| 2         | TMEM135     | VF     |      |    |            |                             |                           |                               |      |
| 2         | TMIGD2      | VF     |      |    |            |                             |                           |                               |      |
| 2         | CDK1        | VF     |      |    |            |                             |                           |                               |      |
| 2         | BACH2       | VF     |      | X  | X          |                             |                           |                               |      |
| 2         | C3orf52     | VF     |      |    |            |                             |                           |                               |      |
| 2         | IL16        | VF     |      |    |            |                             |                           |                               |      |
| 2         | CELF5       | VF     |      |    |            |                             |                           |                               |      |
| 2         | CHST11      | VF     |      |    |            |                             |                           |                               |      |
| 2         | NLRP2       | VF     |      |    |            |                             |                           |                               |      |
| 2         | ARHGDB      | VF     |      |    |            |                             |                           |                               |      |
| 2         | WDR66       | VF     |      |    |            |                             |                           |                               |      |
| 2         | BHMT2       | VF     |      |    |            |                             |                           |                               |      |
| 2         | CDC45       | VF     |      |    |            |                             |                           |                               |      |
| 2         | CD19        | VF     |      |    |            |                             |                           |                               |      |
| 2         | CD8B        | VF     |      |    |            |                             |                           |                               |      |
| 2         | TFDP2       | VF     |      | X  |            |                             |                           |                               |      |
| 2         | SLAMF6      | VF     |      |    |            |                             |                           |                               |      |
| 2         | GHRH        | VF     |      |    |            |                             |                           |                               |      |
| 2         | FCRLA       | VF     |      |    |            |                             |                           |                               |      |
| 2         | NCKAP1L     | VF     |      |    |            |                             |                           |                               |      |
| 2         | SP110       | VF     |      |    |            |                             |                           |                               |      |
| 2         | CD22        | VF     |      |    |            |                             |                           |                               |      |
| 2         | GCT2        | VF     |      |    |            |                             |                           |                               |      |
| 2         | DOCK8       | VF     |      |    |            |                             |                           |                               |      |
| 2         | PLK4        | VF     |      |    |            |                             |                           |                               |      |
| 2         | ORC1        | VF     |      |    |            |                             |                           |                               |      |
| 2         | TRAF1       | VF     |      |    |            |                             |                           |                               |      |
| 2         | SYTL1       | VF     |      |    |            |                             |                           |                               |      |
| 2         | IKBKE       | VF     |      |    |            |                             |                           |                               |      |
| 2         | CORO1A      | VF     |      |    |            |                             |                           |                               |      |
| Module ID | Gene Symbol | Tissue | eQTL | TF | Key Driver | Candidate gene in GWAS for: |                           |                               |      |
|           |             |        |      |    |            | CAD                         | Plasma glucose metabolism | Plasma cholesterol metabolism | T2DM |
| 2         | PTPN22      | VF     |      |    |            |                             |                           |                               |      |
| 2         | TMT1C1      | VF     |      |    |            |                             |                           |                               |      |
| 2         | SLC1A4      | VF     |      |    |            |                             |                           |                               |      |
| 2         | RAB42       | VF     |      |    |            |                             |                           |                               |      |
| 2         | C11orf70    | VF     |      |    |            |                             |                           |                               |      |
| 2         | ANKRD44     | VF     |      |    |            |                             |                           |                               |      |
| 2         | TP53AIP1    | VF     |      |    |            |                             |                           |                               |      |
| 2         | FAM64A      | VF     |      |    |            |                             |                           |                               |      |
| 2         | HSDL2       | VF     |      |    |            |                             |                           |                               |      |
| 2         | LMNB1       | VF     |      |    |            |                             |                           |                               |      |
| 2         | HLA-DQB2    | VF     |      |    |            |                             |                           |                               |      |
| 2         | MYO16       | VF     |      |    |            |                             |                           |                               |      |
| 2         | SGK2        | VF     |      |    |            |                             |                           |                               |      |
| 2         | CHRNA6      | VF     |      |    |            |                             |                           |                               |      |
| 2         | PACSN1      | VF     |      |    |            |                             |                           |                               |      |
| 2         | TMEM56      | VF     |      |    |            |                             |                           |                               |      |
| 2         | PTPN7       | VF     |      |    |            |                             |                           |                               |      |
| 2         | CENPO       | VF     |      |    |            |                             |                           |                               |      |
| 2         | SPRR1A      | VF     |      |    |            |                             |                           |                               |      |
| 2         | BUB1B       | VF     |      |    |            |                             |                           |                               |      |
| 2         | CAV2        | VF     |      |    |            |                             |                           |                               |      |
| 2         | CCNA2       | VF     |      |    |            |                             |                           |                               |      |
| 2         | CDC6        | VF     |      |    |            |                             |                           |                               |      |
| 2         | CDC20       | VF     |      |    |            |                             |                           |                               |      |
| 2         | DGKA        | VF     |      |    |            |                             |                           |                               |      |
| 2         | ELF5        | VF     |      | X  |            |                             |                           |                               |      |
| 2         | FABP7       | VF     |      |    |            |                             |                           |                               |      |

| 2         | TNFRSF9     | VF     |      |    |            |                             |                           |                               |      |  |
|-----------|-------------|--------|------|----|------------|-----------------------------|---------------------------|-------------------------------|------|--|
| 2         | CXCR5       | VF     |      |    |            |                             |                           |                               |      |  |
| 2         | CAMM4       | VF     |      | X  | X          |                             |                           |                               |      |  |
| 2         | CCNF        | VF     |      |    |            |                             |                           |                               |      |  |
| 2         | CD1A        | VF     |      |    |            |                             |                           |                               |      |  |
| 2         | CD18        | VF     |      |    |            |                             |                           |                               |      |  |
| 2         | CD1C        | VF     |      |    |            |                             |                           |                               |      |  |
| 2         | CD1D        | VF     |      |    |            |                             |                           |                               |      |  |
| 2         | CD2         | VF     |      |    |            |                             |                           |                               |      |  |
| 2         | CD38        | VF     |      |    |            |                             |                           |                               |      |  |
| 2         | CD48        | VF     |      |    |            |                             |                           |                               |      |  |
| 2         | CDC25A      | VF     |      |    |            |                             |                           |                               |      |  |
| 2         | CDC25C      | VF     |      |    |            |                             |                           |                               |      |  |
| 2         | CDH2        | VF     |      |    |            |                             |                           |                               |      |  |
| 2         | CDKN2D      | VF     |      |    |            |                             |                           |                               |      |  |
| 2         | CDO1        | VF     |      |    |            |                             |                           |                               |      |  |
| 2         | CD52        | VF     |      |    |            |                             |                           |                               |      |  |
| 2         | CENPE       | VF     |      |    |            |                             |                           |                               |      |  |
| 2         | CKS2        | VF     |      |    |            |                             |                           |                               |      |  |
| 2         | CCR7        | VF     |      |    |            |                             |                           |                               |      |  |
| 2         | COL4A1      | VF     |      |    |            |                             |                           | X                             |      |  |
| 2         | CTRL        | VF     |      |    |            |                             |                           |                               |      |  |
| 2         | ETV6        | VF     |      | X  |            |                             |                           |                               |      |  |
| 2         | FGF2        | VF     |      |    |            |                             |                           |                               |      |  |
| 2         | GNAI1       | VF     |      |    |            |                             |                           |                               |      |  |
| 2         | GPX2        | VF     |      |    |            |                             |                           |                               |      |  |
| 2         | H2AFX       | VF     |      |    |            |                             |                           |                               |      |  |
| 2         | HMGAI1      | VF     |      | X  |            |                             |                           |                               |      |  |
| 2         | IRF8        | VF     |      | X  |            |                             |                           |                               |      |  |
| 2         | IL7R        | VF     |      |    |            |                             |                           |                               |      |  |
| 2         | INSM1       | VF     |      |    |            |                             |                           |                               |      |  |
| 2         | ACO1        | VF     |      |    |            |                             |                           |                               |      |  |
| 2         | KCNA3       | VF     |      |    |            |                             |                           |                               |      |  |
| 2         | KCNN4       | VF     |      |    |            |                             |                           |                               |      |  |
| 2         | KIF1        | VF     |      |    |            |                             |                           |                               |      |  |
| 2         | KRT13       | VF     |      |    |            |                             |                           |                               |      |  |
| 2         | KRT33B      | VF     |      |    |            |                             |                           |                               |      |  |
| 2         | LCP1        | VF     |      |    |            |                             |                           |                               |      |  |
| 2         | LCT         | VF     |      |    |            |                             |                           |                               |      |  |
| 2         | LTB         | VF     |      |    |            |                             |                           |                               |      |  |
| 2         | LY75        | VF     | X    |    |            |                             |                           |                               |      |  |
| 2         | MAD2L1      | VF     |      |    |            |                             |                           |                               |      |  |
| 2         | MAL         | VF     |      |    |            |                             |                           |                               |      |  |
| 2         | MATN2       | VF     |      |    |            |                             |                           |                               |      |  |
| 2         | MDM4        | VF     |      |    |            |                             |                           |                               |      |  |
| 2         | ME1         | VF     |      |    |            |                             |                           |                               |      |  |
| 2         | MEST        | VF     |      |    |            |                             |                           |                               |      |  |
| 2         | SCGB2A1     | VF     |      |    |            |                             |                           |                               |      |  |
| 2         | MYBL2       | VF     |      | X  |            |                             |                           |                               |      |  |
| 2         | MYH8        | VF     |      |    |            |                             |                           |                               |      |  |
| 2         | NEK2        | VF     |      |    |            |                             |                           |                               |      |  |
| 2         | NPTX1       | VF     |      |    |            |                             |                           |                               |      |  |
| 2         | P2RX5       | VF     |      |    |            |                             |                           |                               |      |  |
| 2         | PCNA        | VF     |      |    |            |                             |                           |                               |      |  |
| 2         | PDE7A       | VF     |      |    |            |                             |                           |                               |      |  |
| 2         | PI3         | VF     |      |    |            |                             |                           |                               |      |  |
| 2         | PK3CG       | VF     |      |    |            |                             |                           |                               |      |  |
| 2         | PMCH        | VF     |      |    |            |                             |                           |                               |      |  |
| 2         | PRKCB       | VF     |      |    |            |                             |                           |                               |      |  |
| 2         | PRKCG       | VF     |      |    |            |                             |                           |                               |      |  |
| 2         | PTK7        | VF     |      |    |            |                             |                           |                               |      |  |
| 2         | PTPN2       | VF     |      |    |            |                             |                           |                               |      |  |
| 2         | PTPN6       | VF     |      |    |            |                             |                           |                               |      |  |
| 2         | PTPRG       | VF     |      |    |            |                             |                           |                               |      |  |
| 2         | RAC2        | VF     | X    |    | X          |                             |                           |                               |      |  |
| 2         | RBMS2       | VF     |      |    |            |                             |                           |                               |      |  |
| 2         | RFC4        | VF     |      |    |            |                             |                           |                               |      |  |
| 2         | CCL22       | VF     |      |    |            |                             |                           |                               |      |  |
| 2         | SDC2        | VF     |      |    |            |                             |                           |                               |      |  |
| 2         | SH3GL3      | VF     |      |    |            |                             |                           |                               |      |  |
| 2         | SLAMF1      | VF     |      |    |            |                             |                           |                               |      |  |
| Module ID | Gene Symbol | Tissue | eQTL | TF | Key Driver | Candidate gene in GWAS for: |                           |                               |      |  |
| 2         | SOX4        | VF     | X    | X  |            | CAD                         | Plasma glucose metabolism | Plasma cholesterol metabolism | T2DM |  |
| 2         | SPIB        | VF     |      | X  | X          |                             |                           |                               |      |  |
| 2         | SPRR1B      | VF     |      |    |            |                             |                           |                               |      |  |
| 2         | SQLI        | VF     |      |    |            |                             |                           |                               |      |  |
| 2         | TIAM1       | VF     |      |    |            |                             |                           |                               |      |  |
| 2         | TXK         | VF     |      |    |            |                             |                           |                               |      |  |
| 2         | VRK1        | VF     |      |    |            |                             |                           |                               |      |  |
| 2         | CORO2A      | VF     |      |    |            |                             |                           |                               |      |  |
| 2         | SLC7A5      | VF     |      |    |            |                             |                           |                               |      |  |

|              |    |    |  |   |  |   |  |
|--------------|----|----|--|---|--|---|--|
| 2 AKAP1      | VF |    |  |   |  |   |  |
| 2 HIST1H2BG  |    | VF |  |   |  |   |  |
| 2 HIST1H3CVF |    |    |  |   |  |   |  |
| 2 HIST1H3I   | VF |    |  |   |  |   |  |
| 2 AURKA      | VF |    |  |   |  |   |  |
| 2 CDC42BPA   |    | VF |  |   |  |   |  |
| 2 DGKE       | VF |    |  |   |  |   |  |
| 2 CBX4       | VF | X  |  |   |  |   |  |
| 2 EXO1       | VF |    |  |   |  |   |  |
| 2 STX11      | VF |    |  |   |  |   |  |
| 2 HRK        | VF | X  |  |   |  |   |  |
| 2 MTMR1      | VF |    |  |   |  |   |  |
| 2 CDK5R1     | VF |    |  |   |  |   |  |
| 2 TIMELESS   | VF |    |  |   |  |   |  |
| 2 STBD1      | VF |    |  |   |  |   |  |
| 2 PRC1       | VF |    |  |   |  | X |  |
| 2 GJB2       | VF |    |  |   |  |   |  |
| 2 BNIP3      | VF |    |  |   |  |   |  |
| 2 E2F2       | VF | X  |  |   |  |   |  |
| 2 PTK2B      | VF |    |  |   |  |   |  |
| 2 FEN1       | VF | X  |  | X |  |   |  |
| 2 FLT3       | VF |    |  |   |  |   |  |
| 2 AURKB      | VF |    |  |   |  |   |  |
| 2 PTTG1      | VF | X  |  | X |  |   |  |
| 2 STK17B     | VF |    |  |   |  |   |  |
| 2 CYTIP      | VF |    |  |   |  |   |  |
| 2 TRAF4      | VF |    |  |   |  |   |  |
| 2 RHOH       | VF |    |  |   |  |   |  |
| 2 BUB1       | VF |    |  |   |  |   |  |
| 2 CDC25B     | VF |    |  |   |  |   |  |
| 2 CCR6       | VF |    |  |   |  |   |  |
| 2 DUSP2      | VF |    |  |   |  |   |  |
| 2 EPHB6      | VF |    |  |   |  |   |  |
| 2 EPS8       | VF |    |  |   |  |   |  |
| 2 EZH2       | VF | X  |  | X |  |   |  |
| 2 KIF11      | VF |    |  |   |  |   |  |
| 2 MCM2       | VF |    |  |   |  |   |  |
| 2 NFATC3     | VF | X  |  |   |  |   |  |
| 2 SDPR       | VF |    |  |   |  |   |  |

|            |    |    |   |
|------------|----|----|---|
| 2 RGN      | VF |    |   |
| 2 CCNB2    | VF |    |   |
| 2 ARHGEF1  | VF |    |   |
| 2 LPAR2    | VF |    |   |
| 2 NDST3    | VF |    |   |
| 2 GRAP2    | VF |    |   |
| 2 AIM2     | VF |    |   |
| 2 IL27RA   | VF |    |   |
| 2 KIF23    | VF |    |   |
| 2 IGDCC3   | VF |    |   |
| 2 AQP3     | VF |    |   |
| 2 DEFB4A   | VF |    |   |
| 2 DOCK2    | VF |    |   |
| 2 HDAC1    | VF | X  | X |
| 2 HMG1N1   | VF | X  |   |
| 2 JARID2   | VF | X  | X |
| 2 PLK1     | VF |    |   |
| 2 ATP2A3   | VF |    |   |
| 2 CBFA2T3  | VF | VF | X |
| 2 CD80     | VF | X  |   |
| 2 HIST1H1D | VF | VF |   |
| 2 HMGB3    | VF |    |   |
| 2 LMO7     | VF |    |   |
| 2 VAV1     | VF | X  |   |
| 2 ITK      | VF |    |   |
| 2 KRT6B    | VF |    |   |
| 2 KRT16    | VF |    |   |
| 2 LCP2     | VF |    |   |
| 2 ALDH6A1  | VF |    |   |
| 2 NHLH1    | VF | X  | X |
| 2 PTPRCAP  | VF |    |   |
| 2 ABCC9    | VF |    |   |
| 2 KIF20A   | VF |    |   |
| 2 ARL4C    | VF |    |   |
| 2 DDX39    | VF |    |   |
| 2 CD96     | VF |    |   |
| 2 HRSP12   | VF |    |   |
| 2 SLC23A1  | VF |    |   |
| 2 PRSS16   | VF |    |   |
| 2 FMNL1    | VF |    |   |

2 MCM4 VF  
2 MCM6 VF  
2 MCM7 VF

All\_modules

| 2         | IKZF1       | VF     |      | X  | X          |                             |                           |                               |      |
|-----------|-------------|--------|------|----|------------|-----------------------------|---------------------------|-------------------------------|------|
| 2         | KRT1        | VF     |      |    |            |                             |                           |                               |      |
| 2         | CD7         | VF     |      |    |            |                             |                           |                               |      |
| 2         | CD28        | VF     |      |    |            |                             |                           |                               |      |
| 2         | GPR19       | VF     |      |    |            |                             |                           |                               |      |
| 2         | LRMP        | VF     |      |    |            |                             |                           |                               |      |
| 2         | NEFL        | VF     |      |    |            |                             |                           |                               |      |
| Module ID | Gene Symbol | Tissue | eQTL | TF | Key Driver | Candidate gene in GWAS for: |                           |                               |      |
|           |             |        |      |    |            | CAD                         | Plasma glucose metabolism | Plasma cholesterol metabolism | T2DM |
| 2         | PCP4        | VF     |      |    |            |                             |                           |                               |      |
| 2         | POU4F1      | VF     |      | X  |            |                             |                           |                               |      |
| 2         | PRB3        | VF     |      |    |            |                             |                           |                               |      |
| 2         | PRKCO       | VF     |      |    |            |                             |                           |                               |      |
| 2         | TNFAIP3     | VF     |      |    |            |                             |                           |                               |      |
| 2         | TACC3       | VF     |      |    |            |                             |                           |                               |      |
| 2         | ZNF238      | VF     |      | X  |            |                             |                           |                               |      |
| 2         | CAP2        | VF     |      |    |            |                             |                           |                               |      |
| 2         | UBD         | VF     |      |    |            |                             |                           |                               |      |
| 2         | SPAG5       | VF     |      |    |            |                             |                           |                               |      |
| 2         | MCAM        | VF     |      |    |            |                             |                           |                               |      |
| 2         | CCR9        | VF     |      |    |            |                             |                           |                               |      |
| 2         | WASF3       | VF     |      |    |            |                             |                           |                               |      |
| 2         | NMU         | VF     |      |    |            |                             |                           |                               |      |
| 2         | CD6         | VF     |      |    |            |                             |                           |                               |      |
| 2         | MLL11       | VF     |      |    |            |                             |                           |                               |      |
| 2         | PKIA        | VF     |      |    |            |                             |                           |                               |      |
| 2         | KIF2C       | VF     |      |    |            |                             |                           |                               |      |
| 2         | SOX5        | VF     |      | X  |            |                             |                           |                               |      |
| 2         | TL4         | VF     |      |    |            |                             |                           |                               |      |
| 2         | UBE2C       | VF     |      |    |            |                             |                           |                               |      |
| 2         | PTPRT       | VF     |      |    |            |                             |                           |                               |      |
| 2         | CIT         | VF     |      |    |            |                             |                           |                               |      |
| 2         | GALNT6      | VF     |      |    |            |                             |                           |                               |      |
| 2         | OIP5        | VF     |      |    |            |                             |                           |                               |      |
| 2         | ICOS        | VF     |      |    |            |                             |                           |                               |      |
| 2         | ANGPTL2     | VF     |      |    |            |                             |                           |                               |      |
| 2         | STAP1       | VF     |      |    |            |                             |                           |                               |      |
| 2         | TPX2        | VF     |      |    |            |                             |                           |                               |      |
| 2         | EHF         | VF     |      | X  |            |                             |                           |                               |      |
| 2         | EPB41L1     | VF     |      |    |            |                             |                           |                               |      |
| 2         | MID2        | VF     |      |    |            |                             |                           |                               |      |
| 2         | RHOQ        | VF     |      |    |            |                             |                           |                               |      |
| 2         | LILRA4      | VF     |      |    |            |                             |                           |                               |      |
| 2         | ESPL1       | VF     |      |    |            |                             |                           |                               |      |
| 2         | HMHA1       | VF     |      |    |            |                             |                           |                               |      |
| 2         | PXDN        | VF     |      |    |            |                             |                           |                               |      |
| 2         | KIF4A       | VF     |      |    |            |                             |                           |                               |      |
| 2         | MMD         | VF     |      |    |            |                             |                           |                               |      |
| 2         | SERPINB13   | VF     |      |    |            |                             |                           |                               |      |
| 2         | STAG3       | VF     |      |    |            |                             |                           |                               |      |
| 2         | STEAP1      | VF     |      |    |            |                             |                           |                               |      |
| 2         | PSD4        | VF     |      |    |            |                             |                           |                               |      |
| 2         | IKZF3       | VF     |      | X  |            |                             |                           |                               |      |
| 2         | PCOLCE2     | VF     |      |    |            |                             |                           |                               |      |
| 2         | TRHDE       | VF     |      |    |            |                             |                           |                               |      |
| 2         | CD274       | VF     |      |    |            |                             |                           |                               |      |
| 2         | UBE2T       | VF     |      |    |            |                             |                           |                               |      |
| 2         | CD5         | VF     |      |    |            |                             |                           |                               |      |
| 2         | ADAM28      | VF     |      |    |            |                             |                           |                               |      |
| 2         | PDSS1       | VF     |      |    |            |                             |                           |                               |      |
| 2         | ORC6        | VF     |      |    |            |                             |                           |                               |      |
| 2         | DAPK2       | VF     |      |    |            |                             |                           |                               |      |
| 2         | SLC7A11     | VF     |      |    |            |                             |                           |                               |      |
| 2         | SMPX        | VF     |      |    |            |                             |                           |                               |      |
| 2         | LAMP3       | VF     |      |    |            |                             |                           |                               |      |
| 2         | LYPD3       | VF     |      |    |            |                             |                           |                               |      |
| 2         | SIT1        | VF     |      |    |            |                             |                           |                               |      |
| 2         | P2RY10      | VF     |      |    |            |                             |                           |                               |      |
| 2         | EDEM1       | VF     |      |    |            |                             |                           |                               |      |
| 2         | ACAP1       | VF     |      |    |            |                             |                           |                               |      |
| 2         | TOX         | VF     |      |    |            |                             |                           |                               |      |
| 2         | SERTAD2     | VF     |      | X  |            |                             |                           |                               |      |
| 2         | ARHGAP11A   | VF     |      |    |            |                             |                           |                               |      |
| 2         | JAKMIP2     | VF     |      |    |            |                             |                           |                               |      |
| 2         | MELK        | VF     |      |    |            |                             |                           |                               |      |
| 2         | RHOBTB1     | VF     |      |    |            |                             |                           |                               |      |
| 2         | ZBED4       | VF     |      |    |            |                             |                           |                               |      |
| 2         | NCAPD2      | VF     |      |    |            |                             |                           |                               |      |
| 2         | KIF14       | VF     |      |    |            |                             |                           |                               |      |
| 2         | RNF44       | VF     |      |    |            |                             |                           |                               |      |
| 2         | DIP2C       | VF     |      | X  | X          |                             |                           |                               |      |
| 2         | FNBP1       | VF     |      |    |            |                             |                           |                               |      |



| 2         | TLN2        | VF     |      |    |            |                             |                           |                               |      |
|-----------|-------------|--------|------|----|------------|-----------------------------|---------------------------|-------------------------------|------|
| 2         | SEPT6       | VF     |      |    |            |                             |                           |                               |      |
| 2         | PASK        | VF     |      |    |            |                             |                           |                               |      |
| 2         | DNAIC9      | VF     |      |    |            |                             |                           |                               |      |
| 2         | SIK2        | VF     |      |    |            |                             |                           |                               |      |
| 2         | KIAA0802    | VF     | X    |    |            |                             |                           |                               |      |
| 2         | ADCY6       | VF     |      |    |            |                             |                           |                               |      |
| 2         | TENC1       | VF     |      |    |            |                             |                           |                               |      |
| 2         | NCAPH       | VF     |      |    |            |                             |                           |                               |      |
| 2         | CZCD2       | VF     |      |    |            |                             |                           |                               |      |
| 2         | FAM169A     | VF     |      |    |            |                             |                           |                               |      |
| 2         | GMNN        | VF     |      |    |            |                             |                           |                               |      |
| 2         | GINS2       | VF     |      |    |            |                             |                           |                               |      |
| 2         | AMOTL2      | VF     |      |    |            |                             |                           |                               |      |
| 2         | BIN2        | VF     |      |    |            |                             |                           |                               |      |
| 2         | PCYOX1      | VF     |      |    |            |                             |                           |                               |      |
| 2         | UPB1        | VF     |      |    |            |                             |                           |                               |      |
| 2         | EVL         | VF     |      |    |            |                             |                           |                               |      |
| 2         | CENPF       | VF     | X    | X  | X          |                             |                           |                               |      |
| 2         | TRAT1       | VF     |      |    |            |                             |                           |                               |      |
| 2         | GTSE1       | VF     |      |    |            |                             |                           |                               |      |
| 2         | DTL         | VF     |      |    |            |                             |                           |                               |      |
| 2         | IL23A       | VF     |      |    |            |                             |                           |                               |      |
| 2         | GALNT7      | VF     |      |    |            |                             |                           |                               |      |
| 2         | KIF21B      | VF     |      |    |            |                             |                           |                               |      |
| Module ID | Gene Symbol | Tissue | eQTL | TF | Key Driver | Candidate gene in GWAS for: |                           |                               |      |
|           |             |        |      |    |            | CAD                         | Plasma glucose metabolism | Plasma cholesterol metabolism | T2DM |
| 2         | ERCC6L      | VF     |      |    |            |                             |                           |                               |      |
| 2         | TASP1       | VF     |      |    |            |                             |                           |                               |      |
| 2         | PALMD       | VF     |      |    |            |                             |                           |                               |      |
| 2         | LIME1       | VF     |      |    |            |                             |                           |                               |      |
| 2         | ACSM5       | VF     |      |    |            |                             |                           |                               |      |
| 2         | MOSCC2      | VF     |      |    |            |                             |                           |                               |      |
| 2         | C12orf48    | VF     |      |    |            |                             |                           |                               |      |
| 2         | FEZF2       | VF     |      |    |            |                             |                           |                               |      |
| 2         | OSBP1A      | VF     |      |    |            |                             |                           |                               |      |
| 2         | HELLS       | VF     |      |    |            |                             |                           |                               |      |
| 2         | NETO2       | VF     |      |    |            |                             |                           |                               |      |
| 2         | CDCA8       | VF     |      |    |            |                             |                           |                               |      |
| 2         | RFWD3       | VF     |      |    |            |                             |                           |                               |      |
| 2         | ASPM        | VF     |      |    |            |                             |                           |                               |      |
| 2         | ASF1B       | VF     |      |    |            |                             |                           |                               |      |
| 2         | C1orf112    | VF     |      |    |            |                             |                           |                               |      |
| 2         | DPPA4       | VF     |      |    |            |                             |                           |                               |      |
| 2         | NEIL3       | VF     |      |    |            |                             |                           |                               |      |
| 2         | C7orf43     | VF     |      |    |            |                             |                           |                               |      |
| 2         | PRR11       | VF     |      |    |            |                             |                           |                               |      |
| 2         | TBC1D19     | VF     |      |    |            |                             |                           |                               |      |
| 2         | ACER3       | VF     |      |    |            |                             |                           |                               |      |
| 2         | HJURP       | VF     |      |    |            |                             |                           |                               |      |
| 2         | EPB41L4B    | VF     |      |    |            |                             |                           |                               |      |
| 2         | RNF130      | VF     |      |    |            |                             |                           |                               |      |
| 2         | PAG1        | VF     |      |    |            |                             |                           |                               |      |
| 2         | ARHGAP15    | VF     |      |    |            |                             |                           |                               |      |
| 2         | PBK         | VF     |      |    |            |                             |                           |                               |      |
| 2         | MCM10       | VF     |      |    |            |                             |                           |                               |      |
| 2         | SLC16A10    | VF     |      |    |            |                             |                           |                               |      |
| 2         | MARK1       | VF     |      |    |            |                             |                           |                               |      |
| 2         | SMPD3       | VF     |      |    |            |                             |                           |                               |      |
| 2         | ANLN        | VF     |      |    |            |                             |                           |                               |      |
| 2         | SH3TC1      | VF     |      |    |            |                             |                           |                               |      |
| 2         | SASH3       | VF     |      |    |            |                             |                           |                               |      |
| 2         | SEPT3       | VF     |      |    |            |                             |                           |                               |      |
| 2         | CRTAM       | VF     |      |    |            |                             |                           |                               |      |
| 2         | IGLL1       | VF     |      |    |            |                             |                           |                               |      |
| 2         | PMEP1A      | VF     |      |    |            |                             |                           |                               |      |
| 2         | OTUD7B      | VF     |      |    |            |                             |                           |                               |      |
| 2         | KIF15       | VF     |      |    |            |                             |                           |                               |      |
| 2         | AKR1B10     | VF     |      |    |            |                             |                           |                               |      |
| 2         | LZTF1       | VF     |      |    |            |                             |                           |                               |      |
| 2         | NAT14       | VF     |      | X  | X          |                             |                           |                               |      |
| 2         | ATP6V0A4    | VF     |      |    |            |                             |                           |                               |      |
| 2         | SPC25       | VF     |      |    |            |                             |                           |                               |      |
| 2         | NLGN4X      | VF     |      |    |            |                             |                           |                               |      |
| 2         | MTA3        | VF     |      | X  |            |                             |                           |                               |      |
| 2         | PDP2        | VF     |      |    |            |                             |                           |                               |      |
| 2         | PITPNM2     | VF     |      |    |            |                             |                           |                               |      |
| 2         | LRRN1       | VF     |      |    |            |                             |                           |                               |      |
| 2         | WDF4        | VF     |      |    |            |                             |                           |                               |      |
| 2         | HIST1H2AE   | VF     |      |    |            |                             |                           |                               |      |
| 2         | HIST1H2BD   | VF     |      |    |            |                             |                           |                               |      |
| 2         | HIST1H2AJ   | VF     |      |    |            |                             |                           |                               |      |

| 2         | SPINK2      | VF     |      |    |            |                             |                           |                               |      |
|-----------|-------------|--------|------|----|------------|-----------------------------|---------------------------|-------------------------------|------|
| 2         | C6orf115    | VF     |      |    |            |                             |                           |                               |      |
| 2         | ENPP5       | VF     |      |    |            |                             |                           |                               |      |
| 2         | IL21R       | VF     |      |    |            |                             |                           |                               |      |
| 2         | MS4A1       | VF     |      |    |            |                             |                           |                               |      |
| 2         | FOXM1       | VF     |      | X  |            | X                           |                           |                               |      |
| 2         | SLC22A3     | VF     |      |    |            |                             |                           |                               |      |
| 2         | DEF6        | VF     |      |    |            |                             |                           |                               |      |
| 2         | GPM3        | VF     |      |    |            |                             |                           |                               |      |
| 2         | CENPK       | VF     |      |    |            |                             |                           |                               |      |
| 2         | EDAR        | VF     |      |    |            |                             |                           |                               |      |
| 2         | NCAPG       | VF     |      |    |            |                             |                           |                               |      |
| 2         | DNMT3A      | VF     |      |    |            |                             |                           |                               |      |
| 2         | TNS1        | VF     |      |    |            |                             |                           |                               |      |
| 2         | ELOVL4      | VF     |      |    |            |                             |                           |                               |      |
| 2         | FAM59A      | VF     | X    |    |            |                             |                           |                               |      |
| 2         | CCDC21      | VF     |      |    |            |                             |                           |                               |      |
| 2         | BCL11B      | VF     |      |    |            |                             |                           |                               |      |
| 2         | RASAL3      | VF     |      |    |            |                             |                           |                               |      |
| 2         | CENPH       | VF     |      |    |            |                             |                           |                               |      |
| 2         | MARCKSL1    | VF     |      |    |            |                             |                           |                               |      |
| 2         | HOXB4       | VF     |      |    | X          |                             |                           |                               |      |
| 2         | C1orf135    | VF     |      |    |            |                             |                           |                               |      |
| 2         | PVRIG       | VF     |      |    |            |                             |                           |                               |      |
| 2         | DSCC1       | VF     |      |    |            |                             |                           |                               |      |
| 2         | FA2H        | VF     |      |    |            |                             |                           |                               |      |
| 2         | PLA2G4A     | VF     |      |    |            |                             |                           |                               |      |
| 2         | ADIPOR2     | VF     |      |    |            |                             |                           |                               |      |
| 2         | ACSS3       | VF     |      |    |            |                             |                           |                               |      |
| 2         | NEIL1       | VF     |      |    |            |                             |                           |                               |      |
| 2         | MLF1IP      | VF     | X    |    |            |                             |                           |                               |      |
| 2         | GAL3ST4     | VF     |      |    |            |                             |                           |                               |      |
| 2         | C11orf80    | VF     |      |    | X          |                             | X                         |                               |      |
| 2         | E2F8        | VF     |      |    |            |                             |                           |                               |      |
| 2         | CLMN        | VF     |      |    |            |                             |                           |                               |      |
| 2         | SHCBP1      | VF     |      |    |            |                             |                           |                               |      |
| 2         | SNX22       | VF     |      |    |            |                             |                           |                               |      |
| 2         | MAP6D1      | VF     |      |    |            |                             |                           |                               |      |
| 2         | DENND1C     | VF     |      |    |            |                             |                           |                               |      |
| 2         | NUP210      | VF     |      |    |            |                             |                           |                               |      |
| 2         | ESRP2       | VF     |      |    |            |                             |                           |                               |      |
| 2         | HSPA12A     | VF     |      |    |            |                             |                           |                               |      |
| 2         | PIF1        | VF     |      |    |            |                             |                           |                               |      |
| Module ID | Gene Symbol | Tissue | eQTL | TF | Key Driver | Candidate gene in GWAS for: |                           |                               |      |
|           |             |        |      |    |            | CAD                         | Plasma glucose metabolism | Plasma cholesterol metabolism | T2DM |
| 2         | C17orf68    | VF     |      |    |            |                             |                           |                               |      |
| 2         | C13orf18    | VF     |      |    |            |                             |                           |                               |      |
| 2         | HKDC1       | VF     |      |    |            |                             |                           |                               |      |
| 2         | ATP10B      | VF     |      |    |            |                             |                           |                               |      |
| 2         | NINL        | VF     |      |    |            |                             |                           |                               |      |
| 2         | TRAF3IP3    | VF     |      |    | X          |                             |                           |                               |      |
| 2         | SLC19A3     | VF     |      |    |            |                             |                           | X                             |      |
| 2         | PBX4        | VF     |      |    |            |                             |                           |                               |      |
| 2         | LIMD2       | VF     |      |    |            |                             |                           |                               |      |
| 2         | BCL2L14     | VF     |      |    |            |                             |                           |                               |      |
| 2         | AKNA        | VF     | X    |    |            |                             |                           |                               |      |
| 2         | STK33       | VF     |      |    |            |                             |                           |                               |      |
| 2         | FAM83D      | VF     |      |    |            |                             |                           |                               |      |
| 2         | CDT1        | VF     |      |    |            |                             |                           |                               |      |
| 2         | KIF18A      | VF     |      |    |            |                             |                           |                               |      |
| 2         | CDCA3       | VF     |      |    |            |                             |                           |                               |      |
| 2         | NUF2        | VF     |      |    |            |                             |                           |                               |      |
| 2         | FERMT3      | VF     |      |    |            |                             |                           |                               |      |
| 2         | CDCA7       | VF     |      |    |            |                             |                           |                               |      |
| 2         | GSG2        | VF     |      |    |            |                             |                           |                               |      |
| 2         | CCNB1       | VF     |      |    |            |                             |                           |                               |      |
| 2         | MND1        | VF     |      |    |            |                             |                           |                               |      |
| 2         | SLA2        | VF     |      |    |            |                             |                           |                               |      |
| 2         | PSD2        | VF     |      |    |            |                             |                           |                               |      |
| 2         | GINS4       | VF     |      |    |            |                             |                           |                               |      |
| 2         | CSorf4      | VF     |      |    |            |                             |                           |                               |      |
| 2         | CARD11      | VF     |      |    |            |                             |                           |                               |      |
| 2         | KBTBD8      | VF     |      |    |            |                             |                           |                               |      |
| 2         | GPR174      | VF     |      |    |            |                             |                           |                               |      |
| 2         | SPINK7      | VF     |      |    |            |                             |                           |                               |      |
| 2         | RNASE7      | VF     |      |    |            |                             |                           |                               |      |
| 2         | SLC9A7      | VF     |      |    |            |                             |                           |                               |      |
| 2         | INA         | VF     |      |    |            |                             |                           |                               |      |
| 2         | BEST3       | VF     |      |    |            |                             |                           |                               |      |
| 2         | UBASH3B     | VF     |      |    |            |                             |                           |                               |      |
| 2         | ARHGAP19    | VF     |      |    |            |                             |                           | X                             |      |
| 2         | RAB11FIP4   | VF     |      |    |            |                             |                           |                               |      |

| 2         | SLC46A2     | VF     |      |    |            |                             |                           |                               |      |
|-----------|-------------|--------|------|----|------------|-----------------------------|---------------------------|-------------------------------|------|
| 2         | NKD2        | VF     |      |    |            |                             |                           |                               |      |
| 2         | ZNF101      | VF     |      |    |            |                             |                           |                               |      |
| 2         | SEPT1       | VF     |      |    |            |                             |                           |                               |      |
| 2         | STARD13     | VF     |      |    |            |                             |                           |                               |      |
| 2         | RCSO1       | VF     |      |    |            |                             |                           |                               |      |
| 2         | STK11IP     | VF     |      |    |            |                             |                           |                               |      |
| 2         | CLNK        | VF     |      |    |            |                             |                           |                               |      |
| 2         | CCNE2       | VF     |      |    |            |                             |                           |                               |      |
| 2         | CDCA5       | VF     |      |    |            |                             |                           |                               |      |
| 2         | NEURL2      | VF     |      |    |            |                             |                           |                               |      |
| 2         | RSPH1       | VF     |      |    |            |                             |                           |                               |      |
| 2         | CLEC4C      | VF     |      |    |            |                             |                           |                               |      |
| 2         | KLHL6       | VF     |      |    |            |                             |                           |                               |      |
| 2         | CSorf20     | VF     |      |    |            |                             |                           |                               |      |
| 2         | KCNQ3       | VF     |      |    |            |                             |                           |                               |      |
| 2         | PAQR8       | VF     |      |    |            |                             |                           |                               |      |
| 2         | RAVER1      | VF     |      |    |            |                             |                           |                               |      |
| 2         | BMPER       | VF     |      |    |            |                             |                           |                               |      |
| 2         | PTCRA       | VF     |      |    |            |                             |                           |                               |      |
| 2         | GLCC1       | VF     |      |    |            |                             |                           |                               |      |
| 2         | C7orf29     | VF     |      |    |            |                             |                           |                               |      |
| 2         | STARD4      | VF     |      |    |            |                             |                           |                               |      |
| 2         | LGH4        | VF     |      |    |            |                             |                           |                               |      |
| 2         | CASC5       | VF     |      |    |            |                             |                           |                               |      |
| 2         | ANKRD22     | VF     |      |    |            |                             |                           |                               |      |
| 2         | KCNH8       | VF     |      | X  |            |                             |                           |                               |      |
| 2         | A2ML1       | VF     |      |    |            |                             |                           | X                             |      |
| 2         | CCDC138     | VF     |      |    |            |                             |                           |                               |      |
| 2         | C1orf96     | VF     |      |    |            |                             |                           |                               |      |
| 2         | RTKN2       | VF     |      |    |            |                             |                           |                               |      |
| 2         | C15orf42    | VF     |      |    |            |                             |                           |                               |      |
| 2         | C16orf75    | VF     |      |    |            |                             |                           |                               |      |
| 2         | ERP27       | VF     |      |    |            |                             |                           |                               |      |
| 2         | PPIL5       | VF     |      |    |            |                             |                           |                               |      |
| 2         | SEPP2       | VF     |      |    |            |                             |                           |                               |      |
| 2         | TMEM155     | VF     |      |    |            |                             |                           |                               |      |
| 2         | C14orf145   | VF     |      |    |            |                             |                           |                               |      |
| 2         | TMC8        | VF     |      |    |            |                             |                           |                               |      |
| 2         | ENTHD1      | VF     |      |    |            |                             |                           |                               |      |
| 2         | CKAP2L      | VF     |      |    |            |                             |                           |                               |      |
| 2         | CDCA2       | VF     |      |    |            |                             |                           |                               |      |
| 2         | RASEF       | VF     |      |    |            |                             |                           |                               |      |
| 2         | FAM24B      | VF     |      |    |            |                             |                           |                               |      |
| 2         | SLC25A16    | VF     |      |    |            |                             |                           |                               |      |
| 2         | C10orf27    | VF     |      |    |            |                             |                           |                               |      |
| 2         | GPC2        | VF     |      |    |            |                             |                           |                               |      |
| 2         | TXLNB       | VF     |      |    |            |                             |                           |                               |      |
| 2         | MCOLN2      | VF     | X    |    |            |                             |                           |                               |      |
| 2         | ZCCHC24     | VF     |      |    |            |                             |                           |                               |      |
| 2         | ZNF367      | VF     |      | X  |            |                             |                           |                               |      |
| 2         | FAM26E      | VF     |      |    |            |                             |                           |                               |      |
| 2         | RAB39B      | VF     |      |    |            |                             |                           |                               |      |
| 2         | TRIM59      | VF     |      |    |            |                             |                           |                               |      |
| 2         | SLC35F3     | VF     |      |    |            |                             |                           |                               | X    |
| 2         | FAM117B     | VF     |      |    |            |                             |                           |                               |      |
| 2         | UNC5CL      | VF     |      |    |            |                             |                           |                               |      |
| 2         | PGM2L1      | VF     |      |    |            |                             |                           |                               |      |
| 2         | ATG9B       | VF     |      |    |            |                             |                           |                               |      |
| 2         | TIGIT       | VF     |      |    |            |                             |                           |                               |      |
| 2         | DLRAD3      | VF     |      |    |            |                             |                           |                               |      |
| Module ID | Gene Symbol | Tissue | eQTL | TF | Key Driver | Candidate gene in GWAS for: |                           |                               |      |
|           |             |        |      |    |            | CAD                         | Plasma glucose metabolism | Plasma cholesterol metabolism | T2DM |
| 2         | KLB         | VF     |      |    |            |                             |                           |                               |      |
| 2         | RASSF6      | VF     |      |    |            |                             |                           |                               |      |
| 2         | PLA2G4D     | VF     |      |    |            |                             |                           |                               |      |
| 2         | SESTD1      | VF     |      |    |            |                             |                           |                               |      |
| 2         | P2RX8       | VF     |      |    |            |                             |                           |                               |      |
| 2         | CSorf140    | VF     |      |    |            |                             |                           |                               |      |
| 2         | CMTM4       | VF     |      |    |            |                             |                           |                               |      |
| 2         | NLRC3       | VF     |      |    |            |                             |                           |                               |      |
| 2         | ITGA1       | VF     |      |    |            |                             |                           |                               |      |
| 2         | BMP8A       | VF     |      |    |            |                             |                           |                               |      |
| 2         | RASSF5      | VF     | X    |    | X          |                             |                           |                               |      |
| 2         | CYP2U1      | VF     |      |    |            |                             |                           |                               |      |
| 2         | IDO2        | VF     |      |    |            |                             |                           |                               |      |
| 2         | KIF24       | VF     |      |    |            |                             |                           |                               |      |
| 2         | SCML4       | VF     |      |    |            |                             |                           |                               |      |
| 2         | TBC1D10C    | VF     |      |    |            |                             |                           |                               |      |
| 2         | SP6         | VF     |      |    |            |                             |                           |                               |      |
| 2         | POLQ        | VF     |      |    |            |                             |                           |                               |      |
| 2         | E2F7        | VF     |      | X  | X          |                             |                           |                               |      |

| 2         | C9orf150     | VF     |      |    |            |                             |                           |                               |      |
|-----------|--------------|--------|------|----|------------|-----------------------------|---------------------------|-------------------------------|------|
| 2         | C10orf129    | VF     |      |    |            |                             |                           |                               |      |
| 2         | C11orf96     | VF     |      |    |            |                             |                           |                               |      |
| 2         | KRTPAP       | VF     |      |    |            |                             |                           |                               |      |
| 2         | XKRX         | VF     |      |    |            |                             |                           |                               |      |
| 2         | MIR155HG     | VF     |      |    |            |                             |                           |                               |      |
| 2         | AOX2P        | VF     |      |    |            |                             |                           |                               |      |
| 2         | LOC606724    | VF     |      |    |            |                             |                           |                               |      |
| 2         | DLEU2L       | VF     |      |    |            |                             |                           |                               |      |
| 2         | NAPSB        | VF     |      |    |            |                             |                           |                               |      |
| 2         | LRR37A4      | VF     |      |    |            |                             |                           |                               |      |
| 2         | LOC340508    | VF     |      |    |            |                             |                           |                               |      |
| 2         | DPY19L2P2    | VF     |      |    |            |                             |                           |                               |      |
| 2         | LOC440896    | VF     |      |    |            |                             |                           |                               |      |
| 2         | FLJ22536     | VF     |      |    |            |                             |                           |                               |      |
| 2         | CETN4P       | VF     |      |    |            |                             |                           |                               |      |
| 2         | GOLGA2B      | VF     |      |    |            |                             |                           |                               |      |
| 2         | LOC220930    | VF     |      |    |            |                             |                           |                               |      |
| 2         | LOC100188949 | VF     |      |    |            |                             |                           |                               |      |
| 2         | AQP7P3       | VF     |      |    |            |                             |                           |                               |      |
| 2         | NCRNA00287   | VF     |      |    |            |                             |                           |                               |      |
| 2         | C8orf51      | VF     |      |    |            |                             |                           |                               |      |
| 2         | LOC731789    | VF     |      |    |            |                             |                           |                               |      |
| 2         | C21orf96     | VF     |      |    |            |                             |                           |                               |      |
| 2         | NEURL3       | VF     |      |    |            |                             |                           |                               |      |
| 2         | LOC282997    | VF     |      |    |            |                             |                           |                               |      |
| 2         | LOC284749    | VF     |      |    |            |                             |                           |                               |      |
| 2         | LOC339524    | VF     |      |    |            |                             |                           |                               |      |
| 2         | C6orf147     | VF     |      |    |            |                             |                           |                               |      |
| 2         | LOC284551    | VF     |      |    |            |                             |                           |                               |      |
| 2         | C12orf32     | VF     |      |    |            |                             |                           |                               |      |
| 2         | LOC641518    | VF     |      |    |            |                             |                           |                               |      |
| 2         | MIRS67       | VF     |      |    |            |                             |                           |                               |      |
| 2         | LOC645638    | VF     |      |    |            |                             |                           |                               |      |
| 2         | LOC728724    | VF     |      |    |            |                             |                           |                               |      |
| 2         | LOC389906    | VF     |      |    |            |                             |                           |                               |      |
| 2         | LOC79015     | VF     | X    |    |            |                             |                           |                               |      |
| 2         | LOC149086    | VF     |      |    |            |                             |                           |                               |      |
| 2         | LOC729177    | VF     |      |    |            |                             |                           |                               |      |
| 2         | LOC439949    | VF     |      |    |            |                             |                           |                               |      |
| Module ID | Gene Symbol  | Tissue | eQTL | TF | Key Driver | Candidate gene in GWAS for: |                           |                               |      |
|           |              |        |      |    |            | CAD                         | Plasma glucose metabolism | Plasma cholesterol metabolism | T2DM |
| 3         | ACADS        | VF     |      |    |            |                             |                           |                               |      |
| 3         | ALAD         | VF     |      |    |            |                             |                           |                               |      |
| 3         | ASPA         | VF     |      |    |            |                             |                           |                               |      |
| 3         | ATM          | VF     |      | X  | X          |                             | X                         |                               | X    |
| 3         | BRCA2        | VF     |      |    |            |                             |                           |                               |      |
| 3         | BTD          | VF     |      |    |            |                             |                           |                               |      |
| 3         | CDKN1C       | VF     |      | X  | X          |                             |                           |                               |      |
| 3         | COL4A3       | VF     |      |    |            |                             |                           |                               |      |
| 3         | EDNRB        | VF     |      |    |            |                             |                           |                               |      |
| 3         | EPB42        | VF     |      |    |            |                             |                           |                               |      |
| 3         | GCH1         | VF     |      |    |            |                             |                           |                               | X    |
| 3         | LEP          | VF     |      |    |            |                             |                           |                               |      |
| 3         | SGCG         | VF     |      |    |            |                             |                           |                               |      |
| 3         | MSH2         | VF     |      |    |            |                             |                           |                               |      |
| 3         | PCCA         | VF     |      |    |            |                             |                           |                               |      |
| 3         | PLOD1        | VF     |      |    |            |                             |                           |                               |      |
| 3         | PMP22        | VF     |      |    |            |                             |                           |                               |      |
| 3         | PTH1R        | VF     |      |    |            |                             |                           |                               |      |
| 3         | QDPR         | VF     |      |    |            |                             |                           |                               |      |
| 3         | ROM1         | VF     |      |    |            |                             |                           |                               |      |
| 3         | ATXN7        | VF     |      |    |            |                             |                           |                               |      |
| 3         | COL5A2       | VF     |      |    |            |                             |                           |                               |      |
| 3         | AK1          | VF     |      |    |            |                             |                           |                               |      |
| 3         | FBP1         | VF     |      |    |            |                             |                           |                               |      |
| 3         | GPK1         | VF     |      |    |            |                             |                           |                               |      |
| 3         | AORF1        | VF     |      |    |            |                             |                           |                               |      |
| 3         | AGTR1        | VF     |      |    |            |                             |                           |                               |      |
| 3         | BLVRB        | VF     |      |    |            |                             |                           |                               |      |
| 3         | CRAT         | VF     |      |    |            |                             |                           |                               |      |
| 3         | IMPDH1       | VF     |      |    |            |                             |                           |                               |      |
| 3         | ITGA4        | VF     |      |    |            |                             |                           |                               |      |
| 3         | NQO1         | VF     |      |    |            |                             |                           |                               |      |
| 3         | NQO2         | VF     |      |    |            |                             |                           |                               |      |
| 3         | NPR1         | VF     |      |    |            |                             |                           |                               |      |
| 3         | PDE3B        | VF     |      |    |            |                             |                           |                               |      |
| 3         | PDE1B        | VF     |      |    |            |                             |                           |                               |      |
| 3         | PLA2G5       | VF     |      |    |            |                             |                           |                               |      |
| Module ID | Gene Symbol  | Tissue | eQTL | TF | Key Driver | Candidate gene in GWAS for: |                           |                               |      |
|           |              |        |      |    |            | CAD                         | Plasma glucose metabolism | Plasma cholesterol metabolism | T2DM |
| 3         | PRRG1        | VF     |      |    |            |                             |                           |                               |      |

|             |    |    |    |   |   |  |
|-------------|----|----|----|---|---|--|
| 3 ZDHHCL3   | VF |    |    |   |   |  |
| 3 ITIH5     | VF |    |    |   |   |  |
| 3 SMC4      | VF |    |    |   |   |  |
| 3 ANXA2     | VF |    |    |   |   |  |
| 3 TMEM200B  | VF |    | VF |   |   |  |
| 3 MGLL      | VF |    |    |   |   |  |
| 3 SMARCD3   | VF |    | VF |   | X |  |
| 3 PARVB     | VF | X  |    | X |   |  |
| 3 EVI2A     | VF |    |    |   |   |  |
| 3 FBLN2     | VF |    |    |   |   |  |
| 3 ZYG11A    | VF |    |    |   |   |  |
| 3 FGFRL1    | VF |    |    |   |   |  |
| 3 CLEC2D    | VF |    |    |   |   |  |
| 3 OR10T2    | VF |    |    |   |   |  |
| 3 CHD3      | VF |    |    |   |   |  |
| 3 B4GALT2   | VF |    |    |   |   |  |
| 3 SEMA3B    | VF |    |    |   |   |  |
| 3 FAM149A   | VF | VF | X  |   |   |  |
| 3 C1orf103  | VF |    |    |   |   |  |
| 3 NTRK2     | VF |    |    |   |   |  |
| 3 WDHD1     | VF |    |    |   |   |  |
| 3 GPX8      | VF |    |    |   |   |  |
| 3 MXRA7     | VF | X  |    |   |   |  |
| 3 RBPMS     | VF |    |    |   |   |  |
| 3 ERMN      | VF |    |    |   |   |  |
| 3 ZC3H12B   | VF |    |    |   |   |  |
| 3 ARHGEF10L | VF | VF |    |   |   |  |
| 3 AGPAT2    | VF |    |    |   |   |  |
| 3 MPST      | VF |    |    |   |   |  |
| 3 AGPHD1    | VF |    |    |   |   |  |
| 3 ZNF107    | VF |    |    |   |   |  |
| 3 DDR2      | VF |    |    |   |   |  |
| 3 ME3       | VF |    |    |   |   |  |
| 3 SAMD3     | VF |    |    |   |   |  |
| 3 USP1      | VF |    |    |   |   |  |
| 3 PRR5      | VF |    |    |   |   |  |
| 3 C2orf76   | VF |    |    |   |   |  |
| 3 SORBS3    | VF |    | X  |   |   |  |
| 3 PCK2      | VF |    |    |   |   |  |

|            |    |    |
|------------|----|----|
| 3 PIR      | VF | X  |
| 3 FANCB    | VF |    |
| 3 S100A13  | VF |    |
| 3 RAB3IP   | VF |    |
| 3 MECR     | VF |    |
| 3 TSPAN4   | VF |    |
| 3 TPD52    | VF |    |
| 3 CRELD1   | VF |    |
| 3 C19orf12 | VF |    |
| 3 FDX1L    | VF |    |
| 3 TMEM150A | VF | VF |
| 3 MMP28    | VF |    |
| 3 SLC35A2  | VF |    |
| 3 PJA1     | VF |    |
| 3 SPECC1   | VF |    |
| 3 DCLRE1C  | VF |    |
| 3 TRAF5    | VF |    |
| 3 AGAP1    | VF |    |
| 3 CDC42SE2 | VF | VF |
| 3 C20orf27 | VF |    |
| 3 EFEMP1   | VF |    |
| 3 ZBTB7C   | VF |    |
| 3 CD151    | VF |    |
| 3 ANGPTL4  | VF |    |
| 3 GPX4     | VF |    |
| 3 GPER     | VF |    |
| 3 MAPK3    | VF |    |
| 3 PALM     | VF |    |
| 3 SERPINB7 | VF |    |
| 3 FAM63A   | VF |    |
| 3 SPINK9   | VF |    |
| 3 SLC29A4  | VF |    |
| 3 SLC2A4   | VF |    |
| 3 C6orf204 | VF |    |
| 3 NUPR1    | VF |    |
| 3 C2orf88  | VF |    |
| 3 SMC2     | VF |    |
| 3 FIGNL1   | VF |    |
| 3 NTM      | VF |    |
| 3 TKT      | VF |    |

3 TUBB2AVF  
3 MOCS1 VF  
3 PKD1L2 VF

All\_modules

| 3         | GPBAR1       | VF     |      |    |            |                             |                           |                               |      |
|-----------|--------------|--------|------|----|------------|-----------------------------|---------------------------|-------------------------------|------|
| 3         | FAM127C      | VF     |      |    |            |                             |                           |                               |      |
| 3         | VAV3         | VF     |      |    |            |                             |                           |                               |      |
| 3         | PLIN4        | VF     |      |    |            |                             |                           |                               |      |
| 3         | WTIP         | VF     |      |    |            |                             |                           |                               |      |
| 3         | DNA2         | VF     |      |    |            |                             |                           |                               |      |
| 3         | CCDC150      | VF     |      |    |            |                             |                           |                               |      |
| 3         | SCN3A        | VF     |      |    |            |                             |                           |                               |      |
| 3         | ACACB        | VF     |      |    |            |                             |                           |                               |      |
| 3         | ANG          | VF     |      |    |            |                             |                           |                               |      |
| 3         | TMEM22       | VF     |      |    |            |                             |                           |                               |      |
| 3         | PEL3         | VF     |      |    |            |                             |                           |                               |      |
| 3         | KIF2A        | VF     |      |    |            |                             |                           |                               |      |
| 3         | FAM129C      | VF     |      |    |            |                             |                           |                               |      |
| 3         | CKAP2        | VF     | X    |    |            |                             |                           |                               |      |
| Module ID | Gene Symbol  | Tissue | eQTL | TF | Key Driver | Candidate gene in GWAS for: |                           |                               |      |
|           |              |        |      |    |            | CAD                         | Plasma glucose metabolism | Plasma cholesterol metabolism | T2DM |
| 3         | AKT1S1       | VF     |      |    |            |                             |                           |                               |      |
| 3         | C7orf68      | VF     |      |    |            |                             |                           |                               |      |
| 3         | CEP78        | VF     |      |    |            |                             |                           |                               |      |
| 3         | TMEM100      | VF     |      |    |            |                             |                           |                               |      |
| 3         | HOOK2        | VF     |      |    |            |                             |                           |                               |      |
| 3         | CABLES1      | VF     |      |    |            |                             |                           |                               |      |
| 3         | C4orf19      | VF     |      |    |            |                             |                           |                               |      |
| 3         | KIF13A       | VF     |      |    |            |                             |                           |                               |      |
| 3         | NUDT7        | VF     |      |    |            |                             |                           |                               |      |
| 3         | SYNPO        | VF     |      |    |            |                             |                           |                               |      |
| 3         | ADAM10       | VF     |      |    |            |                             |                           |                               |      |
| 3         | CNRIP1       | VF     |      |    |            |                             |                           |                               |      |
| 3         | PARP15       | VF     |      |    |            |                             |                           |                               |      |
| 3         | ZNF276       | VF     |      |    |            |                             |                           |                               |      |
| 3         | ARL17A       | VF     |      |    |            |                             |                           |                               |      |
| 3         | EPB49        | VF     |      |    |            |                             |                           |                               |      |
| 3         | ANKRD53      | VF     |      |    |            |                             |                           |                               |      |
| 3         | PLIN2        | VF     |      |    |            |                             |                           |                               |      |
| 3         | RPTN         | VF     |      |    |            |                             |                           |                               |      |
| 3         | MAPT         | VF     |      |    |            |                             |                           |                               |      |
| 3         | ADM          | VF     |      |    |            |                             |                           |                               |      |
| 3         | PABPC1L      | VF     |      |    |            |                             |                           |                               |      |
| 3         | CRY2         | VF     |      |    |            |                             |                           |                               |      |
| 3         | CRLS1        | VF     |      |    |            |                             | X                         |                               |      |
| 3         | NR1H3        | VF     |      | X  |            |                             |                           |                               |      |
| 3         | CDC7         | VF     |      |    |            |                             |                           | X                             |      |
| 3         | ELMOD3       | VF     |      |    |            |                             |                           |                               |      |
| 3         | JDP2         | VF     |      | X  |            |                             |                           |                               |      |
| 3         | MSRA         | VF     |      |    |            |                             |                           |                               |      |
| 3         | ANP32E       | VF     |      |    |            |                             |                           |                               |      |
| 3         | BCAP31       | VF     |      |    |            |                             |                           |                               |      |
| 3         | GPT2         | VF     |      |    |            |                             |                           |                               |      |
| 3         | C16orf45     | VF     |      |    |            |                             |                           |                               |      |
| 3         | FAM111A      | VF     |      |    |            |                             |                           |                               |      |
| 3         | FBXO5        | VF     |      |    |            |                             |                           |                               |      |
| 3         | LGALS12      | VF     |      |    |            |                             |                           |                               |      |
| 3         | ITPK1        | VF     |      |    |            |                             |                           |                               |      |
| 3         | FBXO15       | VF     |      |    |            |                             |                           |                               |      |
| 3         | WEE1         | VF     |      |    |            |                             |                           |                               |      |
| 3         | PHLD1        | VF     |      |    |            |                             |                           |                               |      |
| 3         | PLEKHG6      | VF     |      |    |            |                             |                           |                               |      |
| 3         | SCAI         | VF     |      | X  | X          |                             |                           |                               |      |
| 3         | WDR67        | VF     |      |    |            |                             |                           |                               |      |
| 3         | SLC1A5       | VF     |      |    |            |                             |                           |                               |      |
| 3         | ELF1         | VF     |      | X  |            |                             |                           |                               |      |
| 3         | PFKFB3       | VF     |      |    |            |                             |                           |                               |      |
| 3         | WFS1         | VF     |      |    |            |                             |                           |                               |      |
| 3         | PTGR1        | VF     |      |    |            |                             |                           |                               |      |
| 3         | AFAP1L1      | VF     |      |    |            |                             |                           |                               |      |
| 3         | KDM4C        | VF     | X    |    |            |                             |                           |                               |      |
| 3         | SLC22A4      | VF     |      |    |            |                             |                           |                               |      |
| 3         | AOC2         | VF     |      |    |            |                             |                           |                               |      |
| 3         | BR13         | VF     |      |    |            |                             |                           |                               |      |
| 3         | SGOL2        | VF     |      |    |            |                             |                           |                               |      |
| 3         | SAMD4A       | VF     |      |    |            |                             |                           |                               |      |
| 3         | ODZ1         | VF     |      |    |            |                             |                           |                               |      |
| 3         | MTF2         | VF     |      |    |            |                             |                           |                               |      |
| 3         | BIRC3        | VF     |      |    |            |                             |                           |                               |      |
| 3         | EMX2         | VF     |      | X  |            |                             |                           |                               |      |
| 3         | TMOD1        | VF     |      |    |            |                             |                           |                               |      |
| 3         | CGREF1       | VF     |      |    |            |                             |                           |                               |      |
| 3         | SPATA13      | VF     |      |    |            |                             |                           |                               |      |
| 3         | FAM59B       | VF     |      |    |            |                             |                           |                               |      |
| 3         | VSIG1        | VF     |      |    |            |                             |                           |                               |      |
| 3         | LOC100287428 | VF     |      |    |            |                             |                           |                               |      |



| 3         | STRBP       | VF     |      |    |            |                             |                           |                               |      |
|-----------|-------------|--------|------|----|------------|-----------------------------|---------------------------|-------------------------------|------|
| 3         | C5orf35     | VF     | X    |    | X          |                             |                           |                               |      |
| 3         | TK2         | VF     |      |    |            |                             |                           |                               |      |
| 3         | MAMLD1      | VF     |      |    |            |                             |                           |                               |      |
| 3         | VIT         | VF     |      |    |            |                             |                           |                               |      |
| 3         | SYNJ2       | VF     | X    |    |            |                             |                           |                               |      |
| 3         | CXorf57     | VF     |      |    |            |                             |                           |                               |      |
| 3         | NOL3        | VF     |      |    |            |                             |                           |                               |      |
| 3         | CORO2B      | VF     |      |    |            |                             |                           |                               |      |
| 3         | CYB5A       | VF     |      |    |            |                             |                           |                               |      |
| 3         | GRHL3       | VF     |      |    |            |                             |                           |                               |      |
| 3         | NASP        | VF     |      |    |            |                             |                           |                               |      |
| 3         | DCXR        | VF     |      |    |            |                             |                           |                               |      |
| 3         | IRF4        | VF     |      | X  |            |                             |                           |                               |      |
| 3         | GPR120      | VF     |      |    |            |                             |                           |                               |      |
| 3         | BTN2A2      | VF     |      |    |            |                             |                           |                               |      |
| 3         | DOK1        | VF     |      |    |            |                             |                           |                               |      |
| 3         | POLE2       | VF     |      |    |            |                             |                           |                               |      |
| 3         | SLC43A1     | VF     |      |    |            |                             |                           |                               |      |
| 3         | BMP1        | VF     |      |    |            |                             |                           |                               |      |
| 3         | ADCY5       | VF     |      |    |            |                             | X                         |                               |      |
| 3         | ARL2        | VF     |      |    |            |                             |                           |                               |      |
| 3         | ILDR1       | VF     |      |    |            |                             |                           |                               |      |
| 3         | BMP2        | VF     |      | X  |            |                             |                           |                               |      |
| 3         | SERPINH1    | VF     |      |    |            |                             |                           |                               |      |
| 3         | CBR3        | VF     |      |    |            |                             |                           |                               |      |
| 3         | CHD1        | VF     |      |    |            |                             |                           |                               |      |
| 3         | CIDEA       | VF     |      |    |            |                             |                           |                               |      |
| 3         | ECH1        | VF     |      |    |            |                             |                           |                               |      |
| 3         | FYB         | VF     |      |    |            |                             |                           |                               |      |
| 3         | HSPB2       | VF     |      |    |            |                             |                           |                               |      |
| 3         | CALB2       | VF     |      |    |            |                             |                           |                               |      |
| 3         | CD69        | VF     |      |    |            |                             |                           |                               |      |
| Module ID | Gene Symbol | Tissue | eQTL | TF | Key Driver | Candidate gene in GWAS for: |                           |                               |      |
|           |             |        |      |    |            | CAD                         | Plasma glucose metabolism | Plasma cholesterol metabolism | T2DM |
| 3         | CKB         | VF     |      |    |            |                             |                           |                               |      |
| 3         | CNTRF       | VF     |      |    |            |                             |                           |                               |      |
| 3         | COL4A2      | VF     |      |    |            | X                           |                           |                               |      |
| 3         | COX7A1      | VF     |      |    |            |                             |                           |                               |      |
| 3         | CPA1        | VF     |      |    |            |                             |                           |                               |      |
| 3         | CSN2        | VF     |      |    |            |                             |                           |                               |      |
| 3         | CFD         | VF     |      |    |            |                             |                           |                               |      |
| 3         | DSG1        | VF     |      |    |            |                             |                           |                               |      |
| 3         | ENO2        | VF     |      |    |            |                             |                           |                               |      |
| 3         | ACSL1       | VF     |      |    |            |                             |                           |                               |      |
| 3         | FLG         | VF     |      |    |            |                             |                           |                               |      |
| 3         | FMOD        | VF     |      |    |            |                             |                           |                               |      |
| 3         | GPX3        | VF     |      | X  |            |                             |                           |                               |      |
| 3         | GYPC        | VF     |      |    |            |                             |                           |                               |      |
| 3         | HOXB5       | VF     |      | X  |            |                             |                           |                               |      |
| 3         | INHBB       | VF     |      |    |            |                             |                           |                               |      |
| 3         | ITGB5       | VF     |      |    |            |                             |                           |                               |      |
| 3         | LAMB2       | VF     |      |    |            |                             |                           |                               |      |
| 3         | LRP1        | VF     |      |    |            |                             |                           | X                             |      |
| 3         | LRP5        | VF     |      |    |            |                             |                           |                               |      |
| 3         | LTBR        | VF     |      |    |            |                             |                           |                               |      |
| 3         | MAN2A1      | VF     |      |    |            |                             |                           |                               |      |
| 3         | MMP15       | VF     |      |    |            |                             |                           |                               |      |
| 3         | NID1        | VF     |      |    |            |                             |                           |                               |      |
| 3         | PKD2        | VF     |      |    |            |                             |                           |                               |      |
| 3         | PMM1        | VF     |      |    |            |                             |                           |                               |      |
| 3         | POLR2E      | VF     |      |    |            |                             |                           |                               |      |
| 3         | PRELP       | VF     |      |    |            |                             |                           |                               |      |
| 3         | HTRA1       | VF     |      |    |            |                             |                           |                               |      |
| 3         | PTPRC       | VF     |      |    |            |                             |                           |                               |      |
| 3         | REL         | VF     |      | X  |            |                             |                           |                               |      |
| 3         | SNCG        | VF     |      |    | X          |                             |                           |                               |      |
| 3         | SNTA1       | VF     | X    |    |            |                             |                           |                               |      |
| 3         | SOD3        | VF     |      |    |            |                             |                           |                               |      |
| 3         | SP4         | VF     |      | X  | X          |                             |                           |                               |      |
| 3         | SPR         | VF     |      |    |            |                             |                           |                               |      |
| 3         | TCF12       | VF     |      | X  |            |                             |                           |                               |      |
| 3         | THRSP       | VF     |      |    |            |                             |                           |                               |      |
| 3         | TIMP4       | VF     |      |    |            |                             |                           |                               |      |
| 3         | TM7SF2      | VF     |      |    |            |                             |                           |                               |      |
| 3         | TST         | VF     |      |    |            |                             |                           |                               |      |
| 3         | VEGFB       | VF     |      |    |            |                             |                           |                               |      |
| 3         | FZD5        | VF     |      |    |            |                             |                           |                               |      |
| 3         | TCAD2       | VF     |      | X  |            |                             |                           |                               |      |
| 3         | DDO         | VF     |      |    |            |                             |                           |                               |      |
| 3         | CAMK1       | VF     |      |    |            |                             |                           |                               |      |
| 3         | CDC14A      | VF     |      |    |            |                             |                           |                               |      |

| 3         | PPAP2A      | VF     |      |    |            |                             |                           |                               |      |
|-----------|-------------|--------|------|----|------------|-----------------------------|---------------------------|-------------------------------|------|
| 3         | CTS5        | VF     |      |    |            |                             |                           |                               |      |
| 3         | TNFSF12     | VF     |      |    |            |                             |                           |                               |      |
| 3         | RGS11       | VF     |      |    |            |                             |                           |                               |      |
| 3         | AP1G2       | VF     |      |    |            |                             |                           |                               |      |
| 3         | MAP3K14     | VF     |      |    |            |                             |                           |                               |      |
| 3         | ARRB1       | VF     |      |    |            |                             |                           |                               |      |
| 3         | DUSP3       | VF     |      |    |            |                             |                           |                               |      |
| 3         | ECHS1       | VF     |      |    |            |                             |                           |                               |      |
| 3         | EIF4EBP1    | VF     |      |    |            |                             |                           |                               |      |
| 3         | SERPINB9    | VF     |      |    |            |                             |                           |                               |      |
| 3         | TRIP10      | VF     |      |    |            |                             |                           |                               |      |
| 3         | BAG3        | VF     |      |    |            |                             |                           |                               |      |
| 3         | NFE2L3      | VF     |      | X  |            |                             |                           |                               |      |
| 3         | BPHL        | VF     |      |    |            |                             |                           |                               |      |
| 3         | DTX1        | VF     |      | X  |            |                             |                           |                               |      |
| 3         | EFNB1       | VF     |      |    |            |                             |                           |                               |      |
| 3         | GALNT3      | VF     |      |    |            |                             |                           |                               |      |
| 3         | LIN7A       | VF     |      |    |            |                             |                           |                               |      |
| 3         | DGKI        | VF     |      |    |            |                             |                           |                               |      |
| 3         | DHRS3       | VF     |      |    |            |                             |                           |                               |      |
| 3         | NUMBL       | VF     |      |    |            |                             |                           |                               |      |
| 3         | BZRAP1      | VF     |      |    |            |                             |                           |                               |      |
| 3         | STR17A      | VF     |      |    |            |                             |                           |                               |      |
| 3         | RASA12      | VF     |      |    |            |                             |                           |                               |      |
| 3         | AKAP5       | VF     |      |    |            |                             |                           |                               |      |
| 3         | CDKN2B      | VF     |      |    |            | X                           |                           |                               | X    |
| 3         | DAPK1       | VF     |      |    |            |                             |                           |                               |      |
| 3         | ENPP3       | VF     |      |    |            |                             |                           |                               |      |
| 3         | FXYP1       | VF     |      |    |            |                             |                           |                               |      |
| 3         | CEBPB       | VF     |      | X  |            |                             |                           |                               |      |
| 3         | GPT         | VF     |      |    |            |                             |                           |                               |      |
| 3         | LIPE        | VF     |      |    |            |                             |                           |                               |      |
| 3         | MPL         | VF     |      |    |            |                             |                           |                               |      |
| 3         | KCNE3       | VF     | X    |    |            |                             |                           |                               |      |
| 3         | IVL         | VF     |      |    |            |                             |                           |                               |      |
| 3         | LMNA        | VF     |      |    |            |                             |                           |                               |      |
| 3         | MDF1        | VF     |      |    |            |                             |                           |                               |      |
| 3         | UBXN8       | VF     |      |    |            |                             |                           |                               |      |
| 3         | ABCB6       | VF     |      |    |            |                             |                           |                               |      |
| 3         | GLYAT       | VF     |      |    |            |                             |                           |                               |      |
| 3         | FSTL3       | VF     |      |    |            |                             |                           |                               |      |
| 3         | MTLX        | VF     |      |    |            |                             |                           |                               |      |
| 3         | SLC25A1     | VF     |      |    |            |                             |                           |                               |      |
| 3         | ARID1A      | VF     |      | X  |            |                             |                           |                               |      |
| 3         | TNIP1       | VF     |      |    |            |                             |                           |                               |      |
| 3         | MYL9        | VF     |      |    |            |                             |                           |                               |      |
| 3         | NDC80       | VF     |      |    |            |                             |                           |                               |      |
| 3         | ACAA2       | VF     |      |    |            |                             |                           |                               |      |
| 3         | NNMT        | VF     |      |    |            |                             |                           |                               |      |
| 3         | NPY5R       | VF     |      |    |            |                             |                           |                               |      |
| Module ID | Gene Symbol | Tissue | eQTL | TF | Key Driver | Candidate gene in GWAS for: |                           |                               |      |
|           |             |        |      |    |            | CAD                         | Plasma glucose metabolism | Plasma cholesterol metabolism | T2DM |
| 3         | NUCB1       | VF     |      |    |            |                             |                           |                               |      |
| 3         | PRKCD       | VF     |      |    |            |                             |                           |                               |      |
| 3         | PRKCH       | VF     |      |    |            |                             |                           |                               |      |
| 3         | RAS         | VF     |      |    |            |                             |                           |                               |      |
| 3         | S100B       | VF     |      |    |            |                             |                           |                               |      |
| 3         | ST3GAL4     | VF     |      |    |            |                             |                           | X                             |      |
| 3         | GAS2L1      | VF     |      |    |            |                             |                           |                               |      |
| 3         | LGALS2      | VF     | X    |    |            |                             |                           |                               |      |
| 3         | IGF2BP3     | VF     |      |    |            |                             |                           |                               |      |
| 3         | KIF1C       | VF     |      |    |            |                             |                           |                               |      |
| 3         | NES         | VF     |      |    |            |                             |                           |                               |      |
| 3         | MMP24       | VF     |      |    |            |                             |                           |                               |      |
| 3         | DBF4        | VF     |      |    |            |                             |                           |                               |      |
| 3         | SYNGAP1     | VF     |      |    |            |                             |                           |                               |      |
| 3         | CDC42EP2    | VF     |      |    |            |                             |                           |                               |      |
| 3         | KDEL3       | VF     |      |    |            |                             |                           |                               |      |
| 3         | RAB31       | VF     | X    |    |            |                             |                           |                               |      |
| 3         | DNMT3B      | VF     |      | X  |            |                             |                           |                               |      |
| 3         | ALX1        | VF     |      | X  |            |                             |                           |                               |      |
| 3         | C10orf10    | VF     |      |    |            |                             |                           |                               |      |
| 3         | TOPBP1      | VF     |      |    |            |                             |                           |                               |      |
| 3         | KLF12       | VF     |      | X  |            |                             |                           |                               |      |
| 3         | PAXIP1      | VF     | X    |    |            |                             |                           |                               |      |
| 3         | DGAT1       | VF     |      |    |            |                             |                           |                               |      |
| 3         | PTRF        | VF     |      | X  | X          |                             |                           |                               |      |
| 3         | MAPRE3      | VF     |      |    |            |                             |                           |                               |      |
| 3         | TSPAN15     | VF     |      |    |            |                             |                           |                               |      |
| 3         | PHLDA3      | VF     |      |    |            |                             |                           |                               |      |
| 3         | GPR171      | VF     |      |    |            |                             |                           |                               |      |

| 3         | DMGDH       | VF     |      |    |            |                             |                           |                               |      |
|-----------|-------------|--------|------|----|------------|-----------------------------|---------------------------|-------------------------------|------|
| 3         | STGGALNAC6  | VF     |      |    |            |                             |                           |                               |      |
| 3         | DDAH2       | VF     | X    |    | X          |                             |                           |                               |      |
| 3         | FLVCR1      | VF     |      |    |            |                             |                           |                               |      |
| 3         | MACROD1     | VF     |      |    |            |                             |                           |                               |      |
| 3         | KLF15       | VF     | X    |    |            |                             |                           |                               |      |
| 3         | ATAD2       | VF     | X    |    | X          |                             |                           |                               |      |
| 3         | IMPA2       | VF     |      |    |            |                             |                           |                               |      |
| 3         | RAGE        | VF     |      |    |            |                             |                           |                               |      |
| 3         | ADAMTS2     | VF     |      |    |            |                             |                           |                               |      |
| 3         | DAPP1       | VF     |      |    |            |                             |                           |                               |      |
| 3         | HSPB7       | VF     |      |    |            |                             |                           |                               |      |
| 3         | SRPX2       | VF     |      |    |            |                             |                           |                               |      |
| 3         | RHOD        | VF     |      |    |            |                             |                           |                               |      |
| 3         | SLC2A8      | VF     |      |    |            |                             |                           |                               |      |
| 3         | KCNIP2      | VF     |      |    |            |                             |                           |                               |      |
| 3         | DOCK10      | VF     |      |    |            |                             |                           |                               |      |
| 3         | KNTC1       | VF     |      |    |            |                             |                           |                               |      |
| 3         | SV2A        | VF     |      |    |            |                             |                           |                               |      |
| 3         | ABLIM3      | VF     |      |    |            |                             |                           |                               |      |
| 3         | PDZRN3      | VF     |      |    |            |                             |                           |                               |      |
| 3         | ARAP2       | VF     |      |    |            |                             |                           |                               |      |
| 3         | DHRS7B      | VF     |      |    |            |                             |                           |                               |      |
| 3         | TSKU        | VF     |      |    |            |                             |                           |                               |      |
| 3         | OS9PL3      | VF     |      |    |            |                             |                           |                               |      |
| 3         | DENND2A     | VF     |      |    |            |                             |                           |                               |      |
| 3         | GOS2        | VF     |      |    |            |                             |                           |                               |      |
| 3         | COL5A3      | VF     |      |    |            |                             |                           |                               |      |
| 3         | YBX2        | VF     |      |    |            |                             |                           |                               |      |
| 3         | CRLF3       | VF     |      |    |            |                             |                           |                               |      |
| 3         | ABHD5       | VF     |      |    |            |                             |                           |                               |      |
| 3         | GLRX2       | VF     |      |    |            |                             |                           |                               |      |
| 3         | RASD1       | VF     |      |    |            | X                           |                           |                               |      |
| 3         | AIG1        | VF     |      |    |            |                             |                           |                               |      |
| 3         | FGCP        | VF     |      |    |            |                             |                           |                               |      |
| 3         | CY5R2       | VF     |      |    |            |                             |                           |                               |      |
| 3         | RAB6B       | VF     |      |    |            |                             |                           |                               |      |
| 3         | EFEMP2      | VF     |      |    |            |                             |                           |                               |      |
| 3         | OPLAH       | VF     |      |    |            |                             |                           |                               |      |
| 3         | MFSO6       | VF     |      |    |            |                             |                           |                               |      |
| 3         | NCAPG2      | VF     |      |    |            |                             |                           |                               |      |
| 3         | CCDC99      | VF     |      |    |            |                             |                           |                               |      |
| 3         | RGS3        | VF     |      |    |            |                             |                           |                               |      |
| 3         | C1orf56     | VF     |      |    |            |                             |                           |                               |      |
| 3         | CCDC109B    | VF     |      |    |            |                             |                           |                               |      |
| 3         | TTC38       | VF     |      |    |            |                             |                           |                               |      |
| 3         | CUEDC1      | VF     |      |    |            |                             |                           |                               |      |
| 3         | ZWILCH      | VF     |      |    |            |                             |                           |                               |      |
| 3         | YEATS2      | VF     |      |    |            |                             |                           |                               |      |
| 3         | RADIL       | VF     |      |    |            |                             |                           |                               |      |
| 3         | MAP7D1      | VF     |      |    |            |                             |                           |                               |      |
| 3         | ARHGEF40    | VF     |      |    |            |                             |                           |                               |      |
| 3         | ANO10       | VF     |      |    |            |                             |                           |                               |      |
| 3         | ECT2        | VF     |      |    |            |                             |                           |                               |      |
| 3         | CEP72       | VF     |      |    |            |                             |                           |                               |      |
| 3         | N4BP2       | VF     |      |    |            |                             |                           |                               |      |
| 3         | TMEM140     | VF     |      |    |            |                             | X                         |                               |      |
| 3         | LAR96       | VF     |      |    |            |                             |                           |                               |      |
| 3         | AGPAT5      | VF     |      |    |            |                             |                           |                               |      |
| 3         | NIPSNAP3B   | VF     |      |    |            |                             |                           | X                             |      |
| 3         | C4orf21     | VF     |      |    |            |                             |                           |                               |      |
| 3         | C17orf79    | VF     |      |    |            |                             |                           |                               |      |
| 3         | DOK5        | VF     |      |    |            |                             |                           |                               |      |
| 3         | MESP1       | VF     | X    |    | X          |                             |                           |                               |      |
| 3         | HOXB6       | VF     | X    |    |            |                             |                           |                               |      |
| 3         | TBC1D16     | VF     |      |    |            |                             |                           |                               |      |
| 3         | ADAMTSL4    | VF     |      |    |            |                             |                           |                               |      |
| 3         | ABCA7       | VF     |      |    |            |                             |                           |                               |      |
| 3         | SEMA3G      | VF     |      |    |            |                             |                           |                               |      |
| Module ID | Gene Symbol | Tissue | eQTL | TF | Key Driver | Candidate gene in GWAS for: |                           |                               |      |
|           |             |        |      |    |            | CAD                         | Plasma glucose metabolism | Plasma cholesterol metabolism | T2DM |
| 3         | WDR93       | VF     |      |    |            |                             |                           |                               |      |
| 3         | FAM20C      | VF     |      |    |            |                             |                           |                               |      |
| 3         | JPH1        | VF     |      |    |            |                             |                           |                               |      |
| 3         | DECR2       | VF     |      |    |            |                             |                           |                               |      |
| 3         | SLC24A3     | VF     |      |    |            |                             |                           |                               |      |
| 3         | ARHGAP20    | VF     |      |    |            |                             |                           |                               |      |
| 3         | KIAA1524    | VF     |      |    |            |                             |                           |                               |      |
| 3         | NMB         | VF     |      |    |            |                             |                           |                               |      |
| 3         | POLR2L      | VF     |      |    |            |                             |                           |                               |      |
| 3         | TP53NP2     | VF     |      |    |            |                             |                           |                               |      |
| 3         | FADS3       | VF     |      |    |            |                             |                           | v                             |      |

|            |    |   |   |   |  |   |  |  |
|------------|----|---|---|---|--|---|--|--|
| 3 AVPI1    | VF |   |   |   |  |   |  |  |
| 3 ZNF711   | VF |   | X | X |  |   |  |  |
| 3 CUZD1    | VF |   |   |   |  |   |  |  |
| 3 TIA1     | VF |   |   |   |  |   |  |  |
| 3 MTBP     | VF |   |   |   |  |   |  |  |
| 3 ABHD4    | VF |   |   |   |  |   |  |  |
| 3 TNN      | VF |   |   |   |  |   |  |  |
| 3 CLSTN2   | VF |   |   |   |  |   |  |  |
| 3 TNS3     | VF |   |   |   |  | X |  |  |
| 3 MPHOSPH9 | VF |   |   |   |  |   |  |  |
| 3 LYNX1    | VF |   |   |   |  |   |  |  |
| 3 VKORC1   | VF |   |   |   |  |   |  |  |
| 3 DHRS11   | VF |   |   |   |  |   |  |  |
| 3 IRX6     | VF | X | X |   |  |   |  |  |
| 3 CEP97    | VF |   |   |   |  |   |  |  |
| 3 OCEL1    | VF |   |   |   |  |   |  |  |
| 3 TMEM53   | VF |   |   |   |  |   |  |  |
| 3 PLEKHF2  | VF |   |   |   |  |   |  |  |
| 3 ANKRD55  | VF |   |   |   |  |   |  |  |
| 3 C11orf67 | VF |   |   |   |  |   |  |  |
| 3 ECHDC3   | VF |   |   |   |  |   |  |  |
| 3 C1orf115 | VF |   |   |   |  |   |  |  |
| 3 ASAM     | VF |   |   |   |  |   |  |  |
| 3 AGLB2    | VF |   |   |   |  |   |  |  |
| 3 C13orf34 | VF |   |   |   |  |   |  |  |
| 3 ATAD5    | VF |   |   |   |  |   |  |  |
| 3 DHDDS    | VF |   |   |   |  |   |  |  |
| 3 FBXO17   | VF |   |   |   |  |   |  |  |
| 3 RMI1     | VF |   |   |   |  |   |  |  |
| 3 UBTD1    | VF |   |   |   |  |   |  |  |
| 3 ATF7IP2  | VF |   |   |   |  |   |  |  |
| 3 ACSF2    | VF |   |   |   |  |   |  |  |
| 3 PIGZ     | VF |   |   |   |  |   |  |  |
| 3 APOL6    | VF |   |   |   |  |   |  |  |
| 3 FCRL2    | VF |   |   |   |  |   |  |  |
| 3 GDPD5    | VF |   |   |   |  |   |  |  |
| 3 WBSCR16  | VF |   |   |   |  |   |  |  |
| 3 ADAMTS12 | VF |   |   |   |  |   |  |  |
| 3 C1QTNF1  | VF |   |   |   |  |   |  |  |



3 RBM11 VF  
3 ALG14 VF  
3 C11orf82 VF

All\_modules



| 3         | PRKCD8P      | VF     |      |    |            |                             |                           |                               |      |
|-----------|--------------|--------|------|----|------------|-----------------------------|---------------------------|-------------------------------|------|
| 3         | OSCP1        | VF     |      |    |            |                             |                           |                               |      |
| 3         | ZBTB47       | VF     |      |    |            |                             |                           |                               |      |
| 3         | TIGD1        | VF     |      |    |            |                             |                           |                               |      |
| 3         | FAM110B      | VF     |      |    |            |                             |                           |                               |      |
| Module ID | Gene Symbol  | Tissue | eQTL | TF | Key Driver | Candidate gene in GWAS for: |                           |                               |      |
|           |              |        |      |    |            | CAD                         | Plasma glucose metabolism | Plasma cholesterol metabolism | T2DM |
| 3         | CDC42EP1     | VF     |      |    |            |                             |                           |                               |      |
| 3         | ZNF439       | VF     |      |    |            |                             |                           |                               |      |
| 3         | ELOVL3       | VF     |      |    |            |                             |                           |                               |      |
| 3         | ANKRD9       | VF     |      |    |            |                             |                           |                               |      |
| 3         | ACOT4        | VF     |      |    |            |                             |                           |                               |      |
| 3         | CLDN2        | VF     |      | X  |            |                             |                           |                               |      |
| 3         | TBX15        | VF     |      |    |            |                             |                           |                               |      |
| 3         | DCP2         | VF     |      |    |            |                             |                           |                               |      |
| 3         | APCDD1       | VF     |      |    |            |                             |                           |                               |      |
| 3         | BRWD3        | VF     |      |    |            |                             |                           |                               |      |
| 3         | SNX33        | VF     |      |    | X          |                             |                           |                               |      |
| 3         | SVEP1        | VF     | X    |    |            |                             |                           |                               |      |
| 3         | LDHD         | VF     |      |    |            |                             |                           |                               |      |
| 3         | STRC         | VF     |      |    |            |                             |                           |                               |      |
| 3         | SIAE         | VF     |      |    |            |                             |                           |                               |      |
| 3         | C14orf50     | VF     |      |    |            |                             |                           |                               |      |
| 3         | MOBK11A      | VF     |      |    |            |                             |                           |                               |      |
| 3         | DCUN1D3      | VF     |      |    |            |                             |                           |                               |      |
| 3         | VKORC1L1     | VF     |      |    |            |                             |                           |                               |      |
| 3         | KLHDC8B      | VF     |      |    |            |                             |                           |                               |      |
| 3         | EFCAB4A      | VF     |      |    |            |                             |                           |                               |      |
| 3         | C20orf197    | VF     |      |    |            |                             |                           |                               |      |
| 3         | NDUFAF2      | VF     |      |    |            |                             |                           |                               |      |
| 3         | MT1E         | VF     |      |    |            |                             |                           |                               |      |
| 3         | CHSY3        | VF     |      |    |            |                             |                           |                               |      |
| 3         | SIX5         | VF     | X    | X  |            |                             |                           |                               |      |
| 3         | C16orf54     | VF     |      |    |            |                             |                           |                               |      |
| 3         | MT1M         | VF     |      |    |            |                             |                           |                               |      |
| 3         | H2AFJ        | VF     |      |    |            |                             |                           |                               |      |
| 3         | ZNF831       | VF     |      |    |            |                             |                           |                               |      |
| 3         | RTN4RL1      | VF     |      |    |            |                             |                           |                               |      |
| 3         | MRAP         | VF     |      |    |            |                             |                           |                               |      |
| 3         | FBXO27       | VF     |      |    |            |                             |                           |                               |      |
| 3         | GLDN         | VF     |      |    |            |                             |                           |                               |      |
| 3         | DDX26B       | VF     |      |    |            |                             |                           |                               |      |
| 3         | TMEM37       | VF     |      |    |            |                             |                           |                               |      |
| 3         | C6orf145     | VF     |      |    |            |                             |                           |                               |      |
| 3         | ABHD15       | VF     |      |    |            |                             |                           |                               |      |
| 3         | SHISA4       | VF     |      |    |            |                             |                           |                               |      |
| 3         | MIMS22L      | VF     |      |    |            |                             |                           |                               |      |
| 3         | FAM89A       | VF     |      |    |            |                             |                           |                               |      |
| 3         | LRRN4CL      | VF     |      |    |            |                             |                           |                               |      |
| 3         | C19orf70     | VF     |      |    |            |                             |                           |                               |      |
| 3         | GPR153       | VF     |      |    |            |                             |                           |                               |      |
| 3         | C14orf181    | VF     |      |    |            |                             |                           |                               |      |
| 3         | MT1L         | VF     |      |    |            |                             |                           |                               |      |
| 3         | H19          | VF     |      |    |            |                             |                           |                               |      |
| 3         | DLEU2        | VF     |      |    |            |                             |                           |                               |      |
| 3         | AQP7P1       | VF     |      |    |            |                             |                           |                               |      |
| 3         | LOC387647    | VF     |      |    |            |                             |                           |                               |      |
| 3         | LOC644145    | VF     |      |    |            |                             |                           |                               |      |
| 3         | GVINP1       | VF     |      |    |            |                             |                           |                               |      |
| 3         | KIAA0087     | VF     |      |    |            |                             |                           |                               |      |
| 3         | KIAA0664L3   | VF     |      |    |            |                             |                           |                               |      |
| 3         | LOC100170939 | VF     |      |    |            |                             |                           |                               |      |
| 3         | LOC113230    | VF     |      |    |            |                             |                           |                               |      |
| 3         | LOC283663    | VF     |      |    |            |                             |                           |                               |      |
| 3         | LOC100129637 | VF     |      |    |            |                             |                           |                               |      |
| 3         | LOC151534    | VF     |      |    |            |                             |                           |                               |      |
| 3         | LOC400043    | VF     |      |    |            |                             |                           |                               |      |
| 3         | LOC145474    | VF     |      |    |            |                             |                           |                               |      |
| 3         | C21orf82     | VF     |      |    |            |                             |                           |                               |      |
| 3         | LOC283070    | VF     |      |    |            |                             |                           |                               |      |
| 3         | NCRNA00173   | VF     |      |    |            |                             |                           |                               |      |
| 3         | LOC100272216 | VF     |      |    |            |                             |                           |                               |      |
| 3         | C21orf34     | VF     |      |    |            |                             |                           |                               |      |
| 3         | LOC100302640 | VF     |      |    |            |                             |                           |                               |      |
| 3         | C17orf91     | VF     |      |    |            |                             |                           |                               |      |
| 3         | DKFZP4340714 | VF     |      |    |            |                             |                           |                               |      |
| 3         | LOC283335    | VF     |      |    |            |                             |                           |                               |      |
| 3         | LOC729970    | VF     |      |    |            |                             |                           |                               |      |
| 3         | LOC285972    | VF     |      |    |            |                             |                           |                               |      |
| 3         | LOC283481    | VF     |      |    |            |                             |                           |                               |      |
| 3         | LOC400236    | VF     |      |    |            |                             |                           |                               |      |
| Module ID | Gene Symbol  | Tissue | eQTL | TF | Key Driver | Candidate gene in GWAS for: |                           |                               |      |

|    |              |     |   |   | CAD | Plasma glucose metabolism | Plasma cholesterol metabolism | T2DM |
|----|--------------|-----|---|---|-----|---------------------------|-------------------------------|------|
| 12 | GCK          | AAW |   |   |     | X                         |                               |      |
| 12 | NME1         | AAW | X | X |     |                           |                               |      |
| 12 | ICAM2        | AAW |   |   |     |                           |                               |      |
| 12 | GNE          | AAW |   |   |     |                           |                               |      |
| 12 | TLCD2        | AAW |   |   |     |                           |                               |      |
| 12 | BIRC3        | AAW |   |   |     |                           |                               |      |
| 12 | RBM6         | AAW |   |   |     |                           |                               |      |
| 12 | SNCG         | AAW |   |   |     |                           |                               |      |
| 12 | TRIM66       | AAW | X |   |     |                           |                               |      |
| 12 | PDXP         | AAW |   |   |     |                           |                               |      |
| 12 | C6orf57      | AAW |   |   |     |                           |                               |      |
| 12 | ZNF563       | AAW |   |   |     |                           |                               |      |
| 12 | ZNF785       | AAW |   |   |     |                           |                               |      |
| 12 | VKORC1L1     | AAW |   |   |     |                           |                               |      |
| 12 | NLRP9        | AAW |   |   |     |                           |                               |      |
| 12 | LRR37A3      | AAW |   |   |     |                           |                               |      |
| 12 | LOC442454    | AAW |   |   |     |                           |                               |      |
| 12 | MCM3AP-AS1   | AAW |   |   |     |                           |                               |      |
| 12 | LOC100130776 | AAW |   |   |     |                           |                               |      |
| 12 | LOC728640    | AAW |   |   |     |                           |                               |      |
| 12 | LOC100131564 | AAW |   |   |     |                           |                               |      |
| 12 | CCDC144B     | AAW |   |   |     |                           |                               |      |
| 12 | CAPN3        | IMA |   |   |     |                           |                               |      |
| 12 | HSO19B3      | IMA |   |   |     |                           |                               |      |
| 12 | LCAT         | IMA |   |   |     |                           | X                             |      |
| 12 | PHKA2        | IMA |   |   |     |                           |                               |      |
| 12 | AMT          | IMA |   |   |     |                           |                               |      |
| 12 | GNRH1        | IMA | X | X |     |                           |                               |      |
| 12 | KLKB1        | IMA |   |   |     |                           |                               |      |
| 12 | GRK4         | IMA | X |   |     |                           |                               |      |
| 12 | SPDYE3       | IMA |   |   |     |                           |                               |      |
| 12 | LAT          | IMA |   |   |     |                           |                               |      |
| 12 | SUGP2        | IMA |   |   |     |                           |                               |      |
| 12 | MUC1         | IMA |   |   |     |                           |                               |      |
| 12 | LRR366       | IMA |   |   |     |                           |                               |      |
| 12 | PLAC8L1      | IMA |   |   |     |                           |                               |      |
| 12 | MRI1         | IMA |   |   |     |                           |                               |      |
| 12 | C1orf175     | IMA |   |   |     |                           |                               |      |
| 12 | GK5          | IMA | X | X |     |                           |                               |      |
| 12 | CCNL2        | IMA |   |   |     |                           |                               |      |
| 12 | C6orf26      | IMA |   | X |     |                           |                               |      |
| 12 | C4orf29      | IMA |   |   |     |                           |                               |      |
| 12 | MAPK8IP3     | IMA | X | X |     |                           |                               |      |
| 12 | SLC26A6      | IMA |   |   |     |                           |                               |      |
| 12 | C14orf138    | IMA |   |   |     |                           |                               |      |
| 12 | KIAA0895L    | IMA |   |   |     |                           |                               |      |
| 12 | GSDMB        | IMA |   |   |     |                           |                               |      |
| 12 | ENGASE       | IMA |   |   |     |                           |                               |      |
| 12 | TTC14        | IMA | X | X |     |                           |                               |      |
| 12 | DFNB59       | IMA |   |   |     |                           |                               |      |
| 12 | PHACTR4      | IMA |   |   |     |                           |                               |      |
| 12 | NXF1         | IMA |   |   |     |                           |                               |      |
| 12 | ZNF154       | IMA | X |   |     |                           |                               |      |
| 12 | MUC20        | IMA |   |   |     |                           |                               |      |
| 12 | TTC21A       | IMA |   |   |     |                           |                               |      |
| 12 | ZNF276       | IMA |   |   |     |                           |                               |      |
| 12 | LIM1A1       | IMA |   |   |     |                           |                               |      |
| 12 | ARL17A       | IMA |   |   |     |                           |                               |      |
| 12 | PABPC1L      | IMA |   |   |     |                           |                               |      |
| 12 | ENOSF1       | IMA |   |   |     |                           |                               |      |
| 12 | ACCS         | IMA |   |   |     |                           |                               |      |
| 12 | PAN2         | IMA |   |   |     |                           |                               |      |
| 12 | RHD          | IMA |   |   |     |                           |                               |      |
| 12 | CEACAM19     | IMA |   |   |     |                           |                               |      |
| 12 | PLXNB1       | IMA |   |   |     |                           |                               |      |
| 12 | FAM188B      | IMA |   |   |     |                           |                               |      |
| 12 | AGER         | IMA |   |   |     |                           |                               |      |
| 12 | ZNF692       | IMA |   |   |     |                           |                               |      |
| 12 | SVT2         | IMA |   |   |     |                           |                               |      |
| 12 | DMTF1        | IMA | X | X |     |                           |                               |      |
| 12 | PPP1R13L     | IMA | X |   |     |                           |                               |      |
| 12 | SEC61A2      | IMA |   |   |     |                           |                               |      |
| 12 | SLC23A3      | IMA |   |   |     |                           |                               |      |
| 12 | AKR7L        | IMA |   |   |     |                           |                               |      |
| 12 | KIAA1683     | IMA |   |   |     |                           |                               |      |
| 12 | PLXNB3       | IMA |   |   |     |                           |                               |      |
| 12 | ITIH4        | IMA | X |   |     |                           |                               |      |
| 12 | RBM6         | IMA |   |   |     |                           |                               |      |
| 12 | MASTL        | IMA |   |   |     |                           |                               |      |
| 12 | ARHGAP33     | IMA |   |   |     |                           |                               |      |
| 12 | CELF6        | IMA |   |   |     |                           |                               |      |

| 12        | SPEG        | IMA    |      |    |            |                             |                           |                               |      |  |
|-----------|-------------|--------|------|----|------------|-----------------------------|---------------------------|-------------------------------|------|--|
| 12        | SGK494      | IMA    |      |    |            |                             |                           |                               |      |  |
| 12        | CES4A       | IMA    |      |    |            |                             |                           |                               |      |  |
| 12        | ALS2CL      | IMA    |      |    |            |                             |                           |                               |      |  |
| 12        | FAM193B     | IMA    |      |    |            |                             |                           |                               |      |  |
| 12        | MAP3K12     | IMA    |      |    |            |                             |                           |                               |      |  |
| 12        | C17orf57    | IMA    |      |    |            |                             |                           |                               |      |  |
| 12        | ECHDC2      | IMA    |      |    |            |                             |                           |                               |      |  |
| 12        | GABBR1      | IMA    |      |    |            |                             |                           |                               |      |  |
| 12        | CS          | IMA    |      |    |            |                             |                           |                               |      |  |
| 12        | COL16A1     | IMA    |      |    |            |                             |                           |                               |      |  |
| 12        | MPP3        | IMA    |      |    |            |                             |                           |                               |      |  |
| 12        | GNB3        | IMA    |      |    |            |                             |                           |                               |      |  |
| 12        | MYH3        | IMA    |      |    |            |                             |                           |                               |      |  |
| 12        | OVGP1       | IMA    |      |    |            |                             |                           |                               |      |  |
| 12        | SNRNP70     | IMA    |      |    |            |                             |                           |                               |      |  |
| 12        | MLL2        | IMA    |      |    |            |                             |                           |                               |      |  |
| 12        | NPFF        | IMA    |      |    |            |                             |                           |                               |      |  |
| 12        | AP1G2       | IMA    |      |    |            |                             |                           |                               |      |  |
| 12        | SLC25A27    | IMA    | X    |    |            |                             |                           |                               |      |  |
| 12        | PIGL        | IMA    |      |    |            |                             |                           |                               |      |  |
| 12        | CDC25B      | IMA    |      |    |            |                             |                           |                               |      |  |
| 12        | DMWD        | IMA    |      |    |            |                             |                           |                               |      |  |
| 12        | GABRE       | IMA    |      |    |            |                             |                           |                               |      |  |
| 12        | TXN19       | IMA    |      | X  |            |                             |                           |                               |      |  |
| 12        | LAMA5       | IMA    |      |    |            |                             |                           |                               |      |  |
| 12        | MAK         | IMA    |      |    |            |                             |                           |                               |      |  |
| 12        | HDAC6       | IMA    |      | X  | X          |                             |                           |                               |      |  |
| 12        | APBB3       | IMA    |      |    |            |                             |                           |                               |      |  |
| 12        | AVIL        | IMA    |      |    |            |                             |                           |                               |      |  |
| 12        | ZNF266      | IMA    | X    |    |            |                             |                           |                               |      |  |
| 12        | NPIP        | IMA    |      |    |            |                             |                           |                               |      |  |
| 12        | CD160       | IMA    |      |    |            |                             |                           |                               |      |  |
| 12        | ANKRD11     | IMA    |      |    |            |                             |                           |                               |      |  |
| 12        | NR2E3       | IMA    |      | X  |            |                             |                           |                               |      |  |
| 12        | TRIM66      | IMA    |      | X  |            |                             |                           |                               |      |  |
| 12        | TRANK1      | IMA    |      |    |            |                             |                           |                               |      |  |
| 12        | IGSF9B      | IMA    |      |    |            |                             |                           |                               |      |  |
| 12        | KIAA0754    | IMA    |      |    |            |                             |                           |                               |      |  |
| 12        | SETD1B      | IMA    |      |    |            |                             |                           |                               |      |  |
| 12        | ZNF10       | IMA    |      |    |            |                             |                           |                               |      |  |
| Module ID | Gene Symbol | Tissue | eQTL | TF | Key Driver | Candidate gene in GWAS for: |                           |                               |      |  |
|           |             |        |      |    |            | CAD                         | Plasma glucose metabolism | Plasma cholesterol metabolism | T2DM |  |
| 12        | L3MBTL1     | IMA    |      |    |            |                             |                           |                               |      |  |
| 12        | SEC31B      | IMA    |      | X  | X          |                             |                           |                               |      |  |
| 12        | STK36       | IMA    | X    |    |            |                             |                           |                               |      |  |
| 12        | INTU        | IMA    |      |    |            |                             |                           |                               |      |  |
| 12        | CSAD        | IMA    |      |    |            |                             |                           |                               |      |  |
| 12        | AADAT       | IMA    |      |    |            |                             |                           |                               |      |  |
| 12        | SRRM2       | IMA    |      |    |            |                             |                           |                               |      |  |
| 12        | PLXNA3      | IMA    |      |    |            |                             |                           |                               |      |  |
| 12        | HAUS7       | IMA    |      |    |            |                             |                           |                               |      |  |
| 12        | DONSON      | IMA    |      |    |            |                             |                           |                               |      |  |
| 12        | YEATS2      | IMA    |      |    |            |                             |                           |                               |      |  |
| 12        | CENPJ       | IMA    |      |    |            |                             |                           |                               |      |  |
| 12        | C10orf63    | IMA    |      |    |            |                             |                           |                               |      |  |
| 12        | STAR9D      | IMA    |      |    |            |                             |                           |                               |      |  |
| 12        | MST1        | IMA    |      |    |            |                             |                           |                               |      |  |
| 12        | KAT2A       | IMA    |      | X  | X          |                             |                           |                               |      |  |
| 12        | FOXM1       | IMA    |      | X  |            |                             |                           |                               |      |  |
| 12        | HIF3A       | IMA    |      | X  |            |                             |                           |                               |      |  |
| 12        | GIGYF1      | IMA    |      |    |            |                             |                           |                               |      |  |
| 12        | FAM113A     | IMA    |      |    |            |                             |                           |                               |      |  |
| 12        | GDPD3       | IMA    |      |    |            |                             |                           |                               |      |  |
| 12        | C16orf53    | IMA    |      |    |            |                             |                           |                               |      |  |
| 12        | NEIL1       | IMA    |      |    |            |                             |                           |                               |      |  |
| 12        | NANOG       | IMA    |      | X  | X          |                             |                           |                               |      |  |
| 12        | ATHL1       | IMA    |      |    |            |                             |                           |                               |      |  |
| 12        | NINL        | IMA    |      |    |            |                             |                           |                               |      |  |
| 12        | EGFL8       | IMA    |      |    |            |                             |                           |                               |      |  |
| 12        | ACAD11      | IMA    |      |    |            |                             |                           |                               |      |  |
| 12        | PLCD4       | IMA    |      |    |            |                             |                           | X                             |      |  |
| 12        | TRIM52      | IMA    |      |    |            |                             |                           |                               |      |  |
| 12        | ZNF514      | IMA    |      |    |            |                             |                           |                               |      |  |
| 12        | GNG8        | IMA    |      |    |            |                             |                           |                               |      |  |
| 12        | ATG16L2     | IMA    |      |    |            |                             |                           |                               |      |  |
| 12        | MBD6        | IMA    |      |    |            |                             |                           |                               |      |  |
| 12        | LENG8       | IMA    |      |    |            |                             |                           |                               |      |  |
| 12        | ACRC        | IMA    |      |    |            |                             |                           |                               |      |  |
| 12        | CATSPER2    | IMA    |      |    |            |                             |                           |                               |      |  |
| 12        | SLC26A10    | IMA    |      |    |            |                             |                           |                               |      |  |
| 12        | RAD52       | IMA    |      |    |            |                             |                           |                               |      |  |

| 12        | CCDC45       | IMA    |      |    |            |                             |                           |                               |      |
|-----------|--------------|--------|------|----|------------|-----------------------------|---------------------------|-------------------------------|------|
| 12        | ADHFE1       | IMA    |      |    |            |                             |                           |                               |      |
| 12        | UBQLNL       | IMA    |      |    |            |                             |                           |                               |      |
| 12        | TTC18        | IMA    |      |    |            |                             |                           |                               |      |
| 12        | PRRT2        | IMA    |      |    |            |                             |                           |                               |      |
| 12        | ZNF563       | IMA    |      |    |            |                             |                           |                               |      |
| 12        | WDR90        | IMA    |      |    |            |                             |                           |                               |      |
| 12        | KIFC2        | IMA    |      |    |            |                             |                           |                               |      |
| 12        | AHSA2        | IMA    |      |    |            |                             |                           |                               |      |
| 12        | C19orf18     | IMA    |      |    |            |                             |                           |                               |      |
| 12        | D2HGDH       | IMA    |      |    |            |                             |                           |                               |      |
| 12        | PLEKHH2      | IMA    |      |    |            |                             |                           |                               |      |
| 12        | LYG1         | IMA    |      |    |            |                             |                           |                               |      |
| 12        | SPDY1        | IMA    |      |    |            |                             |                           |                               |      |
| 12        | CRIPAK       | IMA    |      |    |            |                             |                           |                               |      |
| 12        | NLRP9        | IMA    |      |    |            |                             |                           |                               |      |
| 12        | PILRB        | IMA    |      |    |            |                             |                           |                               |      |
| 12        | NRBP2        | IMA    |      |    |            |                             |                           |                               |      |
| 12        | GOLGA8A      | IMA    |      |    |            |                             |                           |                               |      |
| 12        | DDX26B       | IMA    |      |    |            |                             |                           |                               |      |
| 12        | PDDC1        | IMA    |      |    |            |                             |                           |                               |      |
| 12        | CCDC84       | IMA    |      |    |            |                             |                           |                               |      |
| 12        | LRRK37A3     | IMA    |      |    |            |                             |                           |                               |      |
| 12        | RNF207       | IMA    |      |    |            |                             |                           |                               |      |
| 12        | SMHG10       | IMA    |      |    |            |                             |                           |                               |      |
| 12        | SNORA66      | IMA    |      |    |            |                             |                           |                               |      |
| 12        | SNORA72      | IMA    |      |    |            |                             |                           |                               |      |
| 12        | SLC7A5P2     | IMA    |      |    |            |                             |                           |                               |      |
| 12        | SNORD87      | IMA    |      |    |            |                             |                           |                               |      |
| 12        | KCNQ1OT1     | IMA    |      |    |            |                             |                           |                               |      |
| 12        | SNORD56      | IMA    |      |    |            |                             |                           |                               |      |
| 12        | LOC338799    | IMA    |      |    |            |                             |                           |                               |      |
| 12        | LOC285359    | IMA    |      |    |            |                             |                           |                               |      |
| 12        | SNORA77      | IMA    | X    |    |            |                             |                           |                               |      |
| 12        | SNORD11      | IMA    |      |    |            |                             |                           |                               |      |
| 12        | SNORD7       | IMA    |      |    |            |                             |                           |                               |      |
| 12        | AFG3L1P      | IMA    |      |    |            |                             |                           |                               |      |
| 12        | SDHAP2       | IMA    |      |    |            |                             |                           |                               |      |
| 12        | EP400NL      | IMA    |      |    |            |                             |                           |                               |      |
| 12        | MYO15B       | IMA    |      |    |            |                             |                           |                               |      |
| 12        | PDXDC2P      | IMA    |      |    |            |                             |                           |                               |      |
| 12        | POLR2J4      | IMA    |      |    |            |                             |                           |                               |      |
| 12        | UBE2Q2P1     | IMA    |      |    |            |                             |                           |                               |      |
| 12        | LOC254312    | IMA    |      |    |            |                             |                           |                               |      |
| 12        | LOC652276    | IMA    |      |    |            |                             |                           |                               |      |
| 12        | ZNF137P      | IMA    |      |    |            |                             |                           |                               |      |
| 12        | CROCCP3      | IMA    |      |    |            |                             |                           |                               |      |
| 12        | PRINS        | IMA    |      |    |            |                             |                           |                               |      |
| 12        | GOLGA2B      | IMA    |      |    |            |                             |                           |                               |      |
| 12        | NCRNA00241   | IMA    |      |    |            |                             |                           |                               |      |
| 12        | NCRNA00085   | IMA    |      |    |            |                             |                           |                               |      |
| 12        | LOC283174    | IMA    |      |    |            |                             |                           |                               |      |
| 12        | LOC728190    | IMA    |      |    |            |                             |                           |                               |      |
| 12        | LOC91316     | IMA    |      |    |            |                             |                           |                               |      |
| 12        | LOC100129637 | IMA    |      |    |            |                             |                           |                               |      |
| 12        | CROCCP2      | IMA    | X    |    |            |                             |                           |                               |      |
| 12        | NCRNA00201   | IMA    |      |    |            |                             |                           |                               |      |
| 12        | HCG27        | IMA    |      |    |            |                             |                           |                               |      |
| 12        | FLI13197     | IMA    |      |    |            |                             |                           |                               |      |
| Module ID | Gene Symbol  | Tissue | eQTL | TF | Key Driver | Candidate gene in GWAS for: |                           |                               |      |
|           |              |        |      |    |            | CAD                         | Plasma glucose metabolism | Plasma cholesterol metabolism | T2DM |
| 12        | C15orf28     | IMA    |      |    |            |                             |                           |                               |      |
| 12        | MTMR9LP      | IMA    |      |    |            |                             |                           |                               |      |
| 12        | CG030        | IMA    |      |    |            |                             |                           |                               |      |
| 12        | C6orf147     | IMA    |      |    |            |                             |                           |                               |      |
| 12        | LOC728264    | IMA    |      |    |            |                             |                           |                               |      |
| 12        | NCRNA00107   | IMA    |      |    |            |                             |                           |                               |      |
| 12        | GU5BP3       | IMA    |      |    |            |                             |                           |                               |      |
| 12        | LOC100272216 | IMA    |      |    |            |                             |                           |                               |      |
| 12        | LOC100131434 | IMA    |      |    |            |                             |                           |                               |      |
| 12        | LOC100272228 | IMA    |      |    |            |                             |                           |                               |      |
| 12        | FLI14107     | IMA    |      |    |            |                             |                           |                               |      |
| 12        | ZNF767       | IMA    |      |    |            |                             |                           |                               |      |
| 12        | ARMCX4       | IMA    |      |    |            |                             |                           |                               |      |
| 12        | NSUN5P1      | IMA    |      |    |            |                             |                           |                               |      |
| 12        | CCT6P3       | IMA    |      |    |            |                             |                           |                               |      |
| 12        | LOC100131564 | IMA    |      |    |            |                             |                           |                               |      |
| 12        | LOC100128398 | IMA    |      |    |            |                             |                           |                               |      |
| 12        | LOC100289230 | IMA    |      |    |            |                             |                           |                               |      |
| 12        | DPY19L1P1    | IMA    | X    |    |            |                             |                           |                               |      |
| 12        | LOC100527964 | IMA    |      |    |            |                             |                           |                               |      |
| 12        | C4orf29      | SM     |      |    |            |                             |                           |                               |      |

| 12        | C19orf18    | SM     |      |    |            |                             |                           |                               |      |  |
|-----------|-------------|--------|------|----|------------|-----------------------------|---------------------------|-------------------------------|------|--|
| 12        | CCDC84      | SM     |      |    |            |                             |                           |                               |      |  |
| 12        | SNORD72     | SM     |      |    |            |                             |                           |                               |      |  |
| 12        | SNORD56     | SM     |      |    |            |                             |                           |                               |      |  |
| 12        | GUSBP3      | SM     |      |    |            |                             |                           |                               |      |  |
| Module ID | Gene Symbol | Tissue | eQTL | TF | Key Driver | Candidate gene in GWAS for: |                           |                               |      |  |
|           |             |        |      |    |            | CAD                         | Plasma glucose metabolism | Plasma cholesterol metabolism | T2DM |  |
| 13        | ENG         | AAW    |      |    |            |                             |                           |                               |      |  |
| 13        | LAMA2       | AAW    |      |    |            |                             |                           |                               |      |  |
| 13        | ADRA2B      | AAW    | X    |    |            |                             |                           |                               |      |  |
| 13        | FMO3        | AAW    |      |    |            |                             |                           |                               |      |  |
| 13        | Cyorf15A    | AAW    |      |    |            |                             |                           |                               |      |  |
| 13        | RP54Y1      | AAW    |      |    | X          |                             |                           |                               |      |  |
| 13        | GCOM1       | AAW    | X    |    |            |                             |                           |                               |      |  |
| 13        | SMOC1       | AAW    |      |    |            |                             |                           |                               |      |  |
| 13        | MYH14       | AAW    |      |    |            |                             |                           |                               |      |  |
| 13        | NRXN3       | AAW    |      |    |            |                             |                           |                               |      |  |
| 13        | CCNA1       | AAW    |      |    |            |                             |                           |                               |      |  |
| 13        | DDX3Y       | AAW    |      |    |            |                             |                           |                               |      |  |
| 13        | TRPC4       | AAW    |      |    |            |                             |                           |                               |      |  |
| 13        | ZFY         | AAW    |      | X  | X          |                             |                           |                               |      |  |
| 13        | KDM5D       | AAW    |      |    |            |                             |                           |                               |      |  |
| 13        | NLGN4Y      | AAW    |      |    |            |                             |                           |                               |      |  |
| 13        | SCN1A       | AAW    |      |    |            |                             |                           |                               |      |  |
| 13        | CARN51      | AAW    |      |    |            |                             |                           |                               |      |  |
| 13        | LOC402778   | AAW    |      |    |            |                             |                           |                               |      |  |
| 13        | SEMA3E      | AAW    |      |    |            |                             |                           |                               |      |  |
| 13        | B4GALNT1    | AAW    |      |    |            |                             |                           |                               |      |  |
| 13        | LCN1        | AAW    |      |    |            |                             |                           |                               |      |  |
| 13        | WISP2       | AAW    | X    |    |            |                             |                           |                               |      |  |
| 13        | TMSB4Y      | AAW    |      |    |            |                             |                           |                               |      |  |
| 13        | CARTPT      | AAW    |      |    |            |                             |                           |                               |      |  |
| 13        | USP9Y       | AAW    |      |    |            |                             |                           |                               |      |  |
| 13        | EIF1AY      | AAW    |      |    |            |                             |                           |                               |      |  |
| 13        | GDF10       | AAW    |      |    |            |                             |                           |                               |      |  |
| 13        | LG11        | AAW    |      |    |            |                             |                           |                               |      |  |
| 13        | MMP16       | AAW    |      |    |            |                             |                           |                               |      |  |
| 13        | UTY         | AAW    |      |    |            |                             |                           |                               |      |  |
| 13        | KCNE1L      | AAW    |      |    |            |                             |                           |                               |      |  |
| 13        | CAPN6       | AAW    |      |    |            |                             |                           |                               |      |  |
| 13        | CPAMD8      | AAW    |      |    |            |                             |                           |                               |      |  |
| 13        | SLC35F2     | AAW    | X    |    |            |                             |                           |                               |      |  |
| 13        | LG12        | AAW    |      |    |            |                             |                           |                               |      |  |
| 13        | DDX43       | AAW    |      |    |            |                             |                           |                               |      |  |
| 13        | ESY13       | AAW    |      |    |            |                             |                           |                               |      |  |
| 13        | Cyorf15B    | AAW    |      |    |            |                             |                           |                               |      |  |
| 13        | SLITRK1     | AAW    | X    |    |            |                             |                           |                               |      |  |
| 13        | GALNT13     | AAW    |      |    |            |                             |                           |                               |      |  |
| 13        | TBX15       | AAW    |      | X  |            |                             |                           |                               |      |  |
| 13        | APCDD1      | AAW    |      |    |            |                             |                           |                               |      |  |
| 13        | SLC35F3     | AAW    |      |    |            |                             |                           |                               |      |  |
| 13        | DCAF12L1    | AAW    |      |    |            |                             |                           |                               |      |  |
| 13        | RSPO2       | AAW    |      |    |            |                             |                           |                               |      |  |
| 13        | TTY10       | AAW    |      |    |            |                             |                           |                               |      |  |
| 13        | NCRNA00185  | AAW    |      |    |            |                             |                           |                               |      |  |
| 13        | TTY15       | AAW    |      |    |            |                             |                           |                               |      |  |
| 13        | XIST        | AAW    |      |    |            |                             |                           |                               |      |  |
| 13        | C6orf123    | AAW    |      |    |            |                             |                           |                               |      |  |
| 13        | PRKY        | AAW    |      |    |            |                             |                           |                               |      |  |
| 13        | GRIA2       | IMA    | X    |    |            |                             |                           |                               |      |  |
| 13        | Cyorf15A    | IMA    |      |    |            |                             |                           |                               |      |  |
| 13        | RP54Y1      | IMA    |      |    |            |                             |                           |                               |      |  |
| 13        | SMOC1       | IMA    |      |    |            |                             |                           |                               |      |  |
| 13        | PPP1R1C     | IMA    |      |    |            |                             |                           |                               |      |  |
| 13        | MYO3B       | IMA    |      |    |            |                             |                           |                               |      |  |
| 13        | DDX3Y       | IMA    |      |    |            |                             |                           |                               |      |  |
| 13        | ZFY         | IMA    |      | X  | X          |                             |                           |                               |      |  |
| 13        | KDM5D       | IMA    |      |    |            |                             |                           |                               |      |  |
| 13        | DSC3        | IMA    | X    |    | X          |                             |                           |                               |      |  |
| 13        | TMSB4Y      | IMA    |      |    |            |                             |                           |                               |      |  |
| 13        | USP9Y       | IMA    |      |    |            |                             |                           |                               |      |  |
| 13        | EIF1AY      | IMA    |      |    |            |                             |                           |                               |      |  |
| 13        | UTY         | IMA    |      |    |            |                             |                           |                               |      |  |
| 13        | TRHDE       | IMA    | X    |    |            |                             |                           |                               |      |  |
| 13        | LG12        | IMA    |      |    |            |                             |                           |                               |      |  |
| 13        | HHIP        | IMA    |      |    |            |                             |                           |                               |      |  |
| 13        | Cyorf15B    | IMA    |      |    |            |                             |                           |                               |      |  |
| Module ID | Gene Symbol | Tissue | eQTL | TF | Key Driver | Candidate gene in GWAS for: |                           |                               |      |  |
|           |             |        |      |    |            | CAD                         | Plasma glucose metabolism | Plasma cholesterol metabolism | T2DM |  |
| 13        | GALNT13     | IMA    |      |    |            |                             |                           |                               |      |  |
| 13        | TTY10       | IMA    |      |    |            |                             |                           |                               |      |  |
| 13        | NCRNA00185  | IMA    |      |    |            |                             |                           |                               |      |  |





|               |       |   |   |
|---------------|-------|---|---|
| 13 RPS4Y1     | Blood |   |   |
| 13 DSP        | Blood | X | X |
| 13 LGR6       | Blood |   |   |
| 13 RPS4Y2     | Blood |   |   |
| 13 DACT1      | Blood |   |   |
| 13 SCN3A      | Blood |   |   |
| 13 LIPN       | Blood | X |   |
| 13 DDX3Y      | Blood |   |   |
| 13 ZFY        | Blood | X | X |
| 13 KDM5D      | Blood |   |   |
| 13 CORO2B     | Blood |   |   |
| 13 CCBP2      | Blood |   |   |
| 13 EREG       | Blood |   |   |
| 13 NT5E       | Blood |   |   |
| 13 TMSB4Y     | Blood |   |   |
| 13 USP9Y      | Blood |   |   |
| 13 EIF1AY     | Blood |   |   |
| 13 UTY        | Blood |   |   |
| 13 GAL3ST4    | Blood |   |   |
| 13 CYorf15B   | Blood |   |   |
| 13 PAQR9      | Blood |   |   |
| 13 TTTY10     | Blood |   |   |
| 13 NCRNA00185 | Blood |   |   |
| 13 TTTY15     | Blood |   |   |
| 13 XIST       | Blood |   |   |
| 13 FRG1B      | Blood | X |   |
| 13 LOC728190  | Blood | X |   |
| 13 PRKY       | Blood |   |   |
| 13 LOC440900  | Blood | X | X |
| 13 HK2        | SM    |   |   |
| 13 CYorf15A   | SM    |   |   |
| 13 RPS4Y1     | SM    |   |   |
| 13 ADCYAP1    | SM    |   |   |
| 13 DDX3Y      | SM    |   |   |
| 13 LRRC69     | SM    | X |   |
| 13 TMEM229A   | SM    |   |   |
| 13 ZFY        | SM    | X | X |
| 13 GEMC1      | SM    |   |   |
| 13 KDM5D      | SM    |   |   |
| 13 SLITRK4    | SM    |   |   |

|          |    |   |   |
|----------|----|---|---|
| 13 IL18  | SM |   |   |
| 13 HOXA4 | SM | X |   |
| 13 MSX1  | SM | X | X |

All\_modules

| 13        | TMSB4Y       | SM     |      |    |            |                             |                           |                               |      |
|-----------|--------------|--------|------|----|------------|-----------------------------|---------------------------|-------------------------------|------|
| 13        | USP9Y        | SM     |      |    |            |                             |                           |                               |      |
| 13        | EIF1AY       | SM     |      |    |            |                             |                           |                               |      |
| 13        | FGFBP1       | SM     |      |    |            |                             |                           |                               |      |
| 13        | UTY          | SM     |      |    |            |                             |                           |                               |      |
| 13        | PITRM1       | SM     |      |    |            |                             |                           |                               |      |
| 13        | KIAA1024     | SM     |      |    |            |                             |                           |                               |      |
| 13        | TMEM158      | SM     |      |    |            |                             |                           |                               |      |
| 13        | PPP1R1B      | SM     |      |    |            |                             |                           |                               |      |
| 13        | LOXL4        | SM     |      |    |            |                             |                           |                               |      |
| 13        | Cyorf158     | SM     |      |    |            |                             |                           |                               |      |
| 13        | SLFN5        | SM     |      |    |            |                             |                           |                               |      |
| 13        | SPESP1       | SM     |      |    |            |                             |                           |                               |      |
| Module ID | Gene Symbol  | Tissue | eQTL | TF | Key Driver | Candidate gene in GWAS for: |                           |                               |      |
|           |              |        |      |    |            | CAD                         | Plasma glucose metabolism | Plasma cholesterol metabolism | T2DM |
| 13        | LAYN         | SM     |      |    |            |                             |                           |                               |      |
| 13        | TTY10        | SM     |      |    |            |                             |                           |                               |      |
| 13        | NCRNA00185   | SM     |      |    |            |                             |                           |                               |      |
| 13        | TTY15        | SM     |      |    |            |                             |                           |                               |      |
| 13        | XIST         | SM     |      |    |            |                             |                           |                               |      |
| 13        | LOC100128288 | SM     |      |    |            |                             |                           |                               |      |
| 13        | CCDC144B     | SM     |      |    |            |                             |                           |                               |      |
| 13        | ADORA2B      | SF     | X    |    |            |                             |                           |                               |      |
| 13        | TTYH1        | SF     |      |    |            |                             |                           |                               |      |
| 13        | Cyorf15A     | SF     |      |    |            |                             |                           |                               |      |
| 13        | RPS4Y1       | SF     |      |    |            |                             |                           |                               |      |
| 13        | CSN1S1       | SF     |      |    |            |                             |                           |                               |      |
| 13        | TTC39A       | SF     |      |    |            |                             |                           |                               |      |
| 13        | RBM44        | SF     |      |    |            |                             |                           |                               |      |
| 13        | TMEM150C     | SF     |      |    |            |                             |                           |                               |      |
| 13        | C1orf226     | SF     |      |    |            |                             |                           |                               |      |
| 13        | DDX3Y        | SF     |      |    |            |                             |                           |                               |      |
| 13        | ZFY          | SF     |      | X  | X          |                             |                           |                               |      |
| 13        | KDM5D        | SF     |      |    |            |                             |                           |                               |      |
| 13        | FAT2         | SF     |      |    |            |                             |                           |                               |      |
| 13        | COL8A1       | SF     |      |    |            |                             |                           |                               |      |
| 13        | TMSB4Y       | SF     |      |    |            |                             |                           |                               |      |
| 13        | USP9Y        | SF     |      |    |            |                             |                           |                               |      |
| 13        | EIF1AY       | SF     |      |    |            |                             |                           |                               |      |
| 13        | B4GALT6      | SF     |      |    |            |                             |                           |                               |      |
| 13        | ENPP3        | SF     |      |    |            |                             |                           |                               |      |
| 13        | CYP46A1      | SF     |      |    |            |                             |                           |                               |      |
| 13        | UTY          | SF     |      |    |            |                             |                           |                               |      |
| 13        | LILRA4       | SF     |      |    |            |                             |                           |                               |      |
| 13        | FAM90A1      | SF     |      |    |            |                             |                           |                               |      |
| 13        | HRASL5       | SF     |      |    |            |                             |                           |                               |      |
| 13        | ACE2         | SF     |      |    |            |                             |                           |                               |      |
| 13        | Cyorf158     | SF     |      |    |            |                             |                           |                               |      |
| 13        | TBL1Y        | SF     |      |    |            |                             |                           |                               |      |
| 13        | TMEM182      | SF     |      |    |            |                             |                           |                               |      |
| 13        | SPESP1       | SF     |      |    |            |                             |                           |                               |      |
| 13        | FL37543      | SF     |      |    |            |                             |                           |                               |      |
| 13        | TTY10        | SF     |      |    |            |                             |                           |                               |      |
| 13        | NCRNA00185   | SF     |      |    |            |                             |                           |                               |      |
| 13        | TTY15        | SF     |      |    |            |                             |                           |                               |      |
| 13        | XIST         | SF     |      |    |            |                             |                           |                               |      |
| 13        | PRKY         | SF     |      |    |            |                             |                           |                               |      |
| 13        | GYG2P1       | SF     |      |    |            |                             |                           |                               |      |
| 13        | ADORA2B      | VF     | X    |    | X          |                             |                           |                               |      |
| 13        | Cyorf15A     | VF     |      |    |            |                             |                           |                               |      |
| 13        | RPS4Y1       | VF     |      |    |            |                             |                           |                               |      |
| 13        | DDX3Y        | VF     |      |    |            |                             |                           |                               |      |
| 13        | ZFY          | VF     |      | X  | X          |                             |                           |                               |      |
| 13        | KDM5D        | VF     |      |    |            |                             |                           |                               |      |
| 13        | NLGN4Y       | VF     |      |    |            |                             |                           |                               |      |
| 13        | TAC3         | VF     |      |    |            |                             |                           |                               |      |
| 13        | TMSB4Y       | VF     |      |    |            |                             |                           |                               |      |
| 13        | USP9Y        | VF     |      |    |            |                             |                           |                               |      |
| 13        | EIF1AY       | VF     |      |    |            |                             |                           |                               |      |
| 13        | FGFBP1       | VF     |      |    |            |                             |                           |                               |      |
| 13        | SULT1C4      | VF     |      |    |            |                             |                           |                               |      |
| 13        | UTY          | VF     |      |    |            |                             |                           |                               |      |
| 13        | Cyorf158     | VF     |      |    |            |                             |                           |                               |      |
| 13        | C12orf64     | VF     |      |    |            |                             |                           |                               |      |
| 13        | TTY10        | VF     |      |    |            |                             |                           |                               |      |
| 13        | NCRNA00185   | VF     |      |    |            |                             |                           |                               |      |
| 13        | TTY15        | VF     |      |    |            |                             |                           |                               |      |
| 13        | XIST         | VF     |      |    |            |                             |                           |                               |      |
| 13        | SNORA66      | VF     |      |    |            |                             |                           |                               |      |
| 13        | HERC2P4      | VF     |      |    |            |                             |                           |                               |      |
| 13        | PRKY         | VF     |      |    |            |                             |                           |                               |      |
| Module ID | Gene Symbol  | Tissue | eQTL | TF | Key Driver | Candidate gene in GWAS for: |                           |                               |      |

|    |              |     |   |   |   | CAD | Plasma glucose metabolism | Plasma cholesterol metabolism | T2DM |
|----|--------------|-----|---|---|---|-----|---------------------------|-------------------------------|------|
| 16 | KRT17        | AAW |   |   |   |     |                           |                               |      |
| 16 | SH3BGR       | AAW |   |   |   |     |                           |                               |      |
| 16 | TRIM34       | AAW |   |   |   |     |                           |                               |      |
| 16 | IGF2BP2      | AAW |   |   |   |     |                           |                               | X    |
| 16 | PTPLAD2      | AAW |   |   |   |     |                           |                               |      |
| 16 | CENPW        | AAW |   |   |   |     |                           |                               |      |
| 16 | C5orf56      | AAW |   |   |   |     |                           |                               |      |
| 16 | MUC1         | AAW |   |   |   |     |                           |                               |      |
| 16 | C1orf53      | AAW | X |   |   |     |                           |                               |      |
| 16 | MYH11        | AAW |   |   |   |     |                           |                               |      |
| 16 | GSDMB        | AAW |   |   |   |     |                           |                               |      |
| 16 | GIC1         | AAW |   |   |   |     |                           |                               |      |
| 16 | MIRGPRF      | AAW |   |   |   |     |                           |                               |      |
| 16 | RAPGEF4      | AAW |   |   |   |     |                           |                               |      |
| 16 | LOC728819    | AAW |   |   |   |     |                           |                               |      |
| 16 | NTF3         | AAW |   |   |   |     |                           |                               |      |
| 16 | NCOA7        | AAW |   |   |   |     |                           |                               |      |
| 16 | POSTN        | AAW |   |   |   |     |                           |                               |      |
| 16 | SYT2         | AAW |   |   |   |     |                           |                               |      |
| 16 | CHAC1        | AAW |   |   |   |     |                           |                               |      |
| 16 | SCG5         | AAW |   |   |   |     |                           |                               |      |
| 16 | ZNF814       | AAW |   |   |   |     |                           |                               |      |
| 16 | AKR7L        | AAW |   |   |   |     |                           |                               |      |
| 16 | ANK3         | AAW |   |   |   |     |                           |                               |      |
| 16 | TLCD1        | AAW |   |   |   |     |                           |                               |      |
| 16 | PLXNB3       | AAW |   |   |   |     |                           |                               |      |
| 16 | GOLGA6C      | AAW |   |   |   |     |                           |                               |      |
| 16 | BEX2         | AAW |   |   |   |     |                           |                               |      |
| 16 | WDR66        | AAW |   |   |   |     |                           |                               |      |
| 16 | GNB3         | AAW |   |   |   |     |                           |                               |      |
| 16 | MXD1         | AAW |   | X | X |     |                           |                               |      |
| 16 | NDUFB3       | AAW |   |   |   |     |                           |                               |      |
| 16 | SLC6A1       | AAW | X |   |   |     |                           |                               |      |
| 16 | SPAG4        | AAW |   |   |   |     |                           |                               |      |
| 16 | PPIFA2       | AAW |   | X |   |     |                           |                               |      |
| 16 | FOX51        | AAW |   |   |   |     |                           |                               |      |
| 16 | ISG15        | AAW |   |   |   |     |                           |                               |      |
| 16 | PDLIM7       | AAW |   |   |   |     |                           |                               |      |
| 16 | TSPAN1       | AAW |   |   |   |     |                           |                               |      |
| 16 | PROCR        | AAW | X |   | X |     |                           |                               |      |
| 16 | PHGDH        | AAW |   |   |   |     |                           |                               |      |
| 16 | GMPR         | AAW |   |   |   |     |                           |                               |      |
| 16 | SCRG1        | AAW |   |   |   |     |                           |                               |      |
| 16 | LRRTM2       | AAW |   |   |   |     |                           |                               |      |
| 16 | RNF125       | AAW |   |   |   |     |                           |                               |      |
| 16 | ZNF34        | AAW | X |   |   |     |                           |                               |      |
| 16 | LRP2BP       | AAW |   |   |   |     |                           |                               |      |
| 16 | TMSB15A      | AAW |   |   |   |     |                           |                               |      |
| 16 | KCNK15       | AAW |   |   |   |     |                           |                               |      |
| 16 | HIF3A        | AAW | X | X | X |     |                           |                               |      |
| 16 | ATOH8        | AAW |   |   | X |     |                           |                               |      |
| 16 | CATSPER2     | AAW |   |   |   |     |                           |                               |      |
| 16 | CITED4       | AAW |   | X | X |     |                           |                               |      |
| 16 | ESAM         | AAW |   |   |   |     |                           |                               |      |
| 16 | CHMP4C       | AAW |   |   |   |     |                           |                               |      |
| 16 | AHS42        | AAW | X |   | X |     |                           |                               |      |
| 16 | C9orf93      | AAW |   |   |   |     |                           |                               |      |
| 16 | TMSB158      | AAW |   |   |   |     |                           |                               |      |
| 16 | GALNTL4      | AAW |   |   |   |     |                           |                               |      |
| 16 | C5orf46      | AAW |   |   |   |     |                           |                               |      |
| 16 | SNORD21      | AAW |   |   |   |     |                           |                               |      |
| 16 | LOC285359    | AAW |   |   |   |     |                           |                               |      |
| 16 | SUGT1P3      | AAW |   |   |   |     |                           |                               |      |
| 16 | FL13197      | AAW |   |   |   |     |                           |                               |      |
| 16 | C15orf28     | AAW |   |   |   |     |                           |                               |      |
| 16 | LOC728264    | AAW |   |   |   |     |                           |                               |      |
| 16 | LOC100132832 | AAW | X |   |   |     |                           |                               |      |
| 16 | LOC100302640 | AAW |   |   |   |     |                           |                               |      |
| 16 | RP1-177G6.2  | AAW |   |   |   |     |                           |                               |      |
| 16 | LOC401321    | AAW |   |   |   |     |                           |                               |      |
| 16 | TCN2         | IMA |   |   |   |     |                           |                               |      |
| 16 | ODF2L        | IMA |   |   |   |     |                           |                               |      |
| 16 | DDX60L       | IMA |   |   |   |     |                           |                               |      |
| 16 | SAMD5        | IMA |   |   |   |     |                           |                               |      |
| 16 | CCDC112      | IMA |   |   |   |     |                           |                               |      |
| 16 | SLC7A9       | IMA |   |   |   |     |                           |                               |      |
| 16 | C7orf46      | IMA |   |   |   |     |                           |                               |      |
| 16 | WDR67        | IMA |   |   |   |     |                           |                               |      |
| 16 | ETV3         | IMA | X |   | X |     |                           |                               |      |
| 16 | LOC147670    | IMA |   |   |   |     |                           |                               |      |
| 16 | SEMA6D       | IMA |   |   |   |     |                           |                               |      |

| 16        | SGK2        | IMA    |      |    |            |                             |                           |                               |      |
|-----------|-------------|--------|------|----|------------|-----------------------------|---------------------------|-------------------------------|------|
| 16        | ECH1        | IMA    |      |    |            |                             |                           |                               |      |
| 16        | NDUFB3      | IMA    |      |    |            |                             |                           |                               |      |
| 16        | SLC6A1      | IMA    | X    |    | X          |                             |                           |                               |      |
| 16        | ZNF267      | IMA    |      |    |            |                             |                           |                               |      |
| 16        | SOAT2       | IMA    |      |    |            |                             |                           |                               |      |
| 16        | RGS11       | IMA    |      |    |            |                             |                           |                               |      |
| 16        | ENDOG       | IMA    |      |    |            |                             |                           |                               |      |
| 16        | ALDOC       | IMA    |      |    |            |                             |                           |                               |      |
| 16        | HIST1H1C    | IMA    |      |    |            |                             |                           |                               |      |
| 16        | CDK2AP2     | IMA    |      |    |            |                             |                           |                               |      |
| 16        | SEPX1       | IMA    |      |    |            |                             |                           |                               |      |
| 16        | PRPF39      | IMA    |      |    |            |                             |                           |                               |      |
| 16        | LRP2BP      | IMA    |      |    |            |                             |                           |                               |      |
| 16        | THAP9       | IMA    |      |    |            |                             |                           |                               |      |
| 16        | LRRC3       | IMA    |      |    |            |                             |                           |                               |      |
| 16        | PYROXD2     | IMA    | X    |    |            |                             |                           |                               |      |
| 16        | C21orf70    | IMA    |      |    |            |                             |                           |                               |      |
| 16        | PEBP4       | IMA    |      |    |            |                             |                           |                               |      |
| 16        | SAMD9L      | IMA    |      |    |            |                             |                           |                               |      |
| 16        | WDR17       | IMA    |      |    |            |                             |                           |                               |      |
| 16        | DPY19L2     | IMA    | X    |    |            |                             |                           |                               |      |
| 16        | CYP4Z1      | IMA    |      |    |            |                             |                           |                               | X    |
| 16        | RBM43       | IMA    |      |    |            |                             |                           |                               |      |
| 16        | HCG3P7      | IMA    |      |    |            |                             |                           |                               |      |
| 16        | TOP1P1      | IMA    |      |    |            |                             |                           |                               |      |
| 16        | MBL1P       | IMA    |      |    |            |                             |                           |                               |      |
| 16        | ZNF300P1    | IMA    | X    |    |            |                             |                           |                               |      |
| 16        | C7orf54     | IMA    |      |    |            |                             |                           |                               |      |
| 16        | SMA5        | IMA    |      |    |            |                             |                           |                               |      |
| 16        | LOC401321   | IMA    |      |    |            |                             |                           |                               |      |
| 16        | ZNF763      | Liver  |      |    |            |                             |                           |                               |      |
| 16        | BIRC3       | Liver  |      |    |            |                             |                           |                               |      |
| 16        | OX3CL1      | Liver  | X    |    |            |                             |                           |                               |      |
| 16        | FAM83D      | Liver  |      |    |            |                             |                           |                               |      |
| 16        | ZNF528      | Liver  | X    |    |            |                             |                           |                               |      |
| 16        | ZG16B       | Liver  | X    |    |            |                             |                           |                               |      |
| 16        | KCNT2       | Liver  |      |    |            |                             |                           |                               |      |
| 16        | LOC440925   | Liver  |      |    |            |                             |                           |                               |      |
| 16        | LOC400680   | Blood  |      |    |            |                             |                           |                               |      |
| 16        | GSDMB       | SM     |      |    |            |                             |                           |                               |      |
| 16        | GEN1        | SM     |      |    |            |                             |                           |                               |      |
| 16        | LDHAL6A     | SM     |      |    |            |                             |                           |                               |      |
| 16        | CES3        | SM     |      |    |            |                             |                           |                               |      |
| 16        | GABBR1      | SM     |      |    | X          |                             |                           |                               |      |
| 16        | DACH1       | SM     |      |    |            |                             |                           |                               |      |
| 16        | NAIP        | SM     |      |    |            |                             |                           |                               |      |
| 16        | ACCN3       | SM     |      |    |            |                             |                           |                               |      |
| 16        | SLIT2       | SM     |      |    |            |                             |                           |                               |      |
| Module ID | Gene Symbol | Tissue | eQTL | TF | Key Driver | Candidate gene in GWAS for: |                           |                               |      |
|           |             |        |      |    |            | CAD                         | Plasma glucose metabolism | Plasma cholesterol metabolism | T2DM |
| 16        | PLL         | SM     |      |    |            |                             |                           |                               |      |
| 16        | C2orf34     | SM     |      |    |            |                             |                           |                               |      |
| 16        | NRIP2       | SM     |      | X  |            |                             |                           |                               |      |
| 16        | TMED6       | SM     |      |    |            |                             |                           |                               |      |
| 16        | ZNF785      | SM     |      |    |            |                             |                           |                               |      |
| 16        | C14orf39    | SM     | X    |    |            |                             |                           |                               |      |
| 16        | NLRP9       | SM     |      |    |            |                             |                           |                               |      |
| 16        | PILRB       | SM     | X    |    |            |                             |                           |                               |      |
| 16        | SNORD87     | SM     |      |    |            |                             |                           |                               |      |
| 16        | MCM3AP-AS1  | SM     |      |    |            |                             |                           |                               |      |
| 16        | TSPO        | SF     |      |    |            |                             |                           |                               |      |
| 16        | FCRLB       | SF     |      |    |            |                             |                           |                               |      |
| 16        | C1orf190    | SF     |      |    |            |                             |                           |                               |      |
| 16        | C3orf71     | SF     |      |    |            |                             |                           |                               |      |
| 16        | ZNF844      | SF     |      |    |            |                             |                           |                               |      |
| 16        | C17orf72    | SF     |      |    |            |                             |                           |                               |      |
| 16        | IGAM3       | SF     |      |    |            |                             |                           |                               |      |
| 16        | KCNS3       | SF     |      |    |            |                             |                           |                               |      |
| 16        | FKBP1B      | SF     |      |    |            |                             |                           |                               |      |
| 16        | NAIP        | SF     |      |    |            |                             |                           |                               |      |
| 16        | DCPS        | SF     |      |    |            |                             |                           |                               |      |
| 16        | KAZALD1     | SF     |      |    |            |                             |                           |                               |      |
| 16        | GAS2L3      | SF     |      |    |            |                             |                           |                               |      |
| 16        | SNORD11     | SF     |      |    |            |                             |                           |                               |      |
| 16        | LOC653075   | SF     |      |    |            |                             |                           |                               |      |
| 16        | CYBA        | VF     |      |    |            |                             |                           |                               |      |
| 16        | RPGR        | VF     |      |    |            |                             |                           |                               |      |
| 16        | IGFBP2      | VF     |      |    |            |                             |                           |                               |      |
| 16        | ZNF429      | VF     |      |    |            |                             |                           |                               |      |
| 16        | TTC3        | VF     |      |    |            |                             |                           |                               |      |
| 16        | KLHL5       | VF     |      |    |            |                             |                           |                               |      |

| 16        | GKS         | VF     |      |    |            |                             |     |                           |                               |      |
|-----------|-------------|--------|------|----|------------|-----------------------------|-----|---------------------------|-------------------------------|------|
| 16        | MAP9        | VF     |      |    |            |                             |     |                           |                               |      |
| 16        | CCDC12      | VF     |      |    |            |                             |     |                           |                               |      |
| 16        | CEP170      | VF     |      |    |            |                             |     |                           |                               |      |
| 16        | ZNF596      | VF     |      |    |            |                             |     |                           |                               |      |
| 16        | LRRN3       | VF     |      |    |            |                             |     |                           |                               |      |
| 16        | ZNF160      | VF     |      |    |            |                             |     |                           |                               |      |
| 16        | C3orf71     | VF     |      |    |            |                             |     |                           |                               |      |
| 16        | ZEB1        | VF     | X    |    | X          |                             |     |                           |                               |      |
| 16        | ZNF234      | VF     |      |    |            |                             |     |                           |                               |      |
| 16        | MTHFD2L     | VF     |      |    |            |                             |     |                           |                               |      |
| 16        | ZNF566      | VF     |      |    |            |                             |     |                           |                               |      |
| 16        | ZNF605      | VF     |      |    |            |                             |     |                           |                               |      |
| 16        | TESC        | VF     |      |    |            |                             |     |                           |                               |      |
| 16        | GOLGA4      | VF     |      |    |            |                             |     |                           |                               |      |
| 16        | MOSPD2      | VF     |      |    |            |                             |     |                           |                               |      |
| 16        | EIF4G3      | VF     |      |    |            |                             |     |                           |                               |      |
| 16        | NPTX2       | VF     |      |    |            |                             |     |                           |                               |      |
| 16        | RECQL       | VF     |      |    |            |                             |     |                           |                               |      |
| 16        | REV3L       | VF     |      |    |            |                             |     |                           |                               |      |
| 16        | ZNF85       | VF     | X    |    | X          |                             |     |                           |                               |      |
| 16        | SMARCA5     | VF     | X    |    | X          |                             |     |                           |                               |      |
| 16        | BLZF1       | VF     | X    |    | X          |                             |     |                           |                               |      |
| 16        | TRIP11      | VF     | X    |    | X          |                             |     |                           |                               |      |
| 16        | KIF5B       | VF     | X    |    | X          |                             |     |                           |                               |      |
| 16        | SRSF2IP     | VF     |      |    |            |                             |     |                           |                               |      |
| 16        | LPAR4       | VF     |      |    |            |                             |     |                           |                               |      |
| 16        | RADS0       | VF     |      |    |            |                             |     |                           |                               |      |
| 16        | POP7        | VF     |      |    |            |                             |     |                           |                               |      |
| 16        | TRDN        | VF     |      |    |            |                             |     |                           |                               |      |
| 16        | AVIL        | VF     | X    |    |            |                             |     |                           |                               |      |
| 16        | DIAPH2      | VF     |      |    |            |                             |     |                           |                               |      |
| 16        | POLI        | VF     |      |    |            |                             |     |                           |                               |      |
| 16        | ANKRD11     | VF     |      |    |            |                             |     |                           |                               |      |
| 16        | SYCP2       | VF     |      |    |            |                             |     |                           |                               |      |
| 16        | ANKRD26     | VF     | X    |    | X          |                             |     |                           |                               |      |
| 16        | ZC3H13      | VF     |      |    |            |                             |     |                           |                               |      |
| 16        | KIAA0776    | VF     |      |    |            |                             |     |                           |                               |      |
| 16        | EIF5B       | VF     |      |    |            |                             |     |                           |                               |      |
| 16        | TAOK3       | VF     |      |    |            |                             |     |                           |                               |      |
| 16        | MBD5        | VF     |      |    |            |                             |     |                           |                               |      |
| 16        | MNS1        | VF     |      |    |            |                             |     |                           |                               |      |
| 16        | ZNF273      | VF     |      |    |            |                             |     |                           |                               |      |
| 16        | ZNF462      | VF     |      |    |            |                             |     |                           |                               |      |
| 16        | ZNF514      | VF     | X    |    | X          |                             |     |                           |                               |      |
| 16        | ZNF354B     | VF     |      |    |            |                             |     |                           |                               |      |
| 16        | CHURC1      | VF     | X    | X  | X          |                             |     |                           |                               |      |
| 16        | TTC18       | VF     |      |    |            |                             |     |                           |                               |      |
| 16        | ZNF23       | VF     |      |    |            |                             |     |                           |                               |      |
| 16        | C19orf18    | VF     |      |    |            |                             |     |                           |                               |      |
| 16        | ZNF781      | VF     |      |    |            |                             |     |                           |                               |      |
| 16        | KLHDC1      | VF     |      |    |            |                             |     |                           |                               |      |
| 16        | C12orf61    | VF     |      |    |            |                             |     |                           |                               |      |
| 16        | ZNF283      | VF     |      |    |            |                             |     |                           |                               |      |
| 16        | ADAT2       | VF     |      |    |            |                             |     |                           |                               |      |
| 16        | LRRC37A3    | VF     |      |    |            |                             |     |                           |                               |      |
| 16        | LOC283104   | VF     |      |    |            |                             |     |                           |                               |      |
| Module ID | Gene Symbol | Tissue | eQTL | TF | Key Driver | Candidate gene in GWAS for: | CAD | Plasma glucose metabolism | Plasma cholesterol metabolism | T2DM |
| 20        | BTX         | AAW    |      |    |            |                             |     |                           |                               |      |
| 20        | C2          | AAW    |      |    |            |                             |     |                           |                               |      |
| 20        | IL2RG       | AAW    |      |    |            |                             |     |                           |                               |      |
| 20        | ITGB2       | AAW    |      |    |            |                             |     |                           |                               |      |
| 20        | JAK3        | AAW    |      |    |            |                             |     |                           |                               |      |
| 20        | LIPA        | AAW    |      |    | X          | X                           |     |                           |                               |      |
| 20        | LYZ         | AAW    |      |    |            |                             |     |                           |                               |      |
| 20        | CITTA       | AAW    | X    |    |            |                             |     |                           |                               |      |
| 20        | WAS         | AAW    |      |    |            |                             |     |                           |                               |      |
| 20        | CYBB        | AAW    |      |    |            |                             |     |                           |                               |      |
| 20        | GM2A        | AAW    |      |    |            |                             |     |                           |                               |      |
| 20        | NCF2        | AAW    |      |    |            |                             |     |                           |                               |      |
| 20        | AMPD3       | AAW    |      |    |            |                             |     |                           |                               |      |
| 20        | CDS3        | AAW    |      |    |            |                             |     |                           |                               |      |
| 20        | FCGR3A      | AAW    |      |    |            |                             |     |                           |                               |      |
| 20        | CR1         | AAW    |      |    |            |                             |     |                           |                               |      |
| 20        | CCR5        | AAW    |      |    |            |                             |     |                           |                               |      |
| 20        | NCF4        | AAW    |      |    |            |                             |     |                           |                               |      |
| 20        | ITGAM       | AAW    |      |    |            |                             |     |                           |                               |      |
| 20        | ALOX5       | AAW    |      |    |            |                             |     | X                         |                               |      |
| 20        | CD3D        | AAW    |      |    |            |                             |     |                           |                               |      |
| 20        | CD3E        | AAW    |      |    |            |                             |     |                           |                               |      |
| 20        | CD247       | AAW    |      |    |            |                             |     |                           |                               |      |

|             |     |   |   |   |   |   |  |  |  |
|-------------|-----|---|---|---|---|---|--|--|--|
| 20 ITGAX    | AAW |   |   |   |   |   |  |  |  |
| 20 ITGB7    | AAW |   |   |   |   |   |  |  |  |
| 20 KCNJ5    | AAW |   |   |   |   |   |  |  |  |
| 20 PTAFR    | AAW | X |   | X |   |   |  |  |  |
| 20 FCGR2B   | AAW |   |   |   |   |   |  |  |  |
| 20 EVI2A    | AAW |   |   |   |   |   |  |  |  |
| 20 SP140    | AAW |   | X |   |   |   |  |  |  |
| 20 PLAUR    | AAW |   |   |   |   |   |  |  |  |
| 20 RHBDF2   | AAW |   |   |   |   |   |  |  |  |
| 20 CPM      | AAW |   |   |   |   |   |  |  |  |
| 20 RPS6KA1  | AAW |   |   |   |   |   |  |  |  |
| 20 ARHGAP25 | AAW |   |   |   |   |   |  |  |  |
| 20 CXCR4    | AAW |   |   |   |   |   |  |  |  |
| 20 TFEC     | AAW |   | X |   |   |   |  |  |  |
| 20 ARHGAP30 | AAW |   |   |   |   |   |  |  |  |
| 20 RUNX3    | AAW |   | X |   |   |   |  |  |  |
| 20 KYNU     | AAW |   |   |   |   |   |  |  |  |
| 20 GLUL     | AAW |   |   |   |   |   |  |  |  |
| 20 MPEG1    | AAW |   |   |   |   |   |  |  |  |
| 20 C1orf38  | AAW |   |   |   |   |   |  |  |  |
| 20 MAP4K1   | AAW |   |   |   |   |   |  |  |  |
| 20 FGR      | AAW |   |   |   |   |   |  |  |  |
| 20 LCK      | AAW |   |   |   |   |   |  |  |  |
| 20 SLA      | AAW |   |   |   |   |   |  |  |  |
| 20 ARHGAP9  | AAW |   |   |   |   |   |  |  |  |
| 20 SPI1     | AAW |   | X |   | X |   |  |  |  |
| 20 LILRB2   | AAW |   |   |   |   | X |  |  |  |
| 20 LILRB4   | AAW |   |   |   |   |   |  |  |  |
| 20 LILRB1   | AAW |   |   |   |   |   |  |  |  |
| 20 FGD3     | AAW |   |   |   |   |   |  |  |  |
| 20 C17orf60 | AAW |   |   |   |   |   |  |  |  |
| 20 AMICA1   | AAW |   |   |   |   |   |  |  |  |
| 20 HPSE     | AAW |   |   |   |   |   |  |  |  |
| 20 RBM47    | AAW |   |   |   |   |   |  |  |  |
| 20 ACP5     | AAW |   |   |   |   |   |  |  |  |
| 20 ITGAL    | AAW |   |   |   |   |   |  |  |  |
| 20 BCL2A1   | AAW | X |   |   |   |   |  |  |  |
| 20 MRO      | AAW |   |   |   |   |   |  |  |  |
| 20 TMC6     | AAW |   |   |   |   |   |  |  |  |

|             |     |
|-------------|-----|
| 20 CCRL2    | AAW |
| 20 LILRA2   | AAW |
| 20 SYK      | AAW |
| 20 FCGR2A   | AAW |
| 20 PARVG    | AAW |
| 20 FAIM3    | AAW |
| 20 PIK3R5   | AAW |
| 20 LPAR5    | AAW |
| 20 DOK3     | AAW |
| 20 PLAU     | AAW |
| 20 SLCO2B1  | AAW |
| 20 SLC37A2  | AAW |
| 20 CD8A     | AAW |
| 20 SH2D2A   | AAW |
| 20 CSF2RA   | AAW |
| 20 MARCH1   | AAW |
| 20 PLA2G7   | AAW |
| 20 SIGLEC10 | AAW |
| 20 HCK      | AAW |
| 20 SLC38A6  | AAW |
| 20 SLC29A3  | AAW |
| 20 BCAT1    | AAW |
| 20 SLAMF6   | AAW |
| 20 CD84     | AAW |
| 20 NCKAP1L  | AAW |
| 20 CLDN7    | AAW |
| 20 CD22     | AAW |
| 20 CORO1A   | AAW |
| 20 FLVCR2   | AAW |
| 20 PLD5     | AAW |
| 20 SIGLEC9  | AAW |
| 20 NLRC4    | AAW |
| 20 PTPN7    | AAW |
| 20 CCR1     | AAW |
| 20 FABP5    | AAW |
| 20 IL10RA   | AAW |
| 20 CD2      | AAW |
| 20 SLC31A2  | AAW |
| 20 CTSB     | AAW |
| 20 FPR3     | AAW |



20 HK3      AAW  
20 HLA-DOA      AAW  
20 HMOX1      AAW

All\_modules

| Module ID | Gene Symbol | Tissue | eQTL | TF | Key Driver | Candidate gene in GWAS for: |                           |                               |      |
|-----------|-------------|--------|------|----|------------|-----------------------------|---------------------------|-------------------------------|------|
|           |             |        |      |    |            | CAD                         | Plasma glucose metabolism | Plasma cholesterol metabolism | T2DM |
| 20        | IRF8        | AA     |      | X  | X          |                             |                           |                               |      |
| 20        | LAIR1       | W      |      |    |            |                             |                           |                               |      |
| 20        | 1           | AA     |      |    |            |                             |                           |                               |      |
| 20        | LCP1        | AAW    |      |    |            |                             |                           |                               |      |
| 20        | MSR1        | AAW    |      |    |            |                             |                           |                               |      |
| 20        | PLEK        | AAW    |      |    |            |                             |                           |                               |      |
| 20        | MAPK13      | AAW    |      |    |            |                             |                           |                               |      |
| 20        | PTPN6       | AAW    |      |    |            |                             |                           |                               |      |
| 20        | CCL5        | AAW    |      |    |            |                             |                           |                               |      |
| 20        | CCL18       | AAW    |      |    |            |                             |                           |                               |      |
| 20        | SOAT1       | AAW    |      |    |            |                             |                           |                               |      |
| 20        | TLR1        | AAW    |      |    |            |                             |                           |                               |      |
| 20        | GPR65       | AAW    |      |    |            |                             |                           |                               |      |
| 20        | C3AR1       | AAW    |      |    |            |                             |                           |                               |      |
| 20        | FCER1G      | AAW    |      |    |            |                             |                           |                               |      |
| 20        | CD163       | AAW    |      |    |            |                             |                           |                               |      |
| 20        | RHOH        | AAW    |      |    |            |                             |                           |                               |      |
| 20        | ARRB2       | AAW    |      |    |            |                             |                           |                               |      |
| 20        | EPHB2       | AAW    |      |    |            |                             |                           |                               |      |
| 20        | GMFG        | AAW    |      |    |            |                             |                           |                               |      |
| 20        | ABCG1       | AAW    |      |    |            |                             |                           |                               |      |
| 20        | DOCK2       | AAW    |      |    |            |                             |                           |                               |      |
| 20        | VAV1        | AAW    |      | X  | X          |                             |                           |                               |      |
| 20        | MAFB        | AAW    |      | X  |            |                             |                           |                               |      |
| 20        | KCNE3       | AAW    |      |    |            |                             |                           | X                             |      |
| 20        | LCP2        | AAW    |      |    |            |                             |                           |                               |      |
| 20        | CD180       | AAW    |      |    |            |                             |                           |                               |      |
| 20        | ST8SIA4     | AAW    |      |    |            |                             |                           |                               |      |
| 20        | ARL4C       | AAW    |      |    |            |                             |                           |                               |      |
| 20        | IGSF6       | AAW    |      |    |            |                             |                           |                               |      |
| 20        | IKZF1       | AAW    |      | X  | X          |                             |                           |                               |      |
| 20        | CD28        | AAW    |      |    |            |                             |                           |                               |      |
| 20        | IFB3        | AAW    |      |    |            |                             |                           |                               |      |
| 20        | SMPDL3A     | AAW    |      |    |            |                             |                           |                               |      |
| 20        | CD6         | AAW    |      |    |            |                             |                           |                               |      |
| 20        | LAPTMS      | AAW    |      |    |            |                             |                           |                               |      |
| 20        | SDS         | AAW    |      |    |            |                             |                           |                               |      |
| 20        | RIPK3       | AAW    |      | X  |            |                             |                           |                               |      |
| 20        | CD86        | AAW    |      | X  | X          |                             |                           |                               |      |
| 20        | GALNT6      | AAW    |      |    |            |                             |                           |                               |      |
| 20        | CD300A      | AAW    |      |    |            |                             |                           |                               |      |
| 20        | HMHA1       | AAW    |      |    |            |                             |                           |                               |      |
| 20        | CYTH4       | AAW    |      |    |            |                             |                           |                               |      |
| 20        | PLRA        | AAW    |      |    |            |                             |                           |                               |      |
| 20        | LAT2        | AAW    |      |    |            |                             |                           |                               |      |
| 20        | SIGLEC7     | AAW    |      |    |            |                             |                           |                               |      |
| 20        | ACAP1       | AAW    |      |    |            |                             |                           |                               |      |
| 20        | SELLL3      | AAW    |      |    |            |                             |                           |                               |      |
| 20        | CLEC4A      | AAW    |      |    |            |                             |                           |                               |      |
| 20        | BIN2        | AAW    |      |    |            |                             |                           |                               |      |
| 20        | TLR7        | AAW    |      |    |            |                             |                           |                               |      |
| 20        | FAM20A      | AAW    |      |    |            |                             |                           |                               |      |
| 20        | CCDC109B    | AAW    |      |    |            |                             |                           |                               |      |
| 20        | FAR2        | AAW    |      |    |            |                             |                           |                               |      |
| 20        | ADAP2       | AAW    |      |    |            |                             |                           |                               |      |
| 20        | TBC1D2      | AAW    |      |    |            |                             |                           |                               |      |
| 20        | APOB48R     | AAW    |      |    |            |                             |                           |                               |      |
| 20        | SASH3       | AAW    |      |    |            |                             |                           |                               |      |
| 20        | APBB1IP     | AAW    |      |    |            |                             |                           |                               |      |
| 20        | CRTAM       | AAW    |      |    |            |                             |                           |                               |      |
| 20        | SLAMF8      | AAW    |      |    |            |                             |                           |                               |      |
| 20        | SLAMF7      | AAW    |      |    |            |                             |                           |                               |      |
| 20        | IL21R       | AAW    |      |    |            |                             |                           |                               |      |
| 20        | APOBEC3G    | AAW    |      |    |            |                             |                           |                               |      |
| 20        | ST14        | AAW    |      |    |            |                             |                           |                               |      |
| 20        | DEF6        | AAW    |      |    |            |                             |                           |                               |      |
| 20        | GPSM3       | AAW    |      |    |            |                             |                           |                               |      |
| 20        | DPEP2       | AAW    |      |    |            |                             |                           |                               |      |
| 20        | SUSD1       | AAW    |      |    |            |                             |                           |                               |      |
| 20        | CDCP1       | AAW    |      |    |            |                             |                           |                               |      |
| 20        | SIGLEC1     | AAW    |      |    |            |                             |                           |                               |      |
| 20        | PGBD5       | AAW    |      |    |            |                             |                           |                               |      |
| 20        | PLBD1       | AAW    |      |    |            |                             |                           |                               |      |
| 20        | DENND1C     | AAW    |      |    |            |                             |                           |                               |      |
| 20        | DENND2D     | AAW    |      |    |            |                             |                           |                               |      |
| 20        | TRAF3IP3    | AAW    |      |    |            |                             |                           |                               |      |
| 20        | TTHY3       | AAW    |      |    |            |                             |                           |                               |      |
| 20        | CYP2S1      | AAW    |      |    |            |                             |                           |                               |      |
| 20        | NPL         | AAW    |      |    |            |                             |                           |                               |      |
| 20        | TM7SF4      | AAW    |      |    |            |                             |                           |                               |      |

| 20        | RASSF4       | AAW    |      |    |            |                             |                           |                               |      |   |
|-----------|--------------|--------|------|----|------------|-----------------------------|---------------------------|-------------------------------|------|---|
| 20        | EMILIN2      | AAW    |      |    |            |                             |                           |                               |      |   |
| 20        | HAVCR2       | AAW    |      |    |            |                             |                           |                               |      |   |
| 20        | UBASH3B      | AAW    |      |    |            |                             |                           |                               |      | X |
| 20        | DNAIC5B      | AAW    |      |    |            |                             |                           |                               |      |   |
| 20        | C6orf192     | AAW    |      |    |            |                             |                           |                               |      |   |
| 20        | GNG2         | AAW    |      |    |            |                             |                           |                               |      |   |
| 20        | KLHL6        | AAW    |      |    |            |                             |                           |                               |      |   |
| 20        | OSCAR        | AAW    |      |    |            |                             |                           |                               |      |   |
| 20        | TLR8         | AAW    |      |    |            |                             |                           |                               |      |   |
| 20        | CD300LF      | AAW    |      |    |            |                             |                           |                               |      |   |
| 20        | NFAM1        | AAW    |      |    |            |                             |                           |                               |      |   |
| 20        | PIK3AP1      | AAW    |      |    |            |                             |                           |                               |      |   |
| 20        | TMEM86A      | AAW    |      |    |            |                             |                           |                               |      |   |
| 20        | CACNA2D4     | AAW    |      |    |            |                             |                           |                               |      |   |
| 20        | FGD2         | AAW    |      |    |            |                             |                           |                               |      |   |
| 20        | C1orf162     | AAW    |      |    |            |                             |                           |                               |      |   |
| 20        | C16orf54     | AAW    |      |    |            |                             |                           |                               |      |   |
| 20        | TBC1D10C     | AAW    |      |    |            |                             |                           |                               |      |   |
| 20        | LRR33        | AAW    |      |    |            |                             |                           |                               |      |   |
| Module ID | Gene Symbol  | Tissue | eQTL | TF | Key Driver | Candidate gene in GWAS for: |                           |                               |      |   |
|           |              |        |      |    |            | CAD                         | Plasma glucose metabolism | Plasma cholesterol metabolism | T2DM |   |
| 27        | GPR22        | IMA    |      |    |            |                             |                           |                               |      |   |
| 27        | RNF165       | IMA    |      |    |            |                             |                           |                               |      |   |
| 27        | ADORA3       | Liver  |      |    |            |                             |                           |                               |      |   |
| 27        | CADM2        | Liver  |      |    |            |                             |                           |                               |      |   |
| 27        | ZNF417       | Liver  |      |    |            |                             |                           |                               |      |   |
| 27        | LTF          | Blood  |      |    |            |                             |                           |                               |      |   |
| 27        | MMP8         | Blood  |      |    |            |                             |                           |                               |      |   |
| 27        | ESR1         | SM     |      | X  |            |                             |                           |                               |      |   |
| 27        | FUT1         | SM     |      |    |            |                             |                           |                               |      |   |
| 27        | NPHP1        | SM     |      |    |            |                             |                           |                               |      |   |
| 27        | MEOX1        | SM     |      | X  |            |                             |                           |                               |      |   |
| 27        | ELOVL7       | SM     |      |    |            |                             |                           |                               |      |   |
| 27        | FAM124B      | SM     |      |    |            |                             |                           |                               |      |   |
| 27        | PAX7         | SM     |      | X  |            |                             |                           |                               |      |   |
| 27        | ST6GALNAC3   | SM     |      |    |            |                             |                           |                               |      |   |
| 27        | CD300LG      | SM     |      |    |            |                             |                           |                               |      |   |
| 27        | ID1          | SM     |      | X  |            |                             |                           |                               |      |   |
| 27        | MYF5         | SM     |      | X  |            |                             |                           |                               |      |   |
| 27        | PLK2         | SM     |      |    |            |                             |                           |                               |      |   |
| 27        | PAGE4        | SM     |      |    |            |                             |                           |                               |      |   |
| 27        | RPA4         | SM     |      |    |            |                             |                           |                               |      |   |
| 27        | C13orf15     | SM     |      |    |            |                             |                           |                               |      |   |
| 27        | TMEM159      | SM     |      |    |            |                             |                           |                               |      |   |
| 27        | MCART1       | SM     | X    |    |            |                             |                           |                               |      |   |
| 27        | GBP4         | SM     |      |    |            |                             |                           |                               |      |   |
| 27        | ANKRD42      | SM     | X    |    |            |                             |                           |                               |      |   |
| 27        | NCRNA00201   | SM     |      |    |            |                             |                           |                               |      |   |
| 27        | LOC646329    | SM     |      |    |            |                             |                           |                               |      |   |
| 27        | LOC100289230 | SM     |      |    |            |                             |                           |                               |      |   |
| 27        | ADR82        | SF     |      |    |            |                             |                           |                               |      |   |
| 27        | FUT1         | SF     |      |    |            |                             |                           |                               |      |   |
| 27        | PNP          | SF     |      |    |            |                             |                           |                               |      |   |
| 27        | SCNN1B       | SF     |      |    |            |                             |                           |                               |      |   |
| 27        | NOTCH3       | SF     |      |    |            |                             |                           |                               |      |   |
| 27        | PECA1        | SF     |      |    |            |                             |                           |                               |      |   |
| 27        | TEK          | SF     |      |    |            |                             |                           |                               |      |   |
| 27        | VWF          | SF     |      |    |            |                             |                           |                               |      |   |
| 27        | IGFBP2       | SF     |      |    |            |                             |                           |                               |      |   |
| 27        | NOS3         | SF     |      |    |            |                             |                           |                               |      |   |
| 27        | ADRA2C       | SF     |      |    |            |                             |                           |                               |      |   |
| 27        | GUCY1B3      | SF     |      |    | X          | X                           |                           |                               |      |   |
| 27        | PTGER2       | SF     |      |    |            |                             |                           |                               |      |   |
| 27        | NRARP        | SF     |      |    |            |                             |                           |                               |      |   |
| 27        | SHE          | SF     |      |    |            |                             |                           |                               |      |   |
| 27        | OCAD2        | SF     |      |    |            |                             |                           |                               |      |   |
| 27        | PODXL        | SF     | X    |    |            |                             |                           |                               |      |   |
| 27        | SMAGP        | SF     |      |    |            |                             |                           |                               |      |   |
| 27        | MEOX1        | SF     |      | X  |            |                             |                           |                               |      |   |
| 27        | HEY1         | SF     |      | X  |            |                             |                           |                               |      |   |
| 27        | FAM107A      | SF     |      |    | X          |                             |                           |                               |      |   |
| 27        | ECSCR        | SF     |      |    |            |                             |                           |                               |      |   |
| 27        | SHANK3       | SF     |      |    |            |                             |                           |                               |      |   |
| 27        | PEAR1        | SF     |      |    |            |                             |                           |                               |      |   |
| 27        | ASRGL1       | SF     |      |    |            |                             |                           |                               |      |   |
| 27        | GPR116       | SF     |      |    |            |                             |                           |                               |      |   |
| 27        | PTPRB        | SF     |      |    |            |                             |                           |                               |      |   |
| 27        | PK3R3        | SF     |      |    |            |                             |                           |                               |      |   |
| 27        | FAM124B      | SF     |      |    |            |                             |                           |                               |      |   |
| 27        | IFI27        | SF     |      |    |            |                             |                           |                               |      |   |
| 27        | DYSF         | SF     |      |    |            |                             |                           |                               |      |   |

| 27        | CLDN5       | SF     |      |    |            |                             |                           |                               |      |  |
|-----------|-------------|--------|------|----|------------|-----------------------------|---------------------------|-------------------------------|------|--|
| 27        | SCN4B       | SF     |      |    |            |                             |                           |                               |      |  |
| 27        | SH2D3C      | SF     |      |    |            |                             |                           |                               |      |  |
| 27        | SGK1        | SF     |      |    |            |                             |                           |                               |      |  |
| 27        | PDE2A       | SF     |      |    |            |                             |                           |                               |      |  |
| 27        | GPR56       | SF     |      |    |            |                             |                           |                               |      |  |
| 27        | TM7         | SF     |      |    |            |                             |                           |                               |      |  |
| 27        | CD300LG     | SF     |      |    |            |                             |                           |                               |      |  |
| 27        | PPP1R16B    | SF     |      |    |            |                             |                           |                               |      |  |
| 27        | HSPA12B     | SF     |      |    |            |                             |                           |                               |      |  |
| 27        | ADCY4       | SF     |      |    |            |                             |                           |                               |      |  |
| 27        | TNFRSF8     | SF     |      |    |            |                             |                           |                               |      |  |
| 27        | CDH13       | SF     |      |    |            |                             |                           |                               |      |  |
| 27        | S1PR1       | SF     |      |    |            |                             |                           |                               |      |  |
| 27        | BMP6        | SF     |      |    |            |                             |                           |                               |      |  |
| 27        | CDH5        | SF     |      |    |            |                             |                           |                               |      |  |
| 27        | GJA4        | SF     |      |    |            |                             |                           |                               |      |  |
| 27        | GNAZ        | SF     |      |    |            |                             |                           |                               |      |  |
| 27        | ID1         | SF     |      | X  |            |                             |                           |                               |      |  |
| 27        | ID3         | SF     |      | X  |            |                             |                           |                               |      |  |
| 27        | IL3RA       | SF     |      |    |            |                             |                           |                               |      |  |
| 27        | KDR         | SF     |      |    |            |                             |                           |                               |      |  |
| 27        | MYC         | SF     |      | X  |            |                             |                           |                               |      |  |
| 27        | PDGFB       | SF     |      |    |            |                             |                           |                               |      |  |
| 27        | CXCL11      | SF     |      |    |            |                             |                           |                               |      |  |
| 27        | TAL1        | SF     |      | X  | X          |                             |                           |                               |      |  |
| 27        | IFITM1      | SF     |      |    |            |                             |                           |                               |      |  |
| 27        | SCARF1      | SF     |      |    |            |                             |                           |                               |      |  |
| 27        | HYAL2       | SF     |      |    |            |                             |                           |                               |      |  |
| 27        | HIP1R       | SF     |      |    |            |                             |                           |                               |      |  |
| 27        | EFNB2       | SF     |      |    |            |                             |                           |                               |      |  |
| 27        | DUSP5       | SF     |      |    |            |                             |                           |                               |      |  |
| 27        | EFNA1       | SF     |      |    |            |                             |                           |                               |      |  |
| 27        | EPHB4       | SF     |      |    |            |                             |                           |                               |      |  |
| 27        | NOTCH4      | SF     |      |    |            |                             |                           |                               |      |  |
| 27        | TGM2        | SF     |      |    |            |                             |                           |                               |      |  |
| 27        | TSPAN7      | SF     |      |    |            |                             |                           |                               |      |  |
| 27        | VIPR1       | SF     |      |    |            |                             |                           |                               |      |  |
| 27        | APLN        | SF     |      |    |            |                             |                           |                               |      |  |
| Module ID | Gene Symbol | Tissue | eQTL | TF | Key Driver | Candidate gene in GWAS for: |                           |                               |      |  |
|           |             |        |      |    |            | CAD                         | Plasma glucose metabolism | Plasma cholesterol metabolism | T2DM |  |
| 27        | GJA5        | SF     |      |    |            |                             |                           |                               |      |  |
| 27        | GPR4        | SF     |      |    |            |                             |                           |                               |      |  |
| 27        | TIE1        | SF     |      |    |            |                             |                           |                               |      |  |
| 27        | MALL        | SF     |      |    |            |                             |                           |                               |      |  |
| 27        | DLL1        | SF     |      |    |            |                             |                           |                               |      |  |
| 27        | MEOX2       | SF     |      | X  | X          |                             |                           |                               |      |  |
| 27        | TBX2        | SF     |      | X  | X          |                             |                           |                               |      |  |
| 27        | HCP5        | SF     | X    |    |            |                             |                           |                               |      |  |
| 27        | TUSC3       | SF     |      |    |            |                             |                           |                               |      |  |
| 27        | RAPGEF5     | SF     |      |    |            |                             |                           |                               |      |  |
| 27        | TM4SF1      | SF     |      |    |            |                             |                           |                               |      |  |
| 27        | GPR160      | SF     |      |    |            |                             |                           |                               |      |  |
| 27        | TSPAN13     | SF     |      |    |            |                             |                           |                               |      |  |
| 27        | PARM1       | SF     |      |    |            |                             |                           |                               |      |  |
| 27        | KIF26A      | SF     |      |    |            |                             |                           |                               |      |  |
| 27        | PLA1A       | SF     |      |    |            |                             |                           |                               |      |  |
| 27        | PLP         | SF     |      |    |            |                             |                           |                               |      |  |
| 27        | EGFL7       | SF     |      |    |            |                             |                           |                               |      |  |
| 27        | SLCO4A1     | SF     |      |    |            |                             |                           |                               |      |  |
| 27        | CLEC1A      | SF     |      |    |            |                             |                           |                               |      |  |
| 27        | PCDH12      | SF     |      |    |            |                             |                           |                               |      |  |
| 27        | NRN1        | SF     |      |    |            |                             |                           |                               |      |  |
| 27        | RASIP1      | SF     |      |    |            |                             |                           |                               |      |  |
| 27        | ROBO4       | SF     |      |    |            |                             |                           |                               |      |  |
| 27        | C8orf4      | SF     |      |    |            |                             |                           |                               |      |  |
| 27        | SHROOM4     | SF     |      |    |            |                             |                           |                               |      |  |
| 27        | JAM2        | SF     |      |    |            |                             |                           |                               |      |  |
| 27        | TRIB2       | SF     |      |    |            |                             |                           |                               |      |  |
| 27        | SOX17       | SF     |      | X  |            |                             |                           |                               |      |  |
| 27        | FRY         | SF     |      |    |            |                             |                           |                               |      |  |
| 27        | HOXD1       | SF     |      | X  | X          |                             |                           | X                             |      |  |
| 27        | TMEM204     | SF     |      |    |            |                             |                           |                               |      |  |
| 27        | Cxorf36     | SF     |      |    |            |                             |                           |                               |      |  |
| 27        | ZNF385D     | SF     |      |    |            |                             |                           |                               |      |  |
| 27        | GIMAP6      | SF     |      |    |            |                             |                           |                               |      |  |
| 27        | MIMRN2      | SF     |      |    |            |                             |                           |                               |      |  |
| 27        | ARHGEF15    | SF     |      |    |            |                             |                           |                               |      |  |
| 27        | MYC1        | SF     |      |    |            |                             |                           |                               |      |  |
| 27        | C17orf28    | SF     |      |    |            |                             |                           |                               |      |  |
| 27        | SQX7        | SF     |      | X  | X          |                             |                           |                               |      |  |
| 27        | SEMA6B      | SF     |      |    |            |                             |                           |                               |      |  |

| 27        | C2orf40      | SF     |      |    |            |                             |                           |                               |      |
|-----------|--------------|--------|------|----|------------|-----------------------------|---------------------------|-------------------------------|------|
| 27        | CYRF1        | SF     |      |    |            |                             |                           |                               |      |
| 27        | C21orf63     | SF     |      |    |            |                             |                           |                               |      |
| 27        | C20orf160    | SF     |      |    |            |                             |                           |                               |      |
| 27        | TSPAN18      | SF     |      |    |            |                             |                           |                               |      |
| 27        | RAB3C        | SF     |      |    |            |                             |                           |                               |      |
| 27        | ESAM         | SF     | X    |    |            |                             |                           |                               |      |
| 27        | CHMP4C       | SF     |      |    |            |                             |                           |                               |      |
| 27        | SLC16A14     | SF     |      |    |            |                             |                           |                               |      |
| 27        | FAM43A       | SF     |      |    |            |                             |                           |                               |      |
| 27        | CLEC14A      | SF     |      |    |            |                             |                           |                               |      |
| 27        | CMTM8        | SF     |      |    |            |                             |                           |                               |      |
| 27        | LRR70        | SF     |      |    |            |                             |                           |                               |      |
| 27        | MFSO4        | SF     |      |    |            |                             |                           |                               |      |
| 27        | BCL6B        | SF     |      | X  |            |                             |                           |                               |      |
| 27        | KANK3        | SF     |      |    |            |                             |                           |                               |      |
| 27        | GALNTL4      | SF     |      |    |            |                             |                           |                               |      |
| 27        | LOC401022    | SF     |      |    |            |                             |                           |                               |      |
| 27        | LOC644242    | SF     |      |    |            |                             |                           |                               |      |
| 27        | LOC100507463 | SF     |      |    |            |                             |                           |                               |      |
| 27        | RRBP1        | VF     |      |    |            |                             |                           |                               |      |
| 27        | IFI27        | VF     |      |    |            |                             |                           |                               |      |
| 27        | IFTM1        | VF     |      |    |            |                             |                           |                               |      |
| 27        | CITL1        | VF     |      | X  |            |                             |                           |                               |      |
| 27        | SNORD36A     | VF     |      |    |            |                             |                           |                               |      |
| 27        | FLJ14107     | VF     |      |    |            |                             |                           |                               |      |
| Module ID | Gene Symbol  | Tissue | eQTL | TF | Key Driver | Candidate gene in GWAS for: |                           |                               |      |
|           |              |        |      |    |            | CAD                         | Plasma glucose metabolism | Plasma cholesterol metabolism | T2DM |
| 29        | ADR82        | AAW    |      |    |            |                             |                           |                               |      |
| 29        | CA2          | AAW    |      |    |            |                             |                           |                               |      |
| 29        | CD3G         | AAW    |      |    |            |                             |                           |                               |      |
| 29        | CHRNA1       | AAW    |      |    |            |                             |                           |                               |      |
| 29        | F13A1        | AAW    |      |    |            |                             |                           |                               |      |
| 29        | HK2          | AAW    |      |    |            |                             |                           |                               |      |
| 29        | ICAM1        | AAW    |      |    |            |                             |                           |                               |      |
| 29        | LAMB3        | AAW    |      |    |            |                             |                           |                               |      |
| 29        | SNCA         | AAW    |      |    |            |                             |                           |                               |      |
| 29        | IL2RA        | AAW    |      |    |            |                             |                           |                               |      |
| 29        | FBP1         | AAW    |      |    |            |                             |                           |                               |      |
| 29        | IL1RN        | AAW    |      |    |            |                             |                           |                               |      |
| 29        | SLC11A1      | AAW    |      |    |            |                             |                           |                               |      |
| 29        | SPP1         | AAW    |      |    |            |                             |                           |                               |      |
| 29        | FASLG        | AAW    |      |    |            |                             |                           |                               |      |
| 29        | GRIA1        | AAW    |      |    |            |                             |                           |                               |      |
| 29        | IL2RB        | AAW    |      |    |            |                             |                           |                               |      |
| 29        | IL7          | AAW    |      |    |            |                             |                           |                               |      |
| 29        | NPR3         | AAW    |      |    |            |                             |                           |                               |      |
| 29        | PLCB4        | AAW    |      |    |            |                             |                           |                               |      |
| 29        | PTGER2       | AAW    |      |    |            |                             |                           |                               |      |
| 29        | EPSTI1       | AAW    |      |    |            |                             |                           |                               |      |
| 29        | GATA3        | AAW    |      | X  | X          |                             |                           |                               |      |
| 29        | FAT3         | AAW    |      |    |            |                             |                           |                               |      |
| 29        | THEMIS       | AAW    |      |    |            |                             |                           |                               |      |
| 29        | CARD16       | AAW    |      |    |            |                             |                           |                               |      |
| 29        | CXorf65      | AAW    |      |    |            |                             |                           |                               |      |
| 29        | CD83         | AAW    |      |    |            |                             |                           |                               |      |
| 29        | SULT1C2      | AAW    |      |    |            |                             |                           |                               |      |
| Module ID | Gene Symbol  | Tissue | eQTL | TF | Key Driver | Candidate gene in GWAS for: |                           |                               |      |
|           |              |        |      |    |            | CAD                         | Plasma glucose metabolism | Plasma cholesterol metabolism | T2DM |
| 29        | DUSP27       | AAW    |      |    |            |                             |                           |                               |      |
| 29        | PRF1         | AAW    |      |    |            |                             |                           |                               |      |
| 29        | GPR1         | AAW    |      |    |            |                             |                           |                               |      |
| 29        | PNMAL1       | AAW    |      |    |            |                             |                           |                               |      |
| 29        | ANKRD58      | AAW    |      |    |            |                             |                           |                               |      |
| 29        | GSG1L        | AAW    |      |    |            |                             |                           |                               |      |
| 29        | SCIN         | AAW    | X    |    |            |                             |                           |                               |      |
| 29        | GF11         | AAW    |      |    |            |                             |                           |                               |      |
| 29        | TFR3         | AAW    |      |    |            |                             |                           |                               |      |
| 29        | PAK3         | AAW    |      |    |            |                             |                           |                               |      |
| 29        | TSPAN14      | AAW    |      |    |            |                             |                           |                               |      |
| 29        | RASGRP1      | AAW    |      |    |            |                             |                           |                               | X    |
| 29        | CCL20        | AAW    |      |    |            |                             |                           |                               |      |
| 29        | COL13A1      | AAW    |      |    |            |                             |                           |                               |      |
| 29        | PLAC8        | AAW    |      |    |            |                             |                           |                               |      |
| 29        | GBP5         | AAW    |      |    |            |                             |                           |                               |      |
| 29        | CXCR3        | AAW    |      |    |            |                             |                           |                               |      |
| 29        | TMEM71       | AAW    |      |    |            |                             |                           |                               |      |
| 29        | RASGRP4      | AAW    |      |    |            |                             |                           |                               |      |
| 29        | GPR85        | AAW    |      |    |            |                             |                           |                               |      |
| 29        | PMF8P1       | AAW    |      |    |            |                             |                           |                               |      |
| 29        | C1orf113     | AAW    |      |    |            |                             |                           |                               |      |
| 29        | PPP1R9A      | AAW    |      |    |            |                             |                           |                               |      |

| 29        | CD244       | AAW    |      |    |            |                             |                           |                               |      |
|-----------|-------------|--------|------|----|------------|-----------------------------|---------------------------|-------------------------------|------|
| 29        | CD8B        | AAW    |      |    |            |                             |                           |                               |      |
| 29        | TUBB3       | AAW    |      |    |            |                             |                           |                               |      |
| 29        | PRDM1       | AAW    | X    |    | X          |                             |                           |                               |      |
| 29        | LMNB1       | AAW    |      |    |            |                             |                           |                               |      |
| 29        | KLRK1       | AAW    |      |    |            |                             |                           |                               |      |
| 29        | GPLD1       | AAW    |      |    |            |                             |                           |                               |      |
| 29        | ACADL       | AAW    |      |    |            |                             |                           |                               |      |
| 29        | C5AR1       | AAW    |      |    |            |                             |                           |                               |      |
| 29        | CD1D        | AAW    |      |    |            |                             |                           |                               |      |
| 29        | CNTN1       | AAW    |      |    |            |                             |                           |                               |      |
| 29        | CTSD        | AAW    |      |    |            |                             |                           |                               |      |
| 29        | TNC         | AAW    |      |    |            |                             |                           |                               |      |
| 29        | KCNA3       | AAW    |      |    |            |                             |                           |                               |      |
| 29        | KLRB1       | AAW    |      |    |            |                             |                           |                               |      |
| 29        | MNDA        | AAW    |      |    |            |                             |                           |                               |      |
| 29        | MX2         | AAW    |      |    |            |                             |                           |                               |      |
| 29        | RGS1        | AAW    |      |    |            |                             |                           |                               |      |
| 29        | SFRP1       | AAW    |      |    |            |                             |                           |                               |      |
| 29        | STAC        | AAW    |      |    |            |                             |                           |                               |      |
| 29        | UGCG        | AAW    |      |    |            |                             |                           |                               |      |
| 29        | CHIT1       | AAW    |      |    |            |                             |                           |                               |      |
| 29        | OASL        | AAW    | X    |    | X          |                             |                           |                               |      |
| 29        | MIFM1       | AAW    |      |    |            |                             |                           |                               |      |
| 29        | SIGLECS     | AAW    |      |    |            |                             |                           |                               |      |
| 29        | TNFRSF11A   | AAW    |      |    |            |                             |                           |                               |      |
| 29        | GZMB        | AAW    |      |    |            |                             |                           |                               |      |
| 29        | ECM1        | AAW    |      |    |            |                             |                           |                               |      |
| 29        | VNN1        | AAW    |      |    |            |                             |                           |                               |      |
| 29        | DSC2        | AAW    |      |    |            |                             |                           |                               |      |
| 29        | GPR183      | AAW    |      |    |            |                             |                           |                               |      |
| 29        | PPARG       | AAW    | X    |    | X          |                             |                           |                               |      |
| 29        | SCD         | AAW    |      |    |            |                             |                           |                               |      |
| 29        | ITGAD       | AAW    |      |    |            |                             |                           |                               |      |
| 29        | ITK         | AAW    |      |    |            |                             |                           |                               |      |
| 29        | PTPRCAP     | AAW    |      |    |            |                             |                           |                               |      |
| 29        | LHFPL2      | AAW    |      |    |            |                             |                           |                               |      |
| 29        | CD96        | AAW    |      |    |            |                             |                           |                               |      |
| 29        | MICB        | AAW    |      |    |            |                             |                           |                               |      |
| 29        | HS3ST3A1    | AAW    |      |    |            |                             |                           |                               |      |
| 29        | HS3ST2      | AAW    |      |    |            |                             |                           |                               |      |
| 29        | POU2AF1     | AAW    | X    |    | X          |                             |                           |                               |      |
| 29        | CCL7        | AAW    |      |    |            |                             |                           |                               |      |
| 29        | CD226       | AAW    |      |    |            |                             |                           |                               |      |
| 29        | MARCO       | AAW    |      |    |            |                             |                           |                               |      |
| 29        | SLC22A18A5  | AAW    |      |    |            |                             |                           |                               |      |
| 29        | CIT         | AAW    |      |    |            |                             |                           |                               |      |
| 29        | ICOS        | AAW    |      |    |            |                             |                           |                               |      |
| 29        | LILRA4      | AAW    |      |    |            |                             |                           |                               |      |
| 29        | TSPAN15     | AAW    | X    |    | X          |                             |                           |                               |      |
| 29        | QPCT        | AAW    |      |    |            |                             |                           |                               |      |
| 29        | STAG3       | AAW    |      |    |            |                             |                           |                               |      |
| 29        | TBX21       | AAW    | X    |    | X          |                             |                           |                               |      |
| 29        | ADAM28      | AAW    |      |    |            |                             |                           |                               |      |
| 29        | GPR160      | AAW    |      |    |            |                             |                           |                               |      |
| 29        | SIT1        | AAW    |      |    |            |                             |                           |                               |      |
| 29        | HPGD5       | AAW    |      |    |            |                             |                           |                               |      |
| 29        | RP5SKA6     | AAW    |      |    |            |                             |                           |                               |      |
| 29        | MOXD1       | AAW    |      |    |            |                             |                           |                               |      |
| 29        | TRAT1       | AAW    |      |    |            |                             |                           |                               |      |
| 29        | CECR1       | AAW    | X    |    |            |                             |                           |                               |      |
| 29        | SLC16A10    | AAW    |      |    |            |                             |                           |                               |      |
| 29        | TREM1       | AAW    |      |    |            |                             |                           |                               |      |
| 29        | KIAA1199    | AAW    |      |    |            |                             |                           |                               |      |
| 29        | SEPT3       | AAW    |      |    |            |                             |                           |                               |      |
| 29        | RPGRIP1     | AAW    |      |    |            |                             |                           |                               |      |
| 29        | C12orf5     | AAW    |      |    |            |                             |                           |                               |      |
| 29        | CNTN3       | AAW    |      |    |            |                             |                           |                               |      |
| 29        | CCDC146     | AAW    |      |    |            |                             |                           |                               |      |
| 29        | XK          | AAW    |      |    |            |                             |                           |                               |      |
| 29        | SLC22A3     | AAW    |      |    |            |                             |                           |                               |      |
| 29        | DEPTOR      | AAW    |      |    |            |                             |                           |                               |      |
| 29        | BCL11B      | AAW    |      |    |            |                             |                           |                               |      |
| 29        | C5orf23     | AAW    |      |    |            |                             |                           |                               |      |
| 29        | TMEM149     | AAW    |      |    |            |                             |                           |                               |      |
| Module ID | Gene Symbol | Tissue | eQTL | TF | Key Driver | Candidate gene in GWAS for: |                           |                               |      |
|           |             |        |      |    |            | CAD                         | Plasma glucose metabolism | Plasma cholesterol metabolism | T2DM |
| 29        | THSD4       | AAW    |      |    |            |                             |                           |                               |      |
| 29        | PRAM1       | AAW    |      |    |            |                             |                           |                               |      |
| 29        | PKIB        | AAW    |      |    |            |                             |                           |                               |      |
| 29        | NLRP12      | AAW    |      |    |            |                             |                           |                               |      |
| 29        | GZMH        | AAW    |      |    |            |                             |                           |                               |      |

| 29        | C2orf65     | AAW    |      |    |            |     |                             |                               |      |
|-----------|-------------|--------|------|----|------------|-----|-----------------------------|-------------------------------|------|
| 29        | DNER        | AAW    |      |    |            |     |                             |                               |      |
| 29        | SPOCD1      | AAW    |      |    |            |     |                             |                               |      |
| 29        | PAQR4       | AAW    |      |    |            |     |                             |                               |      |
| 29        | RASGEF1B    | AAW    |      |    |            |     |                             |                               |      |
| 29        | NEGR1       | AAW    |      |    |            |     |                             |                               |      |
| 29        | UAP1L1      | AAW    |      |    |            |     |                             |                               |      |
| 29        | KBTBD12     | AAW    |      |    |            |     |                             |                               |      |
| 29        | LOC283050   | AAW    |      |    |            |     |                             |                               |      |
| 29        | LOC401093   | AAW    |      |    |            |     |                             |                               |      |
| 29        | CRNDE       | AAW    | X    |    |            |     | X                           |                               |      |
| 29        | LOC439949   | AAW    |      |    |            |     |                             |                               |      |
| 29        | DDTL        | IMA    | X    |    |            |     |                             |                               |      |
| 29        | MG37042     | IMA    |      |    |            |     |                             |                               |      |
| 29        | SFRP1       | IMA    | X    |    |            |     |                             |                               |      |
| 29        | SLIT2       | IMA    |      |    |            |     |                             |                               |      |
| 29        | PCP4        | IMA    | X    |    |            |     |                             |                               |      |
| 29        | CYFP2       | Liver  | X    |    |            |     |                             |                               |      |
| 29        | DEPDC1B     | Liver  |      |    |            |     |                             |                               |      |
| 29        | MGAM        | Liver  |      |    |            |     |                             |                               |      |
| 29        | B4GALT5     | Liver  | X    |    |            |     |                             |                               |      |
| 29        | HYMAI       | Liver  |      |    |            |     |                             |                               |      |
| 29        | LOC650623   | Liver  |      |    |            |     |                             |                               |      |
| 29        | SH1544      | Blood  |      |    |            |     |                             |                               |      |
| 29        | ITGA2B      | SF     |      |    |            |     |                             |                               |      |
| Module ID | Gene Symbol | Tissue | eQTL | TF | Key Driver | CAD | Candidate gene in GWAS for: |                               |      |
|           |             |        |      |    |            |     | Plasma glucose metabolism   | Plasma cholesterol metabolism | T2DM |
| 35        | HLA-DQA1    | Blood  | X    |    |            |     |                             |                               |      |
| 35        | ALPL        | VF     |      |    |            |     |                             |                               |      |
| 35        | MP2         | VF     |      |    |            |     |                             |                               |      |
| 35        | C10orf55    | VF     |      |    |            |     |                             |                               |      |
| 35        | SPDYE3      | VF     |      |    |            |     |                             |                               |      |
| 35        | ODF2L       | VF     |      |    |            |     |                             |                               |      |
| 35        | ZNF182      | VF     |      |    |            |     |                             |                               |      |
| 35        | ZNF37A      | VF     |      | X  |            |     |                             |                               |      |
| 35        | KUHD09      | VF     |      |    |            |     |                             |                               |      |
| 35        | ZMAT1       | VF     |      |    |            |     |                             |                               |      |
| 35        | CCDC66      | VF     |      |    |            |     |                             |                               |      |
| 35        | ZNF638      | VF     |      |    |            |     |                             |                               |      |
| 35        | VPS13A      | VF     |      |    |            |     |                             |                               |      |
| 35        | ZNF816      | VF     |      |    |            |     |                             |                               |      |
| 35        | TMEM98      | VF     |      |    |            |     |                             |                               |      |
| 35        | ZNF493      | VF     |      |    |            |     |                             |                               |      |
| 35        | ZNF682      | VF     |      |    |            |     |                             |                               |      |
| 35        | BCLAF1      | VF     |      | X  | X          |     |                             |                               |      |
| 35        | SP100       | VF     |      | X  | X          |     |                             |                               |      |
| 35        | THOC2       | VF     |      |    |            |     |                             |                               |      |
| 35        | LNP1        | VF     |      |    |            |     |                             |                               |      |
| 35        | GPRASP1     | VF     |      |    |            |     |                             |                               |      |
| 35        | ZNF146      | VF     |      |    |            |     |                             |                               |      |
| 35        | NAPEPLD     | VF     |      |    |            |     |                             |                               |      |
| 35        | BSCL2       | VF     | X    |    |            |     |                             |                               |      |
| 35        | ZNF84       | VF     |      |    |            |     |                             |                               |      |
| 35        | ISLR2       | VF     |      |    |            |     |                             |                               |      |
| 35        | ZNF195      | VF     |      |    |            |     |                             |                               |      |
| 35        | C2orf63     | VF     | X    |    | X          |     |                             |                               |      |
| 35        | SMC6        | VF     |      |    |            |     |                             |                               |      |
| 35        | DMTF1       | VF     |      | X  |            |     |                             |                               |      |
| 35        | GAS2        | VF     |      |    |            |     |                             |                               |      |
| 35        | GORAB       | VF     |      |    |            |     |                             |                               |      |
| 35        | RPAP3       | VF     |      |    |            |     |                             |                               |      |
| 35        | ANK3        | VF     |      |    |            |     |                             |                               |      |
| 35        | ZNF138      | VF     |      | X  |            |     |                             |                               |      |
| 35        | LY6K        | VF     |      |    |            |     |                             |                               |      |
| 35        | ALDH4A1     | VF     |      |    |            |     |                             |                               |      |
| 35        | ANKRD36     | VF     |      |    |            |     |                             |                               |      |
| 35        | SCUB2       | VF     | X    |    |            |     |                             |                               |      |
| 35        | ZNF430      | VF     |      |    |            |     |                             |                               |      |
| 35        | TMEM185A    | VF     |      |    |            |     |                             |                               |      |
| 35        | IFT80       | VF     |      |    |            |     |                             |                               |      |
| 35        | RPH3AL      | VF     |      |    |            |     |                             |                               |      |
| 35        | DHFR1L1     | VF     |      |    |            |     |                             |                               |      |
| 35        | ALCAM       | VF     |      |    |            |     |                             |                               |      |
| 35        | CYC1        | VF     |      |    |            |     |                             |                               |      |
| 35        | HMOX1       | VF     |      |    |            |     |                             |                               |      |
| 35        | ITPR2       | VF     |      |    |            |     |                             |                               |      |
| 35        | MGMT        | VF     | X    |    |            |     |                             |                               |      |
| 35        | MGST2       | VF     | X    |    |            |     |                             |                               |      |
| 35        | MYL5        | VF     |      |    |            |     |                             |                               |      |
| 35        | NDUFB3      | VF     |      |    |            |     |                             |                               |      |
| 35        | PNN         | VF     |      |    |            |     |                             |                               |      |
| 35        | MRPL12      | VF     |      |    |            |     |                             |                               |      |

| 35        | ZNF267       | VF     |      |    |            |                             |                           |                               |      |
|-----------|--------------|--------|------|----|------------|-----------------------------|---------------------------|-------------------------------|------|
| 35        | ZNF136       | VF     |      | X  | X          |                             |                           |                               |      |
| 35        | OFD1         | VF     |      |    |            |                             |                           |                               |      |
| 35        | AKR7A2       | VF     |      |    |            |                             |                           |                               |      |
| 35        | TRIM24       | VF     |      | X  |            |                             |                           |                               |      |
| 35        | GPRC5A       | VF     |      |    |            |                             |                           |                               |      |
| 35        | UCHL1        | VF     |      |    |            |                             |                           |                               |      |
| 35        | BPTF         | VF     |      | X  |            |                             |                           |                               |      |
| 35        | NAIP         | VF     |      |    |            |                             |                           |                               |      |
| 35        | RAB5C        | VF     |      | X  | X          |                             |                           |                               |      |
| 35        | THOC1        | VF     |      | X  |            |                             |                           |                               |      |
| Module ID | Gene Symbol  | Tissue | eQTL | TF | Key Driver | Candidate gene in GWAS for: |                           |                               |      |
|           |              |        |      |    |            | CAD                         | Plasma glucose metabolism | Plasma cholesterol metabolism | T2DM |
| 35        | SMC3         | VF     |      |    |            |                             |                           |                               |      |
| 35        | AKAP9        | VF     |      |    |            |                             |                           |                               |      |
| 35        | LUC7L3       | VF     |      |    |            |                             |                           |                               |      |
| 35        | PCM1         | VF     |      |    |            |                             |                           |                               |      |
| 35        | PLCL1        | VF     |      |    |            |                             |                           |                               |      |
| 35        | IFT88        | VF     |      |    |            |                             |                           |                               |      |
| 35        | ZNF33A       | VF     |      | X  | X          |                             |                           |                               |      |
| 35        | ZNF33B       | VF     |      | X  |            |                             |                           |                               |      |
| 35        | ZNF90        | VF     |      | X  |            |                             |                           |                               |      |
| 35        | ZNF92        | VF     |      | X  | X          |                             |                           |                               |      |
| 35        | TMM10        | VF     | X    |    |            |                             |                           |                               |      |
| 35        | SMUG1        | VF     |      |    |            |                             |                           |                               |      |
| 35        | ARHGEF16     | VF     |      |    |            |                             |                           |                               |      |
| 35        | CEP350       | VF     |      |    |            |                             |                           |                               |      |
| 35        | DDX46        | VF     |      |    |            |                             |                           |                               |      |
| 35        | ZNF292       | VF     |      |    |            |                             |                           |                               |      |
| 35        | SMC5         | VF     |      |    |            |                             |                           |                               |      |
| 35        | PRRC2C       | VF     |      |    |            |                             |                           |                               |      |
| 35        | PPWD1        | VF     |      |    |            |                             |                           |                               |      |
| 35        | NIPBL        | VF     |      |    |            |                             |                           |                               |      |
| 35        | ZNF10        | VF     |      |    |            |                             |                           |                               |      |
| 35        | SEC31B       | VF     |      |    |            |                             |                           |                               |      |
| 35        | SFRS18       | VF     |      |    |            |                             |                           |                               |      |
| 35        | UPF2         | VF     |      |    |            |                             |                           |                               |      |
| 35        | B9D1         | VF     |      |    |            |                             |                           |                               |      |
| 35        | FAM184B      | VF     |      |    |            |                             |                           |                               |      |
| 35        | NOP58        | VF     |      |    |            |                             |                           |                               |      |
| 35        | XAF1         | VF     | X    |    | X          |                             |                           |                               |      |
| 35        | PRPF40A      | VF     |      |    |            |                             |                           |                               |      |
| 35        | PHIP         | VF     |      |    |            |                             |                           |                               |      |
| 35        | NOL8         | VF     |      |    |            |                             |                           |                               |      |
| 35        | C10orf118    | VF     |      |    |            |                             |                           |                               |      |
| 35        | CCAR1        | VF     |      |    |            |                             |                           |                               |      |
| 35        | CL4orf106    | VF     |      |    |            |                             |                           |                               |      |
| 35        | MLL5         | VF     |      | X  | X          |                             |                           |                               |      |
| 35        | CCDC76       | VF     |      |    |            |                             |                           |                               |      |
| 35        | CLK4         | VF     |      |    |            |                             |                           |                               |      |
| 35        | ZFP14        | VF     |      |    |            |                             |                           |                               |      |
| 35        | RBM26        | VF     |      |    |            |                             |                           |                               |      |
| 35        | IFIH1        | VF     |      |    |            |                             |                           |                               |      |
| 35        | UPF3B        | VF     |      |    |            |                             |                           |                               |      |
| 35        | CCDC86       | VF     |      |    |            |                             |                           |                               |      |
| 35        | EEP1         | VF     |      |    |            |                             |                           |                               |      |
| 35        | ZRANB3       | VF     |      |    |            |                             |                           |                               |      |
| 35        | EFCAB7       | VF     |      |    |            |                             |                           |                               |      |
| 35        | ZNF594       | VF     |      |    |            |                             |                           |                               |      |
| 35        | ZNF382       | VF     |      | X  |            |                             |                           |                               |      |
| 35        | KIAA1731     | VF     |      |    |            |                             |                           |                               |      |
| 35        | ESCO1        | VF     |      |    |            |                             |                           |                               |      |
| 35        | XAGE3        | VF     |      |    |            |                             |                           |                               |      |
| 35        | ZNF675       | VF     |      | X  |            |                             |                           |                               |      |
| 35        | LEO1         | VF     |      |    |            |                             |                           |                               |      |
| 35        | SCLT1        | VF     | X    |    | X          |                             |                           |                               |      |
| 35        | UBLC1        | VF     |      |    |            |                             |                           |                               |      |
| 35        | ZUFSP        | VF     |      |    |            |                             |                           |                               |      |
| 35        | SH3RF2       | VF     | X    |    |            |                             |                           |                               |      |
| 35        | ZNF567       | VF     |      |    |            |                             |                           |                               |      |
| 35        | SAMD9L       | VF     |      |    |            |                             |                           |                               |      |
| 35        | ZNF75A       | VF     |      |    |            |                             |                           |                               |      |
| 35        | GOLGA8A      | VF     |      |    |            |                             |                           |                               |      |
| 35        | ZNF600       | VF     |      |    |            |                             |                           |                               |      |
| 35        | CCDC18       | VF     | X    |    |            |                             |                           |                               |      |
| 35        | SNORD87      | VF     |      |    |            |                             |                           |                               |      |
| 35        | MALAT1       | VF     |      |    |            |                             |                           |                               |      |
| 35        | LOC100009676 | VF     |      |    |            |                             |                           |                               |      |
| 35        | ZNF379P      | VF     |      |    |            |                             |                           |                               |      |
| 35        | NCRNA00201   | VF     |      |    |            |                             |                           |                               |      |
| 35        | CG030        | VF     |      |    |            |                             |                           |                               |      |
| 35        | RPL21P44     | VF     |      |    |            |                             |                           |                               |      |



| Module ID | Gene Symbol  | Tissue | eQTL | TF | Key Driver | CAD | Candidate gene in GWAS for: |                               | T2DM |
|-----------|--------------|--------|------|----|------------|-----|-----------------------------|-------------------------------|------|
|           |              |        |      |    |            |     | Plasma glucose metabolism   | Plasma cholesterol metabolism |      |
| 35        | NSUN5P1      | VF     |      |    |            |     |                             |                               |      |
| 35        | LOC100132352 | VF     |      |    |            |     |                             |                               |      |
| 35        | LOC100499177 | VF     |      |    |            |     |                             |                               |      |
| 35        | LOC100294145 | VF     |      |    |            |     |                             |                               |      |
| 36        | LAMA3        | SM     |      |    |            |     |                             |                               |      |
| 36        | PNP          | SM     |      |    |            |     |                             |                               |      |
| 36        | PECAM1       | SM     |      |    |            |     |                             |                               |      |
| 36        | TEK          | SM     |      |    |            |     |                             |                               |      |
| 36        | ALPL         | SM     |      |    |            |     |                             |                               |      |
| 36        | VWF          | SM     |      |    |            |     |                             |                               |      |
| 36        | IGFBP2       | SM     |      |    |            |     |                             |                               |      |
| 36        | GUCY1B3      | SM     |      |    |            | X   |                             |                               |      |
| 36        | ICAM2        | SM     |      |    |            |     |                             |                               |      |
| 36        | NRARP        | SM     |      |    |            |     |                             |                               |      |
| 36        | SHE          | SM     |      |    |            |     |                             |                               |      |
| 36        | TRNP1        | SM     |      |    |            |     |                             |                               |      |
| 36        | PODXL        | SM     |      |    |            |     |                             |                               |      |
| 36        | CD74         | SM     |      |    |            |     |                             |                               |      |
| 36        | SMAGP        | SM     |      |    |            |     |                             |                               |      |
| 36        | NOSTRIN      | SM     |      | X  |            |     |                             |                               |      |
| 36        | SSTR1        | SM     |      |    |            |     |                             |                               |      |
| 36        | TBXA2R       | SM     |      |    |            |     |                             |                               |      |
| 36        | FAM107A      | SM     |      |    |            |     |                             |                               |      |
| 36        | ECSR         | SM     |      |    |            |     |                             |                               |      |
| 36        | SHANK3       | SM     |      |    |            |     |                             |                               |      |
| 36        | CCDC85A      | SM     |      |    |            |     |                             |                               |      |
| 36        | PEAR1        | SM     |      |    |            |     |                             |                               |      |
| 36        | TMEM22       | SM     |      |    |            |     |                             |                               |      |
| 36        | HLA-F        | SM     |      |    |            |     |                             |                               |      |
| 36        | GPR116       | SM     |      |    |            |     |                             |                               |      |
| 36        | MRVI1        | SM     |      |    |            |     |                             |                               |      |
| 36        | MECOM        | SM     |      | X  | X          |     |                             |                               |      |
| 36        | PTPRB        | SM     |      |    |            |     |                             |                               |      |
| 36        | PK3R3        | SM     |      |    |            |     |                             |                               |      |
| 36        | SLC14A1      | SM     |      |    |            |     |                             |                               |      |
| 36        | LRR32        | SM     |      |    |            |     |                             |                               |      |
| 36        | IFI27        | SM     |      |    |            |     |                             |                               |      |
| 36        | CSGALNACT1   | SM     |      |    |            |     |                             |                               |      |
| 36        | LDB2         | SM     |      | X  | X          |     |                             |                               |      |
| 36        | CCDC68       | SM     |      |    |            |     |                             |                               |      |
| 36        | PDE2A        | SM     |      |    |            |     |                             |                               |      |
| 36        | MX1          | SM     |      |    |            |     |                             |                               |      |
| 36        | GPR56        | SM     |      |    |            |     |                             |                               |      |
| 36        | FLT1         | SM     |      |    | X          |     |                             |                               |      |
| 36        | SULF2        | SM     |      |    |            |     |                             |                               |      |
| 36        | EDNRA        | SM     |      |    |            | X   |                             |                               |      |
| 36        | FLI1         | SM     |      | X  | X          |     |                             |                               |      |
| 36        | EDN1         | SM     |      |    |            | X   |                             |                               |      |
| 36        | PPP1R16B     | SM     |      |    |            |     |                             |                               |      |
| 36        | ARHGDI8      | SM     |      |    |            |     |                             |                               |      |
| 36        | TM4SF18      | SM     |      |    |            |     |                             |                               |      |
| 36        | TNFSF10      | SM     |      |    |            |     |                             |                               |      |
| 36        | ADCY4        | SM     |      |    |            |     |                             |                               |      |
| 36        | S1PR1        | SM     |      |    |            |     |                             |                               |      |
| 36        | ATP1B2       | SM     |      |    |            |     |                             |                               |      |
| 36        | CDH5         | SM     |      |    |            |     |                             |                               |      |
| 36        | GJA4         | SM     |      |    |            |     |                             |                               |      |
| 36        | HLA-DMB      | SM     |      |    |            |     |                             |                               |      |
| 36        | ID3          | SM     |      | X  |            |     |                             |                               |      |
| 36        | KCNA5        | SM     |      |    |            |     |                             |                               |      |
| 36        | KDR          | SM     |      |    |            |     |                             |                               |      |
| 36        | HHEX         | SM     |      | X  |            |     |                             |                               |      |
| 36        | PTPRN2       | SM     |      |    |            |     |                             |                               |      |
| 36        | CX3CL1       | SM     |      |    |            |     |                             |                               |      |
| 36        | TAL1         | SM     |      | X  | X          |     |                             |                               | X    |
| 36        | IFTM1        | SM     |      |    |            |     |                             |                               |      |
| 36        | CAS          | SM     |      |    |            |     |                             |                               |      |
| 36        | SLC1A1       | SM     |      |    |            |     |                             |                               |      |
| 36        | UBE2L6       | SM     |      |    |            |     |                             |                               |      |
| 36        | TGM2         | SM     |      |    |            |     |                             |                               |      |
| 36        | KCNJ8        | SM     |      |    |            |     |                             |                               |      |
| 36        | ANXA3        | SM     |      |    |            |     |                             |                               |      |
| 36        | APLN         | SM     |      |    |            |     |                             |                               |      |
| 36        | ELK3         | SM     |      | X  |            |     |                             |                               |      |
| 36        | GJA5         | SM     |      |    |            |     |                             |                               |      |
| 36        | TIE1         | SM     |      |    |            |     |                             |                               |      |
| 36        | VEGFC        | SM     |      |    |            |     |                             |                               |      |
| 36        | MALL         | SM     |      |    |            |     |                             |                               |      |
| 36        | HLA-B        | SM     |      |    |            |     |                             |                               |      |
| 36        | HLA-E        | SM     |      |    |            |     |                             |                               |      |

| 36        | TSPAN2      | SM     |      |    |            |     |                             |                               |      |
|-----------|-------------|--------|------|----|------------|-----|-----------------------------|-------------------------------|------|
| 36        | RAMP2       | SM     |      |    |            |     |                             |                               |      |
| 36        | TBX2        | SM     |      | X  |            | X   |                             |                               |      |
| 36        | HLA-DMA     | SM     |      |    |            |     |                             |                               |      |
| 36        | OAS3        | SM     |      |    |            |     |                             |                               |      |
| 36        | TUSC3       | SM     |      |    |            |     |                             |                               |      |
| 36        | PDIAS       | SM     |      |    |            |     |                             |                               |      |
| 36        | IFI44L      | SM     |      |    |            |     |                             |                               |      |
| 36        | BTN3A3      | SM     |      |    |            |     |                             |                               |      |
| 36        | RAPGEF5     | SM     |      |    |            |     |                             |                               |      |
| 36        | PITPNC1     | SM     |      |    |            |     |                             |                               |      |
| 36        | TM4SF1      | SM     |      |    |            |     |                             |                               |      |
| 36        | GIMAP2      | SM     |      |    |            |     |                             |                               |      |
| 36        | SLCO4A1     | SM     |      |    |            |     |                             |                               |      |
| 36        | HIGD1B      | SM     |      |    |            |     |                             |                               |      |
| 36        | CLEC1A      | SM     |      |    |            |     |                             |                               |      |
| 36        | PCDH12      | SM     |      |    |            |     |                             |                               |      |
| 36        | NRN1        | SM     | X    |    |            |     |                             |                               |      |
| 36        | RASIP1      | SM     |      |    |            |     |                             |                               |      |
| 36        | MANSC1      | SM     |      |    |            |     |                             |                               |      |
| 36        | GIMAP4      | SM     |      |    |            |     |                             |                               |      |
| 36        | ROBO4       | SM     |      |    |            |     |                             |                               |      |
| 36        | C8orf14     | SM     |      |    |            |     |                             |                               |      |
| 36        | SEMA3G      | SM     |      |    |            |     |                             |                               |      |
| 36        | SHRQOM4     | SM     |      |    |            |     |                             |                               |      |
| 36        | ARHGAP31    | SM     |      |    |            |     |                             |                               |      |
| 36        | JAM2        | SM     |      |    |            |     |                             |                               |      |
| 36        | C6orf115    | SM     |      |    |            |     |                             |                               |      |
| 36        | SOX17       | SM     |      | X  |            |     |                             | X                             |      |
| 36        | C4orf31     | SM     |      |    |            |     |                             |                               |      |
| 36        | TMEM204     | SM     |      |    |            |     |                             |                               |      |
| 36        | Cxorf36     | SM     |      |    |            |     |                             |                               |      |
| 36        | GIMAP6      | SM     |      |    |            |     |                             |                               |      |
| 36        | ARHGEF15    | SM     |      |    |            |     |                             |                               |      |
| 36        | MYCT1       | SM     |      |    |            |     |                             |                               |      |
| 36        | LBI         | SM     |      |    |            |     |                             |                               |      |
| 36        | PLVAP       | SM     |      |    |            |     |                             |                               |      |
| 36        | SQX7        | SM     |      | X  |            |     |                             |                               |      |
| 36        | SEMA6B      | SM     |      |    |            |     |                             |                               |      |
| 36        | HLA-DPA1    | SM     |      |    |            |     |                             |                               |      |
| 36        | CYR1        | SM     |      |    |            |     |                             |                               |      |
| 36        | RBP7        | SM     |      |    |            |     |                             |                               |      |
| 36        | C20orf160   | SM     |      |    |            |     |                             |                               |      |
| 36        | GIMAP1      | SM     |      |    |            |     |                             |                               |      |
| 36        | TSPAN18     | SM     |      |    |            |     |                             |                               |      |
| 36        | ESAM        | SM     |      |    |            |     |                             |                               |      |
| 36        | EHD4        | SM     |      |    |            |     |                             |                               |      |
| 36        | GJD3        | SM     |      |    |            |     |                             |                               |      |
| 36        | BTNL9       | SM     |      |    |            |     |                             |                               |      |
| 36        | GIMAP7      | SM     |      |    |            |     |                             |                               |      |
| 36        | PLEKH7      | SM     |      |    |            |     |                             |                               |      |
| 36        | GIMAP8      | SM     |      |    |            |     |                             |                               |      |
| 36        | GPIHBP1     | SM     |      |    |            |     |                             |                               |      |
| 36        | C1QTNF9     | SM     |      |    |            |     |                             |                               |      |
| 36        | CMTM8       | SM     |      |    |            |     |                             |                               |      |
| 36        | ITGA1       | SM     |      | X  |            |     |                             |                               |      |
| 36        | BCL6B       | SM     |      |    |            |     |                             |                               |      |
| 36        | TMEM88      | SM     |      |    |            |     |                             |                               |      |
| 36        | GPR160      | VF     |      |    |            |     |                             |                               |      |
| 36        | CD163L1     | VF     |      |    |            |     |                             |                               |      |
| 36        | SNORD18C    | VF     |      |    |            |     |                             |                               |      |
| Module ID | Gene Symbol | Tissue | eQTL | TF | Key Driver | CAD | Candidate gene in GWAS for: |                               |      |
|           |             |        |      |    |            |     | Plasma glucose metabolism   | Plasma cholesterol metabolism | T2DM |
| 37        | APOE        | AAW    |      |    |            | X   |                             | X                             |      |
| 37        | GK          | AAW    |      |    |            |     |                             |                               |      |
| 37        | MYO5A       | AAW    |      |    |            |     |                             |                               |      |
| 37        | MYO7A       | AAW    |      |    |            |     |                             |                               |      |
| 37        | SOD2        | AAW    |      |    |            |     |                             |                               |      |
| 37        | ADORA3      | AAW    |      |    |            |     |                             |                               |      |
| 37        | ALDH3B1     | AAW    |      |    |            |     |                             |                               |      |
| 37        | ITGA4       | AAW    |      |    |            |     |                             |                               |      |
| 37        | UBASH3A     | AAW    |      |    |            |     |                             |                               |      |
| 37        | SYTL3       | AAW    |      |    |            |     |                             |                               |      |
| 37        | LSP1        | AAW    |      |    |            |     |                             |                               |      |
| 37        | FAM96A      | AAW    |      |    |            |     |                             |                               |      |
| 37        | SFMBT2      | AAW    |      |    |            |     |                             |                               |      |
| 37        | PDE8B       | AAW    |      | X  | X          |     |                             |                               |      |
| 37        | OBFC2A      | AAW    |      |    |            |     |                             |                               |      |
| 37        | SPINT1      | AAW    |      |    |            |     |                             |                               |      |
| 37        | ALOX15B     | AAW    |      |    |            |     |                             |                               |      |
| 37        | SIRPG       | AAW    |      |    |            |     |                             |                               |      |
| 37        | IL18BP      | AAW    |      |    |            |     |                             |                               |      |

| 37        | NLRP3       | AAW    |      |    |            |                             |                           |                               |      |  |  |
|-----------|-------------|--------|------|----|------------|-----------------------------|---------------------------|-------------------------------|------|--|--|
| 37        | VAV3        | AAW    |      |    |            |                             |                           |                               |      |  |  |
| 37        | CCDC88C     | AAW    |      |    |            |                             |                           |                               |      |  |  |
| 37        | C2orf89     | AAW    |      |    |            |                             |                           |                               |      |  |  |
| 37        | LILRB5      | AAW    |      |    |            |                             |                           |                               |      |  |  |
| 37        | LILRB3      | AAW    |      |    |            |                             |                           |                               |      |  |  |
| 37        | SCARB1      | AAW    |      |    |            |                             |                           |                               | X    |  |  |
| 37        | GPR34       | AAW    |      |    |            |                             |                           |                               |      |  |  |
| 37        | KIAA0748    | AAW    |      |    |            |                             |                           |                               |      |  |  |
| 37        | LYN         | AAW    |      |    |            |                             |                           |                               |      |  |  |
| 37        | BLNK        | AAW    |      |    |            |                             |                           |                               |      |  |  |
| 37        | SH2D1A      | AAW    |      |    |            |                             |                           |                               |      |  |  |
| 37        | PLIN2       | AAW    |      |    |            |                             |                           |                               |      |  |  |
| 37        | SLC6A12     | AAW    |      |    |            |                             |                           |                               |      |  |  |
| 37        | NR1H3       | AAW    | X    |    | X          |                             |                           |                               | X    |  |  |
| 37        | ZNF385A     | AAW    |      |    |            |                             |                           |                               |      |  |  |
| 37        | ZMYND15     | AAW    |      |    |            |                             |                           |                               |      |  |  |
| 37        | SGK1        | AAW    |      |    |            |                             |                           |                               |      |  |  |
| 37        | C6orf105    | AAW    |      |    |            |                             |                           |                               |      |  |  |
| 37        | ADAMDEC1    | AAW    |      |    |            |                             |                           |                               |      |  |  |
| 37        | TNFSF13B    | AAW    |      |    |            |                             |                           |                               |      |  |  |
| 37        | NCEH1       | AAW    |      |    |            |                             |                           |                               |      |  |  |
| 37        | ANPEP       | AAW    |      |    |            |                             |                           |                               |      |  |  |
| 37        | PRRS1       | AAW    |      |    |            |                             |                           |                               |      |  |  |
| 37        | LST1        | AAW    |      |    |            |                             |                           |                               |      |  |  |
| 37        | SLC1A3      | AAW    |      |    |            |                             |                           |                               |      |  |  |
| 37        | GPR68       | AAW    |      |    |            |                             |                           |                               |      |  |  |
| 37        | DOCK8       | AAW    |      |    |            |                             |                           |                               |      |  |  |
| 37        | PTPN22      | AAW    |      |    |            |                             |                           |                               |      |  |  |
| 37        | RAB42       | AAW    |      |    |            |                             |                           |                               |      |  |  |
| 37        | LY96        | AAW    |      |    |            |                             |                           |                               |      |  |  |
| 37        | CTSS        | AAW    |      |    |            |                             |                           |                               |      |  |  |
| 37        | SNX10       | AAW    |      |    |            |                             |                           |                               |      |  |  |
| 37        | CASP1       | AAW    |      |    |            |                             |                           |                               |      |  |  |
| 37        | CH1L1       | AAW    |      |    |            |                             |                           |                               |      |  |  |
| 37        | FIB         | AAW    |      |    |            |                             |                           |                               |      |  |  |
| 37        | ALOX5AP     | AAW    |      |    |            |                             |                           |                               |      |  |  |
| 37        | CCR7        | AAW    |      |    |            |                             |                           |                               |      |  |  |
| 37        | EMR1        | AAW    |      |    |            |                             |                           |                               |      |  |  |
| 37        | GZMK        | AAW    |      |    |            |                             |                           |                               |      |  |  |
| 37        | MMP12       | AAW    |      |    |            |                             |                           |                               |      |  |  |
| 37        | P2RX7       | AAW    |      |    |            |                             |                           |                               |      |  |  |
| 37        | PIK3CG      | AAW    |      |    |            |                             |                           |                               |      |  |  |
| 37        | PTPRC       | AAW    |      |    |            |                             |                           |                               |      |  |  |
| 37        | SELPLG      | AAW    |      |    |            |                             |                           |                               |      |  |  |
| 37        | SLAMF1      | AAW    |      |    |            |                             |                           |                               |      |  |  |
| 37        | TIAM1       | AAW    |      |    |            |                             |                           |                               |      |  |  |
| 37        | TLR2        | AAW    |      |    |            |                             |                           |                               |      |  |  |
| 37        | KMO         | AAW    |      |    |            |                             |                           |                               |      |  |  |
| 37        | SKAP2       | AAW    |      |    |            |                             |                           |                               |      |  |  |
| 37        | E2F2        | AAW    | X    |    | X          |                             |                           |                               |      |  |  |
| 37        | CYTIP       | AAW    |      |    |            |                             |                           |                               |      |  |  |
| 37        | PLCB2       | AAW    |      |    |            |                             |                           |                               |      |  |  |
| 37        | AIM2        | AAW    |      |    |            |                             |                           |                               |      |  |  |
| 37        | IL27RA      | AAW    |      |    |            |                             |                           |                               |      |  |  |
| 37        | CLEC2B      | AAW    |      |    |            |                             |                           |                               |      |  |  |
| 37        | CD80        | AAW    | X    |    | X          |                             |                           |                               |      |  |  |
| 37        | CSTA        | AAW    |      |    |            |                             |                           |                               |      |  |  |
| 37        | HCLS1       | AAW    | X    |    | X          |                             |                           |                               |      |  |  |
| 37        | PLXNC1      | AAW    |      |    |            |                             |                           |                               |      |  |  |
| 37        | KLRG1       | AAW    |      |    |            |                             |                           |                               |      |  |  |
| 37        | FMNL1       | AAW    |      |    |            |                             |                           |                               |      |  |  |
| 37        | GZMA        | AAW    |      |    |            |                             |                           |                               |      |  |  |
| 37        | LRMP        | AAW    |      |    |            |                             |                           |                               |      |  |  |
| 37        | TNFAIP2     | AAW    |      |    |            |                             |                           |                               |      |  |  |
| Module ID | Gene Symbol | Tissue | eQTL | TF | Key Driver | Candidate gene in GWAS for: |                           |                               |      |  |  |
|           |             |        |      |    |            | CAD                         | Plasma glucose metabolism | Plasma cholesterol metabolism | T2DM |  |  |
| 37        | EV12B       | AAW    |      |    |            |                             |                           |                               |      |  |  |
| 37        | CXCR6       | AAW    |      |    |            |                             |                           |                               |      |  |  |
| 37        | IQGAP2      | AAW    |      |    |            |                             |                           |                               |      |  |  |
| 37        | DUSP10      | AAW    |      |    |            |                             |                           |                               |      |  |  |
| 37        | EPB41L3     | AAW    |      |    |            |                             |                           |                               |      |  |  |
| 37        | MYO1F       | AAW    |      |    |            |                             |                           |                               |      |  |  |
| 37        | EMR2        | AAW    |      |    |            |                             |                           |                               |      |  |  |
| 37        | CD5         | AAW    |      |    |            |                             |                           |                               |      |  |  |
| 37        | DAPP1       | AAW    |      |    |            |                             |                           |                               |      |  |  |
| 37        | TNFRSF21    | AAW    |      |    |            |                             |                           |                               |      |  |  |
| 37        | MTSS1       | AAW    |      |    |            |                             |                           |                               |      |  |  |
| 37        | STAB1       | AAW    |      |    |            |                             |                           |                               |      |  |  |
| 37        | OSBP13      | AAW    |      |    |            |                             |                           |                               | X    |  |  |
| 37        | GIMAP2      | AAW    |      |    |            |                             |                           |                               |      |  |  |
| 37        | PKD2L1      | AAW    |      |    |            |                             |                           |                               |      |  |  |

| 37        | F11R         | AAW    |      |    |            |     |                             |                               |      |  |
|-----------|--------------|--------|------|----|------------|-----|-----------------------------|-------------------------------|------|--|
| 37        | KIF21B       | AAW    |      |    |            |     |                             |                               |      |  |
| 37        | MREG         | AAW    |      |    |            |     |                             |                               |      |  |
| 37        | NETO2        | AAW    |      |    |            |     |                             |                               |      |  |
| 37        | PAG1         | AAW    |      |    |            |     |                             |                               |      |  |
| 37        | GPR84        | AAW    |      |    |            |     |                             |                               |      |  |
| 37        | MS4A7        | AAW    |      |    |            |     |                             |                               |      |  |
| 37        | DNASE2B      | AAW    |      |    |            |     |                             |                               |      |  |
| 37        | KCNK13       | AAW    |      |    |            |     |                             |                               |      |  |
| 37        | SAMSN1       | AAW    |      |    |            |     |                             |                               |      |  |
| 37        | CLEC7A       | AAW    |      |    |            |     |                             |                               |      |  |
| 37        | PVRIG        | AAW    |      |    |            |     |                             |                               |      |  |
| 37        | LILRA6       | AAW    |      |    |            |     |                             |                               |      |  |
| 37        | ATP8B4       | AAW    |      |    |            |     |                             |                               |      |  |
| 37        | NUP210       | AAW    |      |    |            |     |                             |                               |      |  |
| 37        | C13orf18     | AAW    |      |    |            |     |                             |                               |      |  |
| 37        | CXorf21      | AAW    |      |    |            |     |                             |                               |      |  |
| 37        | TMEM163      | AAW    |      |    |            |     |                             |                               |      |  |
| 37        | NUAK2        | AAW    |      |    |            |     |                             |                               |      |  |
| 37        | SLA2         | AAW    |      |    |            |     |                             |                               |      |  |
| 37        | C15orf48     | AAW    |      |    |            |     |                             |                               |      |  |
| 37        | TAGAP        | AAW    |      |    |            |     |                             |                               |      |  |
| 37        | TM4SF19      | AAW    |      |    |            |     |                             |                               |      |  |
| 37        | ANKRD22      | AAW    |      |    |            |     |                             |                               |      |  |
| 37        | ATP5V0D2     | AAW    |      |    |            |     |                             |                               |      |  |
| 37        | C12orf59     | AAW    |      |    |            |     |                             |                               |      |  |
| 37        | HTRA4        | AAW    |      |    |            |     |                             |                               |      |  |
| 37        | TMEM26       | AAW    |      |    |            |     |                             |                               |      |  |
| 37        | RASSF5       | AAW    |      |    |            |     |                             |                               |      |  |
| 37        | GPRIN3       | AAW    |      |    |            |     |                             |                               |      |  |
| 37        | LOC284837    | AAW    |      |    |            |     |                             |                               |      |  |
| 37        | LOC100507463 | AAW    |      |    |            |     |                             |                               |      |  |
| Module ID | Gene Symbol  | Tissue | eQTL | TF | Key Driver | CAD | Candidate gene in GWAS for: |                               | T2DM |  |
|           |              |        |      |    |            |     | Plasma glucose metabolism   | Plasma cholesterol metabolism |      |  |
| 38        | OCA2         | AAW    |      |    |            |     |                             |                               |      |  |
| 38        | SGCD         | AAW    | X    |    | X          |     |                             |                               |      |  |
| 38        | IL10         | AAW    |      |    |            |     |                             |                               |      |  |
| 38        | GLRB         | AAW    |      |    |            |     |                             |                               |      |  |
| 38        | TARP         | AAW    |      |    |            |     |                             |                               |      |  |
| 38        | LDB3         | AAW    |      |    |            |     |                             |                               |      |  |
| 38        | SIRPB1       | AAW    | X    |    | X          |     |                             |                               |      |  |
| 38        | SEPP1        | AAW    |      |    |            |     |                             |                               |      |  |
| 38        | FAM54A       | AAW    |      |    |            |     |                             |                               |      |  |
| 38        | ROBO2        | AAW    |      |    |            |     |                             |                               |      |  |
| 38        | DYSF         | AAW    |      |    |            |     |                             |                               |      |  |
| 38        | C18orf38     | AAW    |      |    |            |     |                             |                               |      |  |
| 38        | MFSO2A       | AAW    |      |    |            |     |                             |                               |      |  |
| 38        | SERPINE2     | AAW    |      |    |            |     |                             |                               |      |  |
| 38        | MYOCD        | AAW    |      | X  | X          |     |                             |                               |      |  |
| 38        | C8orf34      | AAW    |      |    |            |     |                             |                               |      |  |
| 38        | LTF          | AAW    |      |    |            |     |                             |                               |      |  |
| 38        | BTC          | AAW    |      |    |            |     |                             |                               |      |  |
| 38        | CD69         | AAW    |      |    |            |     |                             |                               |      |  |
| 38        | COL15A1      | AAW    |      |    |            |     |                             |                               |      |  |
| 38        | KCNN4        | AAW    |      |    |            |     |                             |                               |      |  |
| 38        | KPNA2        | AAW    |      |    |            |     |                             |                               |      |  |
| 38        | FTN          | AAW    |      |    |            |     |                             |                               |      |  |
| 38        | GRAP2        | AAW    |      |    |            |     |                             |                               |      |  |
| 38        | IRX5         | AAW    |      | X  | X          |     |                             |                               |      |  |
| 38        | UBD          | AAW    |      |    |            |     |                             |                               |      |  |
| 38        | GNLY         | AAW    |      |    |            |     |                             |                               |      |  |
| 38        | STEAP1       | AAW    |      |    |            |     |                             |                               |      |  |
| 38        | CLEC5A       | AAW    |      |    |            |     |                             |                               |      |  |
| 38        | DTX4         | AAW    |      |    |            |     |                             |                               |      |  |
| 38        | ARHGAP15     | AAW    |      |    |            |     |                             |                               |      |  |
| 38        | PMALP1       | AAW    |      |    |            |     |                             |                               |      |  |
| 38        | NOD2         | AAW    |      |    |            |     |                             |                               |      |  |
| 38        | NTNG2        | AAW    |      |    |            |     |                             |                               |      |  |
| 38        | MYO18B       | AAW    |      |    |            |     |                             |                               |      |  |
| 38        | METTL7B      | AAW    |      |    |            |     |                             |                               |      |  |
| 38        | RALGPS2      | AAW    |      |    |            |     |                             |                               |      |  |
| 38        | SCUBE3       | AAW    |      |    |            |     |                             |                               |      |  |
| 38        | SEMA3D       | AAW    |      |    |            |     |                             |                               |      |  |
| 38        | FAM19A2      | AAW    |      |    |            |     |                             |                               |      |  |
| 38        | SLC24A5      | AAW    |      |    |            |     |                             |                               |      |  |
| 38        | NCKAP5       | AAW    |      |    |            |     |                             |                               |      |  |
| 38        | HK2          | IMA    |      |    |            |     |                             |                               |      |  |
| 38        | GUCY1A2      | IMA    |      |    |            |     |                             |                               |      |  |
| 38        | MIRO         | IMA    |      |    |            |     |                             |                               |      |  |
| 38        | CDH17        | IMA    |      |    |            |     |                             |                               |      |  |
| 38        | MYO16        | IMA    |      |    |            |     |                             |                               |      |  |
| 38        | IL12RB2      | IMA    |      |    |            |     |                             |                               |      |  |

| 38        | LY75        | IMA    | X    |    |            |                             |                           |                               |      |  |
|-----------|-------------|--------|------|----|------------|-----------------------------|---------------------------|-------------------------------|------|--|
| 38        | TYRO3       | IMA    |      |    |            |                             |                           |                               |      |  |
| 38        | AND3        | IMA    | X    |    |            |                             |                           |                               |      |  |
| 38        | CCDC122     | IMA    |      |    |            |                             |                           |                               |      |  |
| 38        | ATP6VOD2    | IMA    |      |    |            |                             |                           |                               |      |  |
| 38        | SNORD46     | IMA    |      |    |            |                             |                           |                               |      |  |
| 38        | SNORD58A    | IMA    | X    |    |            |                             |                           |                               |      |  |
| 38        | LOC646903   | IMA    |      |    |            |                             |                           |                               |      |  |
| 38        | SLC11A1     | Liver  |      | X  |            |                             |                           |                               |      |  |
| 38        | SREBF1      | Liver  | X    |    |            |                             |                           |                               |      |  |
| 38        | ZWINT       | Liver  |      |    |            |                             |                           |                               |      |  |
| 38        | MAD1L1      | Liver  |      |    |            |                             |                           |                               |      |  |
| 38        | KIAA0101    | Liver  |      |    |            |                             |                           |                               |      |  |
| 38        | RRM2        | Liver  |      |    |            |                             |                           |                               |      |  |
| 38        | SKA1        | Liver  |      |    |            |                             |                           |                               |      |  |
| 38        | CENPA       | Liver  |      |    |            |                             |                           |                               |      |  |
| 38        | TOP2A       | Liver  |      |    |            |                             |                           |                               |      |  |
| 38        | CEP55       | Liver  |      |    |            |                             |                           |                               |      |  |
| 38        | NUSAP1      | Liver  |      |    |            |                             |                           |                               |      |  |
| 38        | CDKN3       | Liver  |      |    |            |                             |                           |                               |      |  |
| 38        | RAD51AP1    | Liver  |      |    |            |                             |                           |                               |      |  |
| 38        | HMMR        | Liver  |      |    |            |                             |                           |                               |      |  |
| 38        | FAM111B     | Liver  | X    |    | X          |                             |                           |                               |      |  |
| 38        | DGAP5       | Liver  |      |    |            |                             |                           |                               |      |  |
| 38        | TKT         | Liver  |      |    |            |                             |                           |                               |      |  |
| 38        | CDK1        | Liver  |      |    |            |                             |                           |                               |      |  |
| 38        | CCNA2       | Liver  |      |    |            |                             |                           |                               |      |  |
| 38        | TNC         | Liver  | X    |    |            |                             |                           |                               |      |  |
| 38        | MAD2L1      | Liver  |      |    |            |                             |                           |                               |      |  |
| 38        | NEK2        | Liver  |      |    |            |                             |                           |                               |      |  |
| 38        | PRC1        | Liver  |      |    |            |                             |                           |                               | X    |  |
| 38        | PTTG1       | Liver  |      | X  | X          |                             |                           |                               |      |  |
| 38        | CCNB2       | Liver  |      |    |            |                             |                           |                               |      |  |
| 38        | KIF20A      | Liver  |      |    |            |                             |                           |                               |      |  |
| 38        | NDC80       | Liver  | X    |    |            |                             |                           |                               |      |  |
| 38        | UBE2C       | Liver  |      |    |            |                             |                           |                               |      |  |
| 38        | GUCY2B      | Liver  |      |    |            |                             |                           |                               |      |  |
| 38        | UBE2T       | Liver  |      |    |            |                             |                           |                               |      |  |
| 38        | ECT2        | Liver  |      |    |            |                             |                           |                               |      |  |
| 38        | CDC48       | Liver  |      |    |            |                             |                           |                               |      |  |
| 38        | PBK         | Liver  |      |    |            |                             |                           |                               |      |  |
| 38        | NCAPG       | Liver  |      |    |            |                             |                           |                               |      |  |
| 38        | CDC43       | Liver  |      |    |            |                             |                           |                               |      |  |
| 38        | MND1        | Liver  |      |    |            |                             |                           |                               |      |  |
| 38        | RDH12       | Liver  |      |    |            |                             |                           |                               |      |  |
| 38        | DKK3        | Blood  | X    |    |            |                             |                           |                               |      |  |
| 38        | IL3RA       | Blood  |      |    |            |                             |                           |                               |      |  |
| 38        | TAGLN       | SM     | X    |    |            |                             |                           |                               |      |  |
| 38        | UGT2B17     | SM     | X    |    |            |                             |                           |                               |      |  |
| 38        | CMA1        | SM     |      |    |            |                             |                           |                               | X    |  |
| 38        | OLFM1       | SM     |      |    |            |                             |                           |                               |      |  |
| 38        | CHL1        | SM     |      |    |            |                             |                           |                               |      |  |
| 38        | RHCE        | SM     | X    |    |            |                             |                           |                               |      |  |
| 38        | OAF         | SM     |      |    |            |                             |                           |                               |      |  |
| 38        | ALOX15      | SF     |      |    |            |                             |                           |                               |      |  |
| 38        | PDZK1IP1    | SF     |      |    |            |                             |                           |                               |      |  |
| 38        | SGIP1       | SF     |      |    |            |                             |                           |                               |      |  |
| 38        | MAL2        | SF     | X    |    |            |                             |                           |                               |      |  |
| 38        | PRR15       | SF     |      |    |            |                             |                           |                               |      |  |
| 38        | LOC730102   | SF     |      |    |            |                             |                           |                               |      |  |
| 38        | RNFT2       | VF     |      |    |            |                             |                           |                               |      |  |
| 38        | ESM1        | VF     |      |    |            |                             |                           |                               |      |  |
| 38        | KIAA1239    | VF     |      |    |            |                             |                           |                               |      |  |
| 38        | ANKRD34C    | VF     |      |    |            |                             |                           |                               |      |  |
| 38        | SCEL        | VF     |      |    |            |                             |                           |                               |      |  |
| 38        | CX3CR1      | VF     |      |    |            |                             |                           |                               |      |  |
| 38        | SCN11A      | VF     |      |    |            |                             |                           |                               |      |  |
| 38        | ID2-AS1     | VF     |      |    |            |                             |                           |                               |      |  |
| 38        | LOC145663   | VF     |      |    |            |                             |                           |                               |      |  |
| Module ID | Gene Symbol | Tissue | eQTL | TF | Key Driver | Candidate gene in GWAS for: |                           |                               |      |  |
|           |             |        |      |    |            | CAD                         | Plasma glucose metabolism | Plasma cholesterol metabolism | T2DM |  |
| 41        | RPRG        | IMA    |      |    |            |                             |                           |                               |      |  |
| 41        | APRT        | IMA    |      |    |            |                             |                           |                               |      |  |
| 41        | PMS1        | IMA    |      |    |            |                             |                           |                               |      |  |
| 41        | ZNF429      | IMA    |      |    |            |                             |                           |                               |      |  |
| 41        | TRIM34      | IMA    |      |    |            |                             |                           |                               |      |  |
| 41        | ALG3        | IMA    |      |    |            |                             |                           |                               |      |  |
| 41        | KLHL5       | IMA    |      |    |            |                             |                           |                               |      |  |
| 41        | ZNF152      | IMA    |      |    |            |                             |                           |                               |      |  |
| 41        | ZNF37A      | IMA    |      | X  | X          |                             |                           |                               |      |  |
| 41        | TDRD6       | IMA    |      |    |            |                             |                           |                               |      |  |
| 41        | ZMAT1       | IMA    |      |    |            |                             |                           |                               |      |  |

|            |     |   |   |  |  |  |
|------------|-----|---|---|--|--|--|
| 41 CCDC66  | IMA |   |   |  |  |  |
| 41 ZNF793  | IMA |   |   |  |  |  |
| 41 C5orf56 | IMA |   |   |  |  |  |
| 41 ZNF107  | IMA |   |   |  |  |  |
| 41 PQBP1   | IMA | X |   |  |  |  |
| 41 DCLRE1C | IMA |   |   |  |  |  |
| 41 CCDC46  | IMA |   |   |  |  |  |
| 41 MAP9    | IMA |   |   |  |  |  |
| 41 C7orf63 | IMA |   |   |  |  |  |
| 41 CCDC41  | IMA |   |   |  |  |  |
| 41 ZNF596  | IMA |   |   |  |  |  |
| 41 ZNF493  | IMA |   |   |  |  |  |
| 41 ZNF682  | IMA |   |   |  |  |  |
| 41 MS4A14  | IMA |   |   |  |  |  |
| 41 CCDC30  | IMA |   |   |  |  |  |
| 41 ZNF83   | IMA | X | X |  |  |  |
| 41 ZNF195  | IMA |   |   |  |  |  |
| 41 NDE1    | IMA |   |   |  |  |  |
| 41 LDHAL6A | IMA |   |   |  |  |  |
| 41 ZNF234  | IMA | X |   |  |  |  |
| 41 ZNF737  | IMA |   |   |  |  |  |
| 41 ZNF138  | IMA | X | X |  |  |  |
| 41 C1orf27 | IMA |   |   |  |  |  |
| 41 ANKRD36 | IMA |   |   |  |  |  |
| 41 ZNF540  | IMA |   |   |  |  |  |
| 41 NEXN    | IMA |   |   |  |  |  |
| 41 ZNF573  | IMA |   |   |  |  |  |
| 41 GOLGA4  | IMA |   |   |  |  |  |
| 41 SLC16A6 | IMA |   |   |  |  |  |
| 41 IFT80   | IMA |   |   |  |  |  |
| 41 CEP152  | IMA |   |   |  |  |  |
| 41 DHFRL1  | IMA |   |   |  |  |  |
| 41 TBCB    | IMA |   |   |  |  |  |
| 41 CYC1    | IMA |   |   |  |  |  |
| 41 PNN     | IMA |   |   |  |  |  |
| 41 SNRPB   | IMA |   |   |  |  |  |
| 41 ZNF91   | IMA | X |   |  |  |  |
| 41 TRIP11  | IMA | X | X |  |  |  |
| 41 NAIP    | IMA |   |   |  |  |  |

|              |     |   |   |  |
|--------------|-----|---|---|--|
| 41 SMC3      | IMA |   |   |  |
| 41 RAD50     | IMA |   |   |  |
| 41 MPHOSPH10 | IMA |   |   |  |
| 41 TUBB2C    | IMA |   |   |  |
| 41 PCM1      | IMA |   |   |  |
| 41 PIBF1     | IMA |   |   |  |
| 41 STARD10   | IMA |   |   |  |
| 41 DIAPH2    | IMA |   |   |  |
| 41 CEP110    | IMA |   |   |  |
| 41 ZNF92     | IMA | X |   |  |
| 41 SYCP2     | IMA |   |   |  |
| 41 KIAA1009  | IMA |   |   |  |
| 41 ANKRD26   | IMA |   |   |  |
| 41 ZC3H13    | IMA |   |   |  |
| 41 LARP7     | IMA |   |   |  |
| 41 SFRS18    | IMA |   |   |  |
| 41 ZNF117    | IMA | X |   |  |
| 41 ZNF593    | IMA | X |   |  |
| 41 EIF5B     | IMA |   |   |  |
| 41 ESF1      | IMA |   |   |  |
| 41 MPHOSPH8  | IMA |   |   |  |
| 41 XAF1      | IMA |   |   |  |
| 41 C10orf118 | IMA |   |   |  |
| 41 C12orf35  | IMA |   |   |  |
| 41 CCAR1     | IMA |   |   |  |
| 41 C14orf106 | IMA |   |   |  |
| 41 ETAA1     | IMA |   |   |  |
| 41 KIAA1377  | IMA |   |   |  |
| 41 ZNF471    | IMA | X |   |  |
| 41 ZFP14     | IMA |   |   |  |
| 41 CWC22     | IMA |   |   |  |
| 41 NDUFS7    | IMA |   |   |  |
| 41 ATAD5     | IMA |   |   |  |
| 41 SPEF2     | IMA |   |   |  |
| 41 CEP135    | IMA |   |   |  |
| 41 HMG5      | IMA | X |   |  |
| 41 CCDC55    | IMA | X | X |  |
| 41 C5orf32   | IMA |   |   |  |
| 41 ZNF594    | IMA |   |   |  |
| 41 C3orf15   | IMA |   |   |  |

41 LRRCC1 IMA  
41 ZNF354B IMA  
41 CDKN2AIPNL IMA

All\_modules



| 41        | ZNF721      | IMA    |      |    |            |     |                             |                               |      |
|-----------|-------------|--------|------|----|------------|-----|-----------------------------|-------------------------------|------|
| 41        | ZNF675      | IMA    |      | X  |            |     |                             |                               |      |
| 41        | C13orf22    | IMA    |      |    |            |     |                             |                               |      |
| 41        | ZNF441      | IMA    |      |    |            |     |                             |                               |      |
| 41        | ZNF785      | IMA    |      |    |            |     |                             |                               |      |
| 41        | ZNF781      | IMA    |      |    |            |     |                             |                               |      |
| 41        | KLHDC1      | IMA    |      |    |            |     |                             |                               |      |
| 41        | C9orf93     | IMA    |      |    |            |     |                             |                               |      |
| 41        | GCC2        | IMA    |      |    |            |     |                             |                               |      |
| 41        | ZNF600      | IMA    |      |    |            |     |                             |                               |      |
| 41        | RPL23AP32   | IMA    |      |    |            |     |                             |                               |      |
| 41        | ZNF204P     | IMA    |      |    |            |     |                             |                               |      |
| 41        | MCM3AP-AS1  | IMA    | X    |    |            |     |                             |                               |      |
| 41        | FAM13AQS    | IMA    |      |    |            |     |                             |                               |      |
| 41        | ZNF37BP     | IMA    |      |    |            |     |                             |                               |      |
| 41        | RPL21P44    | IMA    |      |    |            |     |                             |                               |      |
| 41        | LOC728640   | IMA    |      |    |            |     |                             |                               |      |
| 41        | RP1-177G6.2 | IMA    |      |    |            |     |                             |                               |      |
| 41        | MIR644      | IMA    |      |    |            |     |                             |                               |      |
| Module ID | Gene Symbol | Tissue | eQTL | TF | Key Driver | CAD | Candidate gene in GWAS for: |                               | T2DM |
|           |             |        |      |    |            |     | Plasma glucose metabolism   | Plasma cholesterol metabolism |      |
| 43        | GRP         | AAW    |      |    |            |     |                             |                               |      |
| 43        | SPHKAP      | AAW    |      |    |            |     |                             |                               |      |
| 43        | NELL2       | AAW    | X    |    |            |     |                             |                               |      |
| 43        | MPR13       | AAW    |      |    |            |     |                             |                               |      |
| 43        | SPINK2      | AAW    |      |    |            |     |                             |                               |      |
| 43        | GPR88       | AAW    |      |    |            |     |                             |                               |      |
| 43        | ARMC9       | AAW    | X    |    |            |     |                             |                               |      |
| 43        | KL8         | AAW    |      |    |            |     |                             |                               |      |
| 43        | LEP         | Liver  |      |    |            |     |                             |                               | X    |
| 43        | LPL         | Liver  |      |    |            | X   |                             | X                             |      |
| 43        | MYOC        | Liver  |      |    |            |     |                             |                               |      |
| 43        | ADIPOQ      | Liver  |      |    |            |     |                             |                               |      |
| 43        | MFAP5       | Liver  |      |    |            |     |                             |                               |      |
| 43        | NFY1R       | SM     |      |    |            |     |                             |                               |      |
| 43        | HMGCL11     | SM     |      |    |            |     |                             |                               |      |
| 43        | C7orf68     | SM     |      |    |            |     |                             |                               |      |
| 43        | F3          | SM     |      |    |            |     |                             |                               |      |
| 43        | CEP152      | SM     |      |    |            |     |                             |                               |      |
| 43        | AMPH        | SM     | X    |    |            |     |                             |                               |      |
| 43        | LY75        | SM     |      |    |            |     |                             |                               |      |
| 43        | RERGL       | SM     |      |    |            |     |                             |                               |      |
| 43        | AMPD1       | SF     |      |    |            |     |                             |                               |      |
| 43        | CACNA1S     | SF     |      |    |            |     |                             |                               |      |
| 43        | MYH7        | SF     |      |    |            |     |                             |                               |      |
| 43        | MYL3        | SF     |      |    |            |     |                             |                               |      |
| 43        | PGAM2       | SF     |      |    |            |     |                             |                               |      |
| 43        | MYL2        | SF     |      |    |            |     |                             | X                             |      |
| 43        | RYR1        | SF     |      |    |            |     |                             |                               |      |
| 43        | CACNG1      | SF     |      |    |            |     |                             |                               |      |
| 43        | C8orf22     | SF     |      |    |            |     |                             |                               |      |
| 43        | DUSP13      | SF     |      |    |            |     |                             |                               |      |
| 43        | MURC        | SF     |      |    |            |     |                             |                               |      |
| 43        | UNC45B      | SF     |      |    |            |     |                             |                               |      |
| 43        | C3orf43     | SF     |      |    |            |     |                             |                               |      |
| 43        | XIRP2       | SF     |      |    |            |     |                             |                               |      |
| 43        | DUSP27      | SF     |      |    |            |     |                             |                               |      |
| 43        | ACTA1       | SF     |      |    |            |     |                             |                               |      |
| 43        | MYH2        | SF     | X    |    | X          |     |                             |                               |      |
| 43        | ACTN2       | SF     |      | X  | X          |     |                             |                               |      |
| 43        | ACTN3       | SF     |      |    |            |     |                             |                               |      |
| 43        | DHRS7C      | SF     |      |    |            |     |                             |                               |      |
| 43        | SYNPO2L     | SF     |      |    |            |     |                             |                               |      |
| 43        | MYOZ3       | SF     |      |    |            |     |                             |                               |      |
| 43        | TNNT1       | SF     |      |    |            |     |                             |                               |      |
| 43        | CSRFP3      | SF     |      |    |            |     |                             |                               |      |
| 43        | ART3        | SF     |      |    |            |     |                             |                               |      |
| 43        | C10orf71    | SF     |      |    |            |     |                             |                               |      |
| 43        | TNNI2       | SF     |      |    |            |     |                             |                               |      |
| 43        | NEB         | SF     |      |    |            |     |                             |                               |      |
| 43        | PYGM        | SF     |      |    |            |     |                             |                               |      |
| 43        | EGF         | SF     |      |    |            |     |                             |                               |      |
| 43        | ENO3        | SF     |      |    |            |     |                             |                               |      |
| 43        | XIRP1       | SF     |      |    |            |     |                             |                               |      |
| 43        | CASQ1       | SF     |      |    |            |     |                             |                               |      |
| 43        | CAV3        | SF     |      |    |            |     |                             |                               |      |
| 43        | CKM         | SF     |      |    |            |     |                             |                               |      |
| 43        | MYBPC1      | SF     |      |    |            |     |                             |                               |      |
| 43        | MYF6        | SF     |      |    |            |     |                             |                               |      |
| 43        | PPP1R3A     | SF     |      | X  |            |     |                             |                               |      |
| 43        | SLN         | SF     |      |    |            |     |                             |                               |      |
| 43        | TNNC2       | SF     |      |    |            |     |                             |                               |      |

| 43        | TNNC1        | SF     |      |    |            |     |                             |                               |      |
|-----------|--------------|--------|------|----|------------|-----|-----------------------------|-------------------------------|------|
| 43        | TTN          | SF     |      |    |            |     |                             |                               |      |
| 43        | TCAP         | SF     |      |    |            |     |                             |                               |      |
| 43        | FBP2         | SF     |      |    |            |     |                             |                               |      |
| 43        | ATP2A1       | SF     |      |    |            |     |                             |                               |      |
| 43        | MYBPC2       | SF     |      |    |            |     |                             |                               |      |
| 43        | RPL3L        | SF     |      |    |            |     |                             |                               |      |
| 43        | COX6A2       | SF     |      |    |            |     |                             |                               |      |
| 43        | MB           | SF     |      |    |            |     |                             |                               |      |
| 43        | KBTBD10      | SF     |      |    |            |     |                             |                               |      |
| 43        | NRAP         | SF     |      |    |            |     |                             |                               |      |
| 43        | HSPB3        | SF     |      |    |            |     |                             |                               |      |
| 43        | APOBEC2      | SF     |      |    |            |     |                             |                               |      |
| 43        | MYL6F        | SF     |      |    |            |     |                             |                               |      |
| 43        | TMOD4        | SF     |      |    |            |     |                             |                               |      |
| 43        | SMPX         | SF     |      |    |            |     |                             |                               |      |
| 43        | ASB2         | SF     |      |    |            |     |                             |                               |      |
| 43        | FBXO40       | SF     |      |    |            |     |                             |                               |      |
| 43        | MYOZ2        | SF     |      |    |            |     |                             |                               |      |
| 43        | JPH1         | SF     |      |    |            |     |                             |                               |      |
| 43        | HHATL        | SF     |      |    |            |     |                             |                               |      |
| 43        | MYOZ1        | SF     |      |    |            |     |                             |                               |      |
| 43        | DUSP26       | SF     |      |    |            |     |                             |                               |      |
| 43        | MYPN         | SF     |      |    |            |     |                             |                               |      |
| 43        | TRIM63       | SF     |      |    |            |     |                             |                               |      |
| 43        | MYL1         | SF     |      |    |            |     |                             |                               |      |
| 43        | ASB5         | SF     |      |    |            |     |                             |                               |      |
| 43        | ABRA         | SF     |      | X  |            |     |                             |                               |      |
| 43        | LRR39        | SF     |      |    |            |     |                             |                               |      |
| 43        | PEBP4        | SF     |      |    |            |     |                             |                               |      |
| 43        | ANKRD23      | SF     |      |    |            |     |                             |                               |      |
| 43        | STAC3        | SF     |      |    |            |     |                             |                               |      |
| 43        | KBTBD5       | SF     |      |    |            |     |                             |                               |      |
| 43        | TXLNB        | SF     |      |    |            |     |                             |                               |      |
| 43        | VGLL2        | SF     |      | X  |            | X   |                             |                               |      |
| 43        | CMYA5        | SF     |      |    |            |     |                             |                               |      |
| 43        | C20orf166    | SF     |      |    |            |     |                             |                               |      |
| 43        | SLC36A2      | SF     |      |    |            |     |                             |                               |      |
| 43        | YIPF7        | SF     |      |    |            |     |                             |                               |      |
| 43        | LMOD3        | SF     | X    |    |            | X   |                             |                               |      |
| 43        | SMYD1        | SF     |      | X  |            |     |                             |                               |      |
| 43        | LMOD2        | SF     |      |    |            |     |                             |                               |      |
| 43        | MIR133A1     | SF     |      |    |            |     |                             |                               |      |
| 43        | LOC100131138 | SF     |      |    |            |     |                             |                               |      |
| 43        | MITP         | VF     |      |    |            |     |                             |                               |      |
| 43        | AMDHD1       | VF     | X    |    |            |     |                             |                               |      |
| 43        | GSDMA        | VF     | X    |    |            |     |                             |                               |      |
| Module ID | Gene Symbol  | Tissue | eQTL | TF | Key Driver | CAD | Candidate gene in GWAS for: |                               |      |
|           |              |        |      |    |            |     | Plasma glucose metabolism   | Plasma cholesterol metabolism | T2DM |
| 44        | CYBA         | SF     |      |    |            |     |                             |                               |      |
| 44        | TCN2         | SF     |      |    |            |     |                             |                               |      |
| 44        | ICAM2        | SF     |      |    |            |     |                             |                               |      |
| 44        | ZNF429       | SF     |      |    |            |     |                             |                               |      |
| 44        | CYP27C1      | SF     |      |    |            |     |                             |                               |      |
| 44        | SPDYE3       | SF     |      |    |            |     |                             |                               |      |
| 44        | KLHL5        | SF     |      |    |            |     |                             |                               |      |
| 44        | ZNF182       | SF     |      |    |            |     |                             |                               |      |
| 44        | ZNF37A       | SF     |      | X  |            |     |                             |                               |      |
| 44        | C10orf128    | SF     |      |    |            |     |                             |                               |      |
| 44        | ZMAT1        | SF     |      |    |            |     |                             |                               |      |
| 44        | CCDC66       | SF     |      |    |            |     |                             |                               |      |
| 44        | ZNF793       | SF     |      |    |            |     |                             |                               |      |
| 44        | CCDC46       | SF     |      |    |            |     |                             |                               |      |
| 44        | MAP9         | SF     |      |    |            |     |                             |                               |      |
| 44        | CCDC112      | SF     |      |    |            |     |                             |                               |      |
| 44        | RRBP1        | SF     |      |    |            |     |                             |                               |      |
| 44        | ZNF682       | SF     |      |    |            |     |                             |                               |      |
| 44        | CCDC30       | SF     |      |    |            |     |                             |                               |      |
| 44        | ZNF53        | SF     |      | X  |            |     |                             |                               |      |
| 44        | ZEB1         | SF     |      | X  |            |     |                             |                               |      |
| 44        | C13orf31     | SF     |      |    |            |     |                             |                               |      |
| 44        | DNAJC2       | SF     |      |    |            |     |                             |                               |      |
| 44        | ZNF195       | SF     |      |    |            |     |                             |                               |      |
| 44        | C22orf46     | SF     |      |    |            |     |                             |                               |      |
| 44        | ZNF234       | SF     |      |    |            |     |                             |                               |      |
| 44        | ZNF566       | SF     |      |    |            |     |                             |                               |      |
| 44        | PAFAH1B3     | SF     |      |    |            |     |                             |                               |      |
| 44        | SGOL2        | SF     |      |    |            |     |                             |                               |      |
| 44        | ZNF138       | SF     |      | X  |            |     |                             |                               |      |
| 44        | TLCD2        | SF     |      |    |            |     |                             |                               |      |
| 44        | MFNG         | SF     |      |    |            |     |                             |                               |      |
| 44        | NEXN         | SF     |      |    |            |     |                             |                               |      |

| 44        | ZNF573       | SF     |      |    |            |                             |                           |                               |      |
|-----------|--------------|--------|------|----|------------|-----------------------------|---------------------------|-------------------------------|------|
| 44        | GOLGA4       | SF     |      |    |            |                             |                           |                               |      |
| 44        | KIF21A       | SF     |      |    |            |                             |                           |                               |      |
| 44        | DHFR1L1      | SF     |      |    |            |                             |                           |                               |      |
| 44        | AHNAK        | SF     |      |    |            |                             |                           |                               |      |
| 44        | HPCAL1       | SF     |      |    |            |                             |                           |                               |      |
| 44        | MGST2        | SF     |      |    |            |                             |                           |                               |      |
| 44        | PNN          | SF     |      |    |            |                             |                           |                               |      |
| 44        | PSMB9        | SF     |      |    |            |                             |                           |                               |      |
| 44        | RECQL        | SF     |      |    |            |                             |                           |                               |      |
| 44        | ZNF91        | SF     |      | X  |            |                             | X                         |                               |      |
| 44        | ZKSCAN1      | SF     |      | X  |            |                             |                           |                               |      |
| 44        | EEA1         | SF     |      |    |            |                             |                           |                               |      |
| 44        | PSMB8        | SF     |      |    |            |                             |                           |                               |      |
| 44        | TRIP11       | SF     |      | X  |            |                             | X                         |                               |      |
| 44        | KIFS8        | SF     |      |    |            |                             |                           |                               |      |
| 44        | PPIG         | SF     |      |    |            |                             |                           |                               |      |
| 44        | SMC3         | SF     |      |    |            |                             |                           |                               |      |
| 44        | RAD50        | SF     |      |    |            |                             |                           |                               |      |
| 44        | CEBP2        | SF     |      |    |            |                             |                           |                               |      |
| 44        | MPHOSPH10    | SF     |      |    |            |                             |                           |                               |      |
| 44        | MAK          | SF     | X    |    |            |                             |                           |                               |      |
| 44        | MYH10        | SF     |      |    |            |                             |                           |                               |      |
| 44        | RIBF1        | SF     |      |    |            |                             |                           |                               |      |
| 44        | DIAPH2       | SF     |      |    |            |                             |                           |                               |      |
| 44        | ZNF33A       | SF     |      | X  |            |                             |                           |                               |      |
| 44        | ZNF208       | SF     |      |    |            |                             |                           |                               |      |
| 44        | NRM          | SF     |      |    |            |                             |                           |                               |      |
| 44        | PYCARD       | SF     |      |    |            |                             |                           |                               |      |
| 44        | ANKRD11      | SF     |      |    |            |                             |                           |                               |      |
| 44        | DNITIP2      | SF     |      |    |            |                             |                           |                               |      |
| 44        | FAM115A      | SF     |      |    |            |                             |                           |                               |      |
| 44        | KIAA1009     | SF     |      |    |            |                             |                           |                               |      |
| 44        | ANKRD26      | SF     |      |    |            |                             |                           |                               |      |
| 44        | ZC3H13       | SF     |      |    |            |                             |                           |                               |      |
| 44        | PHF3         | SF     |      |    |            |                             |                           |                               |      |
| 44        | LARP7        | SF     |      |    |            |                             |                           |                               |      |
| 44        | SFRS18       | SF     |      |    |            |                             |                           |                               |      |
| 44        | EIFS8        | SF     |      |    |            |                             |                           |                               |      |
| 44        | KIF20B       | SF     |      |    |            |                             |                           |                               |      |
| 44        | TAOK3        | SF     |      |    |            |                             |                           |                               |      |
| 44        | ESF1         | SF     |      |    |            |                             |                           |                               |      |
| 44        | MPHOSPH8     | SF     |      |    |            |                             |                           |                               |      |
| 44        | C10orf118    | SF     |      |    |            |                             |                           |                               |      |
| 44        | CCAR1        | SF     |      |    |            |                             |                           |                               |      |
| 44        | CHST7        | SF     |      |    |            |                             |                           |                               |      |
| 44        | NDUFA4L2     | SF     |      |    |            |                             |                           |                               |      |
| 44        | MAVS         | SF     |      |    |            |                             |                           |                               |      |
| 44        | CWC22        | SF     |      |    |            |                             |                           |                               |      |
| 44        | RBAK         | SF     |      | X  |            |                             |                           |                               |      |
| 44        | UPF3B        | SF     |      |    |            |                             |                           |                               |      |
| 44        | HMGNS        | SF     |      | X  |            |                             |                           |                               |      |
| 44        | CCDC55       | SF     |      |    |            |                             |                           |                               |      |
| 44        | COX4I2       | SF     |      |    |            |                             |                           |                               |      |
| 44        | LRRC1        | SF     |      |    |            |                             |                           |                               |      |
| 44        | SELM         | SF     |      |    |            |                             |                           |                               |      |
| 44        | ZNF721       | SF     |      |    |            |                             |                           |                               |      |
| 44        | ZNF441       | SF     |      |    |            |                             |                           |                               |      |
| 44        | C19orf18     | SF     |      |    |            |                             |                           |                               |      |
| 44        | SPDY1        | SF     |      |    |            |                             |                           |                               |      |
| 44        | GCC2         | SF     |      |    |            |                             |                           |                               |      |
| 44        | ZNF600       | SF     |      |    |            |                             |                           |                               |      |
| 44        | CCDC18       | SF     |      |    |            |                             |                           |                               |      |
| 44        | NCRNA00294   | SF     |      |    |            |                             |                           |                               |      |
| 44        | LOC100132707 | SF     |      |    |            |                             |                           |                               |      |
| 44        | ZNF378P      | SF     |      |    |            |                             |                           |                               |      |
| 44        | LOC284440    | SF     |      |    |            |                             |                           |                               |      |
| 44        | FLJ11235     | SF     |      |    |            |                             |                           |                               |      |
| 44        | LOC100329109 | SF     |      |    |            |                             |                           |                               |      |
| 44        | LOC100506046 | SF     |      |    |            |                             |                           |                               |      |
| 44        | ZFP112       | VF     |      |    |            |                             |                           |                               |      |
| 44        | KIAA1377     | VF     |      |    |            |                             |                           |                               |      |
| 44        | ZFP2         | VF     |      |    |            |                             |                           |                               |      |
| Module ID | Gene Symbol  | Tissue | eQTL | TF | Key Driver | Candidate gene in GWAS for: |                           |                               |      |
|           |              |        |      |    |            | CAD                         | Plasma glucose metabolism | Plasma cholesterol metabolism | T2DM |
| 47        | SIRPB1       | Liver  | X    |    |            |                             |                           |                               |      |
| 47        | F13A1        | Blood  |      |    |            |                             |                           |                               |      |
| 47        | GP1BA        | Blood  |      |    |            |                             |                           |                               |      |
| 47        | HGD          | Blood  | X    |    |            |                             |                           |                               |      |
| 47        | ITGB3        | Blood  |      |    |            |                             |                           |                               |      |
| 47        | PROS1        | Blood  |      |    |            |                             |                           |                               |      |
| 47        | CDKN1A       | Blood  |      |    |            |                             |                           |                               |      |

|            |       |   |  |   |  |   |  |
|------------|-------|---|--|---|--|---|--|
| 47 ITGA2B  | Blood |   |  |   |  |   |  |
| 47 VWF     | Blood |   |  |   |  |   |  |
| 47 LTBP1   | Blood |   |  |   |  |   |  |
| 47 ADRA2A  | Blood |   |  |   |  | X |  |
| 47 ALOX12  | Blood |   |  |   |  |   |  |
| 47 GUCY1A3 | Blood |   |  | X |  | X |  |
| 47 GUCY1B3 | Blood |   |  | X |  | X |  |
| 47 MAOB    | Blood |   |  |   |  |   |  |
| 47 PTGS1   | Blood |   |  |   |  |   |  |
| 47 LY6G6F  | Blood | X |  | X |  |   |  |
| 47 MGLL    | Blood |   |  |   |  |   |  |
| 47 PARVB   | Blood |   |  |   |  |   |  |
| 47 CTDSPL  | Blood |   |  |   |  |   |  |
| 47 SLC35D3 | Blood | X |  |   |  |   |  |
| 47 MFAP3L  | Blood | X |  | X |  |   |  |
| 47 TTC7B   | Blood |   |  |   |  |   |  |
| 47 TFPI    | Blood |   |  |   |  |   |  |
| 47 CMTM5   | Blood |   |  |   |  |   |  |
| 47 SLC6A4  | Blood |   |  |   |  |   |  |
| 47 PEAR1   | Blood |   |  |   |  |   |  |
| 47 PDE5A   | Blood | X |  |   |  |   |  |
| 47 GP6     | Blood |   |  |   |  |   |  |
| 47 CLEC1B  | Blood | X |  |   |  |   |  |
| 47 ELOVL7  | Blood | X |  |   |  |   |  |
| 47 ABCC4   | Blood | X |  |   |  |   |  |
| 47 NRG1    | Blood |   |  |   |  |   |  |
| 47 CLDN5   | Blood |   |  |   |  |   |  |
| 47 GFI1B   | Blood | X |  | X |  |   |  |
| 47 DNMT3   | Blood |   |  |   |  |   |  |
| 47 PCYT1B  | Blood |   |  |   |  |   |  |
| 47 VEPH1   | Blood |   |  |   |  |   |  |
| 47 LANCL3  | Blood |   |  |   |  |   |  |
| 47 NEXN    | Blood |   |  |   |  |   |  |
| 47 EGF     | Blood |   |  |   |  |   |  |
| 47 CTTN    | Blood |   |  |   |  |   |  |
| 47 BEND2   | Blood |   |  |   |  |   |  |
| 47 SEPT4   | Blood |   |  |   |  |   |  |
| 47 ACSBG1  | Blood |   |  |   |  |   |  |
| 47 CD9     | Blood |   |  |   |  |   |  |

|              |       |   |   |   |
|--------------|-------|---|---|---|
| 47 GNAZ      | Blood |   |   |   |
| 47 ITGB5     | Blood |   |   |   |
| 47 MAP1A     | Blood |   |   |   |
| 47 MEIS1     | Blood | X |   |   |
| 47 PBX1      | Blood | X |   |   |
| 47 PRKAR2B   | Blood |   |   |   |
| 47 CXCL5     | Blood | X |   |   |
| 47 SELP      | Blood |   |   |   |
| 47 SPARC     | Blood |   |   |   |
| 47 TAL1      | Blood | X | X |   |
| 47 THBS1     | Blood |   |   |   |
| 47 TNFSF4    | Blood |   |   |   |
| 47 RAB27B    | Blood |   |   |   |
| 47 CALD1     | Blood |   |   |   |
| 47 GRB14     | Blood | X |   | X |
| 47 HOMER2    | Blood |   |   |   |
| 47 MPL       | Blood |   |   |   |
| 47 VEGFC     | Blood |   |   |   |
| 47 TSC22D1   | Blood | X |   |   |
| 47 MYL9      | Blood |   |   |   |
| 47 AGPAT1    | Blood | X |   |   |
| 47 WASF3     | Blood | X |   |   |
| 47 FSTL1     | Blood | X |   |   |
| 47 MMRN1     | Blood |   |   |   |
| 47 HSPC159   | Blood |   |   |   |
| 47 VSIG2     | Blood |   |   |   |
| 47 EHD2      | Blood |   |   |   |
| 47 SEC14L5   | Blood | X |   |   |
| 47 RHOBTB1   | Blood |   |   |   |
| 47 ABLIM3    | Blood | X |   | X |
| 47 ENDOD1    | Blood |   |   |   |
| 47 TMEM158   | Blood |   |   |   |
| 47 RAB6B     | Blood |   |   |   |
| 47 TMEM40    | Blood |   |   |   |
| 47 NT5M      | Blood | X |   |   |
| 47 HRASLS    | Blood | X |   |   |
| 47 SLC24A3   | Blood |   |   |   |
| 47 HIST1H2BJ | Blood |   |   |   |
| 47 P2RY12    | Blood |   |   |   |
| 47 SH3BGRL2  | Blood |   |   |   |

|          |         |  |   |
|----------|---------|--|---|
| 47 JAM3  | Blood   |  |   |
| 47 MYLK  | Blood   |  |   |
| 47 PTCRA | Blood X |  | X |

All\_modules

| 47        | ESAM         | Blood  |      |    |            |     |                             |                               |      |  |
|-----------|--------------|--------|------|----|------------|-----|-----------------------------|-------------------------------|------|--|
| 47        | SPOCD1       | Blood  |      |    |            |     |                             |                               |      |  |
| 47        | ENKUR        | Blood  |      |    |            |     |                             |                               |      |  |
| 47        | C15orf26     | Blood  |      |    |            |     |                             |                               |      |  |
| 47        | SAMD14       | Blood  |      |    |            |     |                             |                               |      |  |
| 47        | FRMD3        | Blood  |      |    |            |     |                             |                               |      |  |
| 47        | PKHD1L1      | Blood  | X    |    |            |     |                             |                               |      |  |
| 47        | TREML1       | Blood  |      |    |            |     |                             |                               |      |  |
| 47        | TSPAN33      | Blood  |      |    |            |     |                             |                               |      |  |
| 47        | GRHL1        | Blood  | X    |    |            |     |                             |                               |      |  |
| 47        | FLJ44511     | Blood  |      |    |            |     |                             |                               |      |  |
| Module ID | Gene Symbol  | Tissue | eQTL | TF | Key Driver | CAD | Candidate gene in GWAS for: |                               |      |  |
|           |              |        |      |    |            |     | Plasma glucose metabolism   | Plasma cholesterol metabolism | T2DM |  |
| 62        | SGCA         | AAW    |      |    |            |     |                             |                               |      |  |
| 62        | CAPN3        | AAW    |      |    |            |     |                             |                               |      |  |
| 62        | COL4A4       | AAW    | X    |    | X          |     |                             |                               |      |  |
| 62        | RPGR         | AAW    |      |    |            |     |                             |                               |      |  |
| 62        | ODF2L        | AAW    |      |    |            |     |                             |                               |      |  |
| 62        | ZNF793       | AAW    |      |    |            |     |                             |                               |      |  |
| 62        | CYBSRL       | AAW    |      |    |            |     |                             |                               |      |  |
| 62        | AGTRAP       | AAW    |      |    |            |     |                             |                               |      |  |
| 62        | LNP1         | AAW    |      |    |            |     |                             |                               |      |  |
| 62        | HMSD         | AAW    |      |    |            |     |                             |                               |      |  |
| 62        | ZNF234       | AAW    | X    |    |            |     |                             |                               |      |  |
| 62        | ETV3         | AAW    |      | X  | X          |     |                             |                               |      |  |
| 62        | PAFAH1B3     | AAW    |      |    |            |     |                             |                               |      |  |
| 62        | ACOT13       | AAW    |      |    |            |     |                             |                               |      |  |
| 62        | ARHGAP33     | AAW    |      |    |            |     |                             |                               |      |  |
| 62        | CELF6        | AAW    |      |    |            |     |                             |                               |      |  |
| 62        | MOSPD2       | AAW    |      |    |            |     |                             |                               |      |  |
| 62        | ICAM3        | AAW    |      |    |            |     |                             |                               |      |  |
| 62        | MYL5         | AAW    |      |    |            |     |                             |                               |      |  |
| 62        | PSMB10       | AAW    |      |    |            |     |                             |                               |      |  |
| 62        | CLEC3B       | AAW    |      |    |            |     |                             | X                             |      |  |
| 62        | HIST1H4C     | AAW    |      |    |            |     |                             |                               |      |  |
| 62        | AP2S1        | AAW    |      |    |            |     |                             |                               |      |  |
| 62        | EIF4EBP1     | AAW    |      |    |            |     |                             |                               |      |  |
| 62        | IFI35        | AAW    |      |    |            |     |                             |                               |      |  |
| 62        | SCAMP2       | AAW    |      |    |            |     |                             |                               |      |  |
| 62        | NAB2         | AAW    |      | X  |            |     |                             |                               |      |  |
| 62        | SOX15        | AAW    |      | X  | X          |     |                             |                               |      |  |
| 62        | ZNF208       | AAW    |      |    |            |     |                             |                               |      |  |
| 62        | FBXO2        | AAW    |      |    |            |     |                             |                               |      |  |
| 62        | INTU         | AAW    |      |    |            |     |                             |                               |      |  |
| 62        | HAUS7        | AAW    |      |    |            |     |                             |                               |      |  |
| 62        | SLC39A4      | AAW    |      |    |            |     |                             |                               |      |  |
| 62        | FBXO5        | AAW    |      |    |            |     |                             |                               |      |  |
| 62        | BEND5        | AAW    |      |    |            |     |                             |                               |      |  |
| 62        | SGIP1        | AAW    |      |    |            |     |                             |                               |      |  |
| 62        | MRPL41       | AAW    |      |    |            |     |                             |                               |      |  |
| 62        | ZNF594       | AAW    |      |    |            |     |                             |                               |      |  |
| 62        | ZNF514       | AAW    |      |    |            |     |                             |                               |      |  |
| 62        | ZDHC12       | AAW    |      |    |            |     |                             |                               |      |  |
| 62        | C3orf15      | AAW    | X    |    | X          |     |                             |                               |      |  |
| 62        | LRRC1        | AAW    |      |    |            |     |                             |                               |      |  |
| 62        | C19orf33     | AAW    |      |    |            |     |                             |                               |      |  |
| 62        | CCDC151      | AAW    |      |    |            |     |                             |                               |      |  |
| 62        | ZNF441       | AAW    |      |    |            |     |                             |                               |      |  |
| 62        | PLEKHH2      | AAW    |      |    |            |     |                             |                               |      |  |
| 62        | SPDYE1       | AAW    |      |    |            |     |                             |                               |      |  |
| 62        | ZNF714       | AAW    |      |    |            |     |                             |                               |      |  |
| 62        | RPL23AP32    | AAW    |      |    |            |     |                             |                               |      |  |
| 62        | SNORD68      | AAW    |      |    |            |     |                             |                               |      |  |
| 62        | RNU4ATAC     | AAW    |      |    |            |     |                             |                               |      |  |
| 62        | LOC100132707 | AAW    |      |    |            |     |                             |                               |      |  |
| 62        | HCG27        | AAW    |      |    |            |     |                             |                               |      |  |
| 62        | LOC100329109 | AAW    |      |    |            |     |                             |                               |      |  |
| 62        | LOC100506046 | AAW    |      |    |            |     |                             |                               |      |  |
| 62        | GPX1         | IMA    |      |    |            |     |                             |                               |      |  |
| 62        | CC2D2B       | IMA    |      |    |            |     |                             |                               |      |  |
| 62        | C1orf204     | IMA    |      |    |            |     |                             |                               |      |  |
| 62        | ZNF814       | IMA    |      |    |            |     |                             |                               |      |  |
| 62        | DMGDH        | IMA    |      |    |            |     |                             |                               |      |  |
| 62        | RPP25        | IMA    | X    |    |            |     |                             |                               |      |  |
| 62        | ZNF273       | IMA    |      |    |            |     |                             |                               |      |  |
| 62        | ZNF69        | IMA    |      | X  |            |     |                             |                               |      |  |
| 62        | C10orf79     | IMA    | X    |    | X          |     |                             |                               |      |  |
| 62        | MCM8         | IMA    |      |    |            |     |                             |                               |      |  |
| 62        | TPTF2P2      | IMA    |      |    |            |     |                             |                               |      |  |
| 62        | HERC2P7      | IMA    |      |    |            |     |                             |                               |      |  |
| 62        | GABBR1       | Liver  |      |    |            |     |                             |                               |      |  |
| 62        | SNORD11      | Liver  |      |    |            |     |                             |                               |      |  |

| 62        | C8orf4      | Blood  |      |    |            |     |                             |                               |  |      |
|-----------|-------------|--------|------|----|------------|-----|-----------------------------|-------------------------------|--|------|
| 62        | AMT         | SM     |      |    |            |     |                             |                               |  |      |
| 62        | COL4A5      | SM     |      |    |            |     |                             |                               |  |      |
| 62        | MASTL       | SM     | X    |    |            |     |                             |                               |  |      |
| 62        | DAPK2       | SM     | X    |    | X          |     |                             |                               |  |      |
| 62        | CSAD        | SM     |      |    |            |     |                             |                               |  |      |
| 62        | KAT2A       | SM     |      | X  |            |     |                             |                               |  |      |
| 62        | NANOG       | SM     |      | X  | X          |     |                             |                               |  |      |
| 62        | ZNF514      | SM     |      |    |            |     |                             |                               |  |      |
| 62        | SNORA33     | SM     |      |    |            |     |                             |                               |  |      |
| 62        | LOC344595   | VF     |      |    |            |     |                             |                               |  |      |
| Module ID | Gene Symbol | Tissue | eQTL | TF | Key Driver | CAD | Candidate gene in GWAS for: |                               |  |      |
|           |             |        |      |    |            |     | Plasma glucose metabolism   | Plasma cholesterol metabolism |  | T2DM |
| 63        | PEPD        | VF     |      |    |            |     |                             | X                             |  |      |
| 63        | TSPO        | VF     |      |    |            |     |                             |                               |  |      |
| 63        | L3MBTL3     | VF     |      |    |            |     |                             |                               |  |      |
| 63        | ZCCHC11     | VF     |      |    |            |     |                             |                               |  |      |
| 63        | PM20D2      | VF     |      |    |            |     |                             |                               |  |      |
| 63        | ETFB        | VF     |      |    |            |     |                             |                               |  |      |
| 63        | GATSL3      | VF     |      |    |            |     |                             |                               |  |      |
| 63        | HSD17B10    | VF     |      |    |            |     |                             |                               |  | X    |
| 63        | FITM2       | VF     |      |    |            |     |                             |                               |  |      |
| 63        | LIG4        | VF     |      |    |            |     |                             |                               |  |      |
| 63        | C10orf125   | VF     |      |    |            |     |                             |                               |  |      |
| 63        | PSIP1       | VF     |      |    |            |     |                             |                               |  |      |
| 63        | NSDHL       | VF     |      |    |            |     |                             |                               |  |      |
| 63        | GEN1        | VF     |      |    |            |     |                             |                               |  |      |
| 63        | OAZ3        | VF     |      |    |            |     |                             |                               |  |      |
| 63        | RBBP4       | VF     |      |    |            |     |                             |                               |  |      |
| 63        | LRRFIP1     | VF     |      | X  | X          |     |                             |                               |  |      |
| 63        | CTF1        | VF     |      |    |            |     |                             |                               |  |      |
| 63        | CHORDC1     | VF     |      |    |            |     |                             |                               |  |      |
| 63        | SETDB2      | VF     |      |    |            |     |                             |                               |  |      |
| 63        | DHCR7       | VF     |      |    |            |     |                             |                               |  |      |
| 63        | WDR52       | VF     |      |    |            |     |                             |                               |  |      |
| 63        | ZFP62       | VF     |      |    |            |     |                             |                               |  |      |
| 63        | PARP8       | VF     |      |    |            |     |                             |                               |  |      |
| 63        | RBM4        | VF     |      | X  |            |     |                             |                               |  |      |
| 63        | ZFYVE21     | VF     |      |    |            |     |                             |                               |  |      |
| 63        | HNRNPA2B1   | VF     |      |    |            |     |                             |                               |  |      |
| 63        | NPAT        | VF     |      | X  | X          |     |                             |                               |  |      |
| 63        | RBBP8       | VF     |      |    |            |     |                             |                               |  |      |
| 63        | BTAFL1      | VF     |      | X  | X          |     |                             |                               |  |      |
| 63        | MTRF1       | VF     |      |    |            |     |                             |                               |  |      |
| 63        | NUCB2       | VF     |      |    |            |     |                             |                               |  |      |
| 63        | NKTR        | VF     |      |    |            |     |                             |                               |  |      |
| 63        | TARBP1      | VF     |      |    |            |     |                             |                               |  |      |
| 63        | MALT1       | VF     |      |    |            |     |                             |                               |  |      |
| 63        | TMED1       | VF     |      |    |            |     |                             |                               |  |      |
| 63        | KIF3A       | VF     |      |    |            |     |                             |                               |  |      |
| 63        | ZNF184      | VF     |      |    |            |     |                             |                               |  |      |
| 63        | TARDBP      | VF     |      | X  |            |     |                             |                               |  |      |
| 63        | SLC25A10    | VF     |      |    |            |     |                             |                               |  |      |
| 63        | GCFC1       | VF     |      | X  | X          |     |                             |                               |  |      |
| 63        | SACS        | VF     |      |    |            |     |                             |                               |  |      |
| 63        | KIAA0528    | VF     |      |    |            |     |                             |                               |  |      |
| 63        | ABHD14A     | VF     |      |    |            |     |                             |                               |  |      |
| 63        | ATL3        | VF     |      |    |            |     |                             |                               |  |      |
| 63        | MRPL2       | VF     |      |    |            |     |                             |                               |  |      |
| 63        | NIN         | VF     |      |    |            |     |                             |                               |  |      |
| 63        | DONSON      | VF     |      |    |            |     |                             |                               |  |      |
| 63        | MCM9        | VF     |      |    |            |     |                             |                               |  |      |
| 63        | RAB20       | VF     |      |    |            |     |                             |                               |  |      |
| 63        | PRPF38B     | VF     |      |    |            |     |                             |                               |  |      |
| 63        | C12orf95    | VF     |      |    |            |     |                             |                               |  |      |
| 63        | FGD6        | VF     |      |    |            |     |                             |                               |  |      |
| 63        | CENPJ       | VF     |      |    |            |     |                             |                               |  |      |
| 63        | CENL1       | VF     |      |    |            |     |                             |                               |  |      |
| 63        | HS1BP3      | VF     |      |    |            |     |                             |                               |  |      |
| 63        | CCDC14      | VF     |      |    |            |     |                             |                               |  |      |
| 63        | C1orf163    | VF     |      |    |            |     |                             |                               |  |      |
| 63        | NDUFS7      | VF     | X    |    |            |     |                             |                               |  |      |
| 63        | CEP70       | VF     |      |    |            |     |                             |                               |  |      |
| 63        | CEP135      | VF     |      |    |            |     |                             |                               |  |      |
| 63        | ANKRD36B    | VF     |      |    |            |     |                             |                               |  |      |
| 63        | MCM8        | VF     |      |    |            |     |                             |                               |  |      |
| 63        | ZC3H8       | VF     |      | X  | X          |     |                             |                               |  |      |
| 63        | GLMN        | VF     |      |    |            |     |                             |                               |  |      |
| 63        | HELQ        | VF     |      |    |            |     |                             |                               |  |      |
| 63        | CCDC45      | VF     |      |    |            |     |                             |                               |  |      |
| 63        | ZNF700      | VF     |      |    |            |     |                             |                               |  |      |
| 63        | IFI27L1     | VF     | X    |    | X          |     |                             |                               |  |      |



| 63        | PDK1L        | VF     |      |    |            |     |                             |                               |      |  |  |
|-----------|--------------|--------|------|----|------------|-----|-----------------------------|-------------------------------|------|--|--|
| 63        | PSENE1       | VF     |      |    |            |     |                             |                               |      |  |  |
| 63        | C15orf38     | VF     |      |    |            |     |                             |                               |      |  |  |
| 63        | SASS6        | VF     |      |    |            |     |                             |                               |      |  |  |
| 63        | C5orf34      | VF     |      |    |            |     |                             |                               |      |  |  |
| 63        | CMAH         | VF     |      |    |            |     |                             |                               |      |  |  |
| 63        | LOC285359    | VF     |      |    |            |     |                             |                               |      |  |  |
| 63        | DKFZ779M065  | VF     |      |    |            |     |                             |                               |      |  |  |
| 63        | FLJ31306     | VF     |      |    |            |     |                             |                               |      |  |  |
| 63        | CCDC144B     | VF     |      |    |            |     |                             |                               |      |  |  |
| Module ID | Gene Symbol  | Tissue | eQTL | TF | Key Driver | CAD | Candidate gene in GWAS for: |                               |      |  |  |
|           |              |        |      |    |            |     | Plasma glucose metabolism   | Plasma cholesterol metabolism | T2DM |  |  |
| 68        | MYOC         | AAW    |      |    |            |     |                             |                               |      |  |  |
| 68        | F10          | AAW    |      |    |            |     |                             |                               |      |  |  |
| 68        | IGFBP1       | AAW    |      |    |            |     |                             |                               |      |  |  |
| 68        | STEAP2       | AAW    |      |    |            |     |                             |                               |      |  |  |
| 68        | LRRN3        | AAW    |      |    |            |     |                             |                               |      |  |  |
| 68        | SYTL2        | AAW    |      |    |            |     |                             |                               |      |  |  |
| 68        | AIF1L        | AAW    | X    |    |            |     |                             |                               |      |  |  |
| 68        | IL18R1       | AAW    |      |    |            |     |                             |                               |      |  |  |
| 68        | CALCRL       | AAW    |      |    |            |     |                             |                               |      |  |  |
| 68        | HSPB3        | AAW    | X    |    |            |     |                             |                               |      |  |  |
| 68        | MYOZ1        | AAW    | X    |    |            |     |                             |                               |      |  |  |
| 68        | GRHL2        | AAW    |      |    |            |     |                             |                               |      |  |  |
| 68        | ZNF257       | AAW    |      |    |            |     |                             |                               |      |  |  |
| 68        | ADHFE1       | AAW    |      |    |            |     |                             |                               |      |  |  |
| 68        | LHFP11       | AAW    |      |    |            |     |                             |                               |      |  |  |
| 68        | SERHL        | AAW    | X    |    |            |     |                             |                               |      |  |  |
| 68        | LHCGR        | IMA    |      |    |            |     |                             |                               |      |  |  |
| 68        | HIPK3        | IMA    |      |    |            |     |                             |                               |      |  |  |
| 68        | C11orf93     | IMA    |      |    |            |     |                             |                               |      |  |  |
| 68        | AIF1L        | IMA    |      |    |            |     |                             |                               |      |  |  |
| 68        | ZNF43        | IMA    | X    |    | X          |     |                             |                               |      |  |  |
| 68        | ZNF124       | IMA    |      |    |            |     |                             |                               |      |  |  |
| 68        | BST1         | IMA    |      |    |            |     |                             |                               |      |  |  |
| 68        | USP6         | IMA    |      |    |            |     |                             |                               |      |  |  |
| 68        | SLC22A15     | IMA    |      |    |            |     |                             |                               |      |  |  |
| 68        | CLMN         | IMA    |      |    |            |     |                             |                               |      |  |  |
| 68        | RASA4        | Liver  |      |    |            |     |                             |                               |      |  |  |
| 68        | HS3ST2       | Liver  |      |    |            |     |                             |                               |      |  |  |
| 68        | RTP3         | Liver  |      |    |            |     |                             |                               |      |  |  |
| 68        | ARLSB        | Liver  |      |    |            |     |                             |                               |      |  |  |
| 68        | ALOX15B      | Blood  |      |    |            |     |                             |                               |      |  |  |
| 68        | GLOD5        | Blood  |      |    |            |     |                             |                               |      |  |  |
| 68        | LOC100271836 | Blood  |      |    |            |     |                             |                               |      |  |  |
| 68        | IGAM1        | SM     |      |    |            |     |                             |                               |      |  |  |
| 68        | KLHL5        | SM     |      |    |            |     |                             |                               |      |  |  |
| 68        | ZMAT1        | SM     |      |    |            |     |                             |                               |      |  |  |
| 68        | CCDC66       | SM     |      |    |            |     |                             |                               |      |  |  |
| 68        | CCDC41       | SM     |      |    |            |     |                             |                               |      |  |  |
| 68        | LIG4         | SM     |      |    |            |     |                             |                               |      |  |  |
| 68        | C2orf63      | SM     |      |    |            |     |                             |                               |      |  |  |
| 68        | ZNF138       | SM     |      | X  | X          |     |                             |                               |      |  |  |
| 68        | Cxorf57      | SM     |      |    |            |     |                             |                               |      |  |  |
| 68        | ZNF92        | SM     |      | X  | X          |     |                             |                               |      |  |  |
| 68        | ANKRD26      | SM     |      |    |            |     |                             |                               |      |  |  |
| 68        | ESF1         | SM     |      |    |            |     |                             |                               |      |  |  |
| 68        | ETAA1        | SM     |      |    |            |     |                             |                               |      |  |  |
| 68        | ZMYM1        | SM     |      |    |            |     |                             |                               |      |  |  |
| 68        | HMGNS        | SM     |      | X  | X          |     |                             |                               |      |  |  |
| 68        | ZNF721       | SM     |      |    |            |     |                             |                               |      |  |  |
| 68        | ZNF441       | SM     |      |    |            |     |                             |                               |      |  |  |
| 68        | GCC2         | SM     |      |    |            |     |                             |                               |      |  |  |
| 68        | ANKDD1A      | SM     |      |    |            |     |                             |                               |      |  |  |
| 68        | LOC339751    | SM     |      |    |            |     |                             |                               |      |  |  |
| 68        | DKK3         | SF     |      |    |            |     |                             |                               |      |  |  |
| 68        | PLAU         | SF     |      |    |            |     |                             |                               |      |  |  |
| 68        | BHMT2        | SF     |      |    |            |     |                             |                               |      |  |  |
| 68        | RPH3AL       | SF     |      |    |            |     |                             |                               |      |  |  |
| 68        | FGF10        | SF     |      |    |            |     |                             |                               |      |  |  |
| 68        | GABRE        | SF     |      |    |            |     |                             |                               |      |  |  |
| 68        | PRND         | SF     |      |    |            |     |                             |                               |      |  |  |
| 68        | GAL3ST4      | SF     |      |    |            |     |                             |                               |      |  |  |
| 68        | ANKRD42      | SF     | X    |    | X          |     |                             |                               |      |  |  |
| 68        | HEATR4       | SF     |      |    |            |     |                             |                               |      |  |  |
| 68        | RASL11A      | SF     |      |    |            |     |                             |                               |      |  |  |
| 68        | CP           | VF     |      |    |            |     |                             |                               |      |  |  |
| 68        | LDLR         | VF     |      |    |            | X   |                             |                               | X    |  |  |
| 68        | SCN2A        | VF     |      |    |            |     |                             |                               |      |  |  |
| 68        | PACRG        | VF     |      |    |            |     |                             |                               |      |  |  |
| 68        | LYGE         | VF     |      |    |            |     |                             |                               |      |  |  |
| 68        | NUDT2        | VF     | X    |    |            |     |                             |                               |      |  |  |

| Module ID | Gene Symbol | Tissue | eQTL | TF | Key Driver | CAD | Candidate gene in GWAS for: |                               | T2DM |
|-----------|-------------|--------|------|----|------------|-----|-----------------------------|-------------------------------|------|
|           |             |        |      |    |            |     | Plasma glucose metabolism   | Plasma cholesterol metabolism |      |
| 73        | COL1A1      | Liver  |      |    |            |     |                             |                               |      |
| 73        | COL1A2      | Liver  |      |    |            |     |                             |                               |      |
| 73        | PMP22       | Liver  |      |    |            |     |                             |                               |      |
| 73        | LTBP2       | Liver  |      |    |            |     |                             |                               |      |
| 73        | MGP         | Liver  |      |    |            |     |                             |                               |      |
| 73        | PTGDS       | Liver  |      |    |            |     |                             |                               |      |
| 73        | PTGIS       | Liver  | X    |    |            |     |                             |                               |      |
| 73        | NTRK2       | Liver  |      |    |            |     |                             |                               |      |
| 73        | CP2         | Liver  |      |    |            |     |                             |                               |      |
| 73        | DKK3        | Liver  |      |    |            |     |                             |                               |      |
| 73        | NPNT        | Liver  |      |    |            |     |                             |                               |      |
| 73        | FLNA        | Liver  |      | X  |            |     |                             |                               |      |
| 73        | MMP2        | Liver  |      |    |            |     |                             |                               |      |
| 73        | AEBP1       | Liver  |      | X  | X          |     |                             |                               |      |
| 73        | C1QTNF7     | Liver  |      |    |            |     |                             |                               |      |
| 73        | SSPN        | Liver  |      |    |            |     |                             |                               |      |
| 73        | GPC3        | Liver  |      |    |            |     |                             |                               |      |
| 73        | SMOC2       | Liver  |      |    |            |     |                             |                               |      |
| 73        | SCUBE2      | Liver  |      |    |            |     |                             |                               |      |
| 73        | SRPX        | Liver  |      |    |            |     |                             |                               |      |
| 73        | IGSF10      | Liver  |      |    |            |     |                             |                               |      |
| 73        | CLDN11      | Liver  |      |    |            |     |                             |                               |      |
| 73        | DPYSL3      | Liver  |      |    |            |     |                             |                               |      |
| 73        | MFAP4       | Liver  |      |    |            |     |                             |                               |      |
| 73        | GPC4        | Liver  |      |    |            |     |                             |                               |      |
| 73        | FRZB        | Liver  |      |    |            |     |                             |                               |      |
| 73        | APOD        | Liver  | X    |    |            |     |                             |                               |      |
| 73        | COL15A1     | Liver  | X    |    |            |     |                             |                               |      |
| 73        | CRYAB       | Liver  |      |    |            |     |                             |                               |      |
| 73        | DPT         | Liver  |      |    |            |     |                             |                               |      |
| 73        | FBLN1       | Liver  |      |    |            |     |                             |                               |      |
| 73        | FMOD        | Liver  |      |    |            |     |                             |                               |      |
| 73        | IGFBP6      | Liver  |      |    |            |     |                             |                               |      |
| 73        | MN1         | Liver  |      |    |            |     |                             |                               |      |
| 73        | PRELP       | Liver  |      |    |            |     |                             |                               |      |
| 73        | SOD3        | Liver  |      |    |            |     |                             |                               |      |
| 73        | THBS2       | Liver  |      |    |            |     |                             |                               |      |
| 73        | FAP         | Liver  |      |    |            |     |                             |                               |      |
| 73        | ROR2        | Liver  |      |    |            |     |                             |                               |      |
| 73        | PTGE5       | Liver  |      |    |            |     |                             |                               |      |
| 73        | COL8A2      | Liver  |      |    |            |     |                             |                               |      |
| 73        | ISLR        | Liver  |      |    |            |     |                             |                               |      |
| 73        | LOXL1       | Liver  |      |    |            |     |                             |                               |      |
| 73        | MEOX2       | Liver  |      | X  |            |     |                             |                               |      |
| 73        | MYL9        | Liver  |      |    |            |     |                             |                               |      |
| 73        | SPON1       | Liver  | X    |    |            |     |                             |                               |      |
| 73        | PDGFRL      | Liver  | X    |    |            |     |                             |                               |      |
| 73        | THY1        | Liver  |      |    |            |     |                             |                               |      |
| 73        | FBLN5       | Liver  | X    |    | X          |     |                             |                               |      |
| 73        | ADAMTS3     | Liver  |      |    |            |     |                             |                               |      |
| 73        | HSPB7       | Liver  |      |    |            |     |                             |                               |      |
| 73        | EHD2        | Liver  |      |    |            |     |                             |                               |      |
| 73        | PDZRN3      | Liver  |      |    |            |     |                             |                               |      |
| 73        | ABI3BP      | Liver  |      |    |            |     |                             |                               |      |
| 73        | VGLL3       | Liver  |      | X  | X          |     |                             |                               |      |
| 73        | SERTAD4     | Liver  | X    |    | X          |     |                             |                               |      |
| 73        | VANGL2      | Liver  |      |    |            |     |                             |                               |      |
| 73        | SLC24A3     | Liver  |      |    |            |     |                             |                               |      |
| 73        | COL14A1     | Liver  |      |    |            |     |                             |                               |      |
| 73        | CLSTN2      | Liver  |      |    |            |     |                             |                               |      |
| 73        | RASL11B     | Liver  |      |    |            |     |                             |                               |      |
| 73        | GAL3ST4     | Liver  |      |    |            |     |                             |                               |      |
| 73        | COL21A1     | Liver  |      |    |            |     |                             |                               |      |
| 73        | AHNAK2      | Liver  |      |    |            |     |                             |                               |      |
| 73        | HSPB6       | Liver  |      |    |            |     |                             |                               |      |
| 73        | MAMDC2      | Liver  |      |    |            |     |                             |                               |      |
| 73        | SVEP1       | Liver  |      |    |            |     |                             |                               |      |
| 73        | CCDC80      | Liver  |      |    |            |     |                             |                               |      |
| 73        | FIBIN       | Liver  |      |    |            |     |                             |                               |      |
| 73        | CHI3L1      | Liver  | X    |    |            |     |                             |                               |      |
| Module ID | Gene Symbol | Tissue | eQTL | TF | Key Driver | CAD | Candidate gene in GWAS for: |                               | T2DM |
|           |             |        |      |    |            |     | Plasma glucose metabolism   | Plasma cholesterol metabolism |      |
| 76        | ADR2        | VF     |      |    |            |     |                             |                               |      |
| 76        | AVPR2       | VF     |      |    |            |     |                             |                               |      |
| 76        | ENG         | VF     |      |    |            |     |                             |                               |      |
| 76        | TCN2        | VF     |      |    |            |     |                             |                               |      |
| 76        | VWF         | VF     |      |    |            |     |                             |                               |      |

| 76        | ADRA2C      | VF     |      |    |            |                             |                           |                               |      |   |  |
|-----------|-------------|--------|------|----|------------|-----------------------------|---------------------------|-------------------------------|------|---|--|
| 76        | CA4         | VF     |      |    |            |                             |                           |                               |      |   |  |
| 76        | TPD5L1      | VF     |      |    |            |                             |                           |                               |      |   |  |
| 76        | BAAC        | VF     |      |    |            |                             |                           |                               |      |   |  |
| 76        | CABP1       | VF     |      |    |            |                             |                           |                               |      |   |  |
| 76        | TGFB111     | VF     |      | X  | X          |                             |                           |                               |      |   |  |
| 76        | RHOC        | VF     |      |    |            |                             |                           |                               |      |   |  |
| 76        | PLOD3       | VF     |      |    |            |                             |                           |                               |      |   |  |
| 76        | FAM162B     | VF     |      |    |            |                             |                           |                               |      |   |  |
| 76        | LRR32       | VF     |      |    |            |                             |                           |                               |      |   |  |
| 76        | CLDN5       | VF     |      |    |            |                             |                           |                               |      |   |  |
| 76        | CASKIN2     | VF     |      |    |            |                             |                           |                               |      |   |  |
| 76        | PDE2A       | VF     |      |    |            |                             |                           |                               |      |   |  |
| 76        | CD300LG     | VF     |      |    |            |                             |                           |                               |      |   |  |
| 76        | AIF1L       | VF     |      |    |            |                             |                           |                               |      |   |  |
| 76        | TRPM4       | VF     |      |    |            |                             |                           |                               |      |   |  |
| 76        | HSPA12B     | VF     |      |    |            |                             |                           |                               |      |   |  |
| 76        | CRIP2       | VF     |      |    |            |                             |                           |                               |      |   |  |
| 76        | GJA4        | VF     |      |    |            |                             |                           |                               |      |   |  |
| 76        | GNAZ        | VF     |      |    |            |                             |                           |                               |      |   |  |
| 76        | PDGFB       | VF     |      |    |            |                             |                           |                               |      |   |  |
| 76        | TAL1        | VF     |      | X  |            |                             |                           |                               |      |   |  |
| 76        | ADAM15      | VF     |      |    |            |                             |                           |                               |      |   |  |
| 76        | NOTCH4      | VF     |      |    |            |                             |                           |                               |      |   |  |
| 76        | TIE1        | VF     |      |    |            |                             |                           |                               |      |   |  |
| 76        | MALL        | VF     |      |    |            |                             |                           |                               |      |   |  |
| 76        | SOX13       | VF     |      | X  |            |                             |                           |                               |      |   |  |
| 76        | RAMP2       | VF     | X    |    | X          |                             |                           |                               |      |   |  |
| 76        | RAMP3       | VF     |      |    |            |                             |                           |                               |      |   |  |
| 76        | PCGF2       | VF     |      | X  |            |                             |                           |                               |      |   |  |
| 76        | BRCA1       | VF     |      | X  |            |                             |                           |                               |      |   |  |
| 76        | HYAL1       | VF     |      |    |            |                             |                           |                               |      |   |  |
| 76        | BACE2       | VF     |      |    |            |                             |                           |                               |      |   |  |
| 76        | LMCD1       | VF     |      | X  |            |                             |                           |                               |      |   |  |
| 76        | ARHGEF17    | VF     |      |    |            |                             |                           |                               |      |   |  |
| 76        | NPDC1       | VF     |      |    |            |                             |                           |                               |      |   |  |
| 76        | KIF26A      | VF     |      |    |            |                             |                           |                               |      |   |  |
| 76        | KIF20B      | VF     |      |    |            |                             |                           |                               |      |   |  |
| 76        | EGFL7       | VF     |      |    |            |                             |                           |                               |      |   |  |
| 76        | RASL12      | VF     |      |    |            |                             |                           |                               |      |   |  |
| 76        | PCDH12      | VF     |      |    |            |                             |                           |                               |      |   |  |
| 76        | RASIP1      | VF     |      |    |            |                             |                           |                               |      |   |  |
| 76        | ROBO4       | VF     |      |    |            |                             |                           |                               |      |   |  |
| 76        | NDUFA4L2    | VF     |      |    |            |                             |                           |                               |      |   |  |
| 76        | TINAGL1     | VF     |      |    |            |                             |                           |                               |      | X |  |
| 76        | SOX17       | VF     |      | X  | X          |                             |                           |                               |      |   |  |
| 76        | ARAP3       | VF     |      |    |            |                             |                           |                               |      |   |  |
| 76        | Cxorf36     | VF     |      |    |            |                             |                           |                               |      |   |  |
| 76        | GRRP1       | VF     |      |    |            |                             |                           |                               |      |   |  |
| 76        | ARHGEF15    | VF     |      |    |            |                             |                           |                               |      |   |  |
| 76        | USHBP1      | VF     |      |    |            |                             |                           |                               |      |   |  |
| 76        | SEMA6B      | VF     |      |    |            |                             |                           |                               |      |   |  |
| 76        | RBP7        | VF     |      |    |            |                             |                           |                               |      |   |  |
| 76        | C20orf160   | VF     |      |    |            |                             |                           |                               |      |   |  |
| 76        | RAB3C       | VF     |      |    |            |                             |                           |                               |      |   |  |
| 76        | ESAM        | VF     |      |    |            |                             |                           |                               |      |   |  |
| 76        | CLEC14A     | VF     |      |    |            |                             |                           |                               |      |   |  |
| 76        | GPIHBP1     | VF     |      |    |            |                             |                           |                               |      |   |  |
| 76        | BCL6B       | VF     |      | X  | X          |                             |                           |                               |      |   |  |
| 76        | KANK3       | VF     |      |    |            |                             |                           |                               |      |   |  |
| 76        | TMEM88      | VF     |      |    |            |                             |                           |                               |      |   |  |
| 76        | LOC158376   | VF     |      |    |            |                             |                           |                               |      |   |  |
| 76        | FLI11235    | VF     |      |    |            |                             |                           |                               |      |   |  |
| Module ID | Gene Symbol | Tissue | eQTL | TF | Key Driver | Candidate gene in GWAS for: |                           |                               |      |   |  |
|           |             |        |      |    |            | CAD                         | Plasma glucose metabolism | Plasma cholesterol metabolism | T2DM |   |  |
| 94        | ANK1        | Blood  |      |    |            |                             |                           |                               |      |   |  |
| 94        | EPB42       | Blood  |      |    |            |                             |                           |                               |      |   |  |
| 94        | FECH        | Blood  |      |    |            |                             |                           |                               |      |   |  |
| 94        | HMBS        | Blood  |      |    |            |                             |                           |                               |      |   |  |
| 94        | SLC4A1      | Blood  |      |    |            |                             |                           |                               |      |   |  |
| 94        | SNCA        | Blood  |      |    |            |                             |                           |                               |      |   |  |
| 94        | OR2W3       | Blood  |      |    |            |                             |                           |                               |      |   |  |
| 94        | ACSL6       | Blood  |      |    |            |                             |                           |                               |      |   |  |
| 94        | TSP02       | Blood  |      |    |            |                             |                           |                               |      |   |  |
| 94        | IFIT1B      | Blood  |      |    |            |                             |                           |                               |      |   |  |
| 94        | SRRD        | Blood  |      |    |            |                             |                           |                               |      |   |  |
| 94        | SLC6A9      | Blood  |      |    |            |                             |                           |                               |      |   |  |
| 94        | ALDH5A1     | Blood  | X    |    |            |                             |                           |                               |      |   |  |
| 94        | EPB49       | Blood  |      |    |            |                             |                           |                               |      |   |  |
| 94        | SLC14A1     | Blood  |      |    |            |                             |                           |                               |      |   |  |
| 94        | CA1         | Blood  |      |    |            |                             |                           |                               |      |   |  |
| 94        | TBCEL       | Blood  | X    |    | X          |                             |                           |                               |      |   |  |



| Module ID | Gene Symbol  | Tissue | eQTL | TF | Key Driver | CAD | Candidate gene in GWAS for: |                               |      |
|-----------|--------------|--------|------|----|------------|-----|-----------------------------|-------------------------------|------|
|           |              |        |      |    |            |     | Plasma glucose metabolism   | Plasma cholesterol metabolism | T2DM |
| 100       | FBXO2        | S      |      |    |            |     |                             |                               |      |
| 100       | 7            | F      |      |    |            |     |                             |                               |      |
| 100       | FAM89        | S      |      |    |            |     |                             |                               |      |
| 103       | C1QB         | AAW    |      |    |            |     |                             |                               |      |
| 103       | CD14         | AAW    |      |    |            |     |                             |                               |      |
| 103       | CD4          | AAW    |      |    |            |     |                             |                               |      |
| 103       | LGMN         | AAW    |      |    |            |     |                             |                               |      |
| 103       | CD37         | AAW    |      |    |            |     |                             |                               |      |
| 103       | CD68         | AAW    |      |    |            |     |                             |                               |      |
| 103       | TBXAS1       | AAW    |      |    |            |     |                             |                               |      |
| 103       | CD33         | AAW    |      |    |            |     |                             |                               |      |
| 103       | VSIG4        | AAW    |      |    |            |     |                             |                               |      |
| 103       | CXCL16       | AAW    |      |    |            |     |                             |                               |      |
| 103       | C1QC         | AAW    |      |    |            |     |                             |                               |      |
| 103       | SLC7A7       | AAW    |      |    |            |     |                             |                               |      |
| 103       | DHRS9        | AAW    |      |    |            |     |                             |                               |      |
| 103       | TYROBP       | AAW    |      |    |            |     |                             |                               |      |
| 103       | AOAH         | AAW    |      |    |            |     |                             |                               |      |
| 103       | PLEKH02      | AAW    |      |    |            |     |                             |                               |      |
| 103       | IL18         | AAW    |      |    |            |     |                             |                               |      |
| 103       | AIF1         | AAW    |      |    |            |     |                             |                               |      |
| 103       | CAPG         | AAW    |      |    |            |     |                             |                               |      |
| 103       | CD48         | AAW    |      |    |            |     |                             |                               |      |
| 103       | CD72         | AAW    |      |    |            |     |                             |                               |      |
| 103       | CD52         | AAW    |      |    |            |     |                             |                               |      |
| 103       | GNA15        | AAW    |      |    |            |     |                             |                               |      |
| 103       | HLA-DMB      | AAW    |      |    |            |     |                             |                               |      |
| 103       | RAC2         | AAW    |      |    |            |     |                             |                               |      |
| 103       | UCP2         | AAW    |      |    |            |     |                             |                               |      |
| 103       | VAMP8        | AAW    |      |    | X          | X   |                             |                               |      |
| 103       | LY86         | AAW    |      |    |            |     |                             |                               |      |
| 103       | CSF1R        | AAW    |      |    |            |     |                             |                               |      |
| 103       | RNAS6        | AAW    |      |    |            |     |                             |                               |      |
| 103       | HLA-DMA      | AAW    |      |    |            |     |                             | X                             |      |
| 103       | PLTP         | AAW    |      |    |            |     |                             |                               |      |
| 103       | CD300C       | AAW    |      |    |            |     |                             |                               |      |
| 103       | C1QA         | AAW    |      |    |            |     |                             |                               |      |
| 103       | SLC15A3      | AAW    |      |    |            |     |                             |                               |      |
| 103       | TREM2        | AAW    |      |    |            |     |                             |                               |      |
| 103       | CPVL         | AAW    |      |    |            |     |                             |                               |      |
| 103       | MS4A6A       | AAW    |      |    |            |     |                             |                               |      |
| 103       | MS4A4A       | AAW    |      |    |            |     |                             |                               |      |
| 103       | EFHD2        | AAW    |      |    |            |     |                             |                               |      |
| 103       | TNFAIP9L2    | AAW    |      |    |            |     |                             |                               |      |
| 103       | FERMT3       | AAW    |      |    |            |     |                             |                               |      |
| 103       | CMTM7        | AAW    |      |    |            |     |                             |                               |      |
| 103       | LRRC25       | AAW    |      |    |            |     |                             |                               |      |
| 103       | C17orf87     | AAW    |      |    |            |     |                             |                               |      |
| Module ID | Gene Symbol  | Tissue | eQTL | TF | Key Driver | CAD | Candidate gene in GWAS for: |                               |      |
|           |              |        |      |    |            |     | Plasma glucose metabolism   | Plasma cholesterol metabolism | T2DM |
| 112       | ADRA1D       | AAW    |      |    |            |     |                             |                               |      |
| 112       | LOC100287428 | AAW    |      |    |            |     |                             |                               |      |
| 112       | ENPP5        | AAW    |      |    |            |     |                             |                               |      |
| 112       | ABCB4        | IMA    |      |    |            |     |                             |                               |      |
| 112       | CSorf47      | IMA    |      |    |            |     |                             |                               |      |
| 112       | ZCWPW2       | IMA    |      |    |            |     |                             |                               |      |
| 112       | HIST1H1D     | IMA    |      |    |            |     |                             |                               |      |
| 112       | NRN1         | IMA    |      |    |            |     |                             |                               |      |
| 112       | GBP3         | IMA    | X    |    |            |     |                             |                               |      |
| 112       | BTBD16       | IMA    | X    |    |            |     |                             |                               |      |
| 112       | C1orf110     | IMA    |      |    |            |     |                             |                               |      |
| 112       | CETP         | Liver  |      |    |            |     |                             | X                             |      |
| 112       | LDLR         | Liver  |      |    |            | X   |                             | X                             |      |
| 112       | CR1          | Liver  |      |    |            |     |                             |                               |      |
| 112       | CFP          | Liver  |      |    |            |     |                             |                               |      |
| 112       | SIGLEC10     | Liver  |      |    |            |     |                             |                               |      |
| 112       | CCR1         | Liver  |      |    |            |     |                             |                               |      |
| 112       | EMR1         | Liver  | X    |    | X          |     |                             |                               |      |
| 112       | KCNJ10       | Liver  |      |    |            |     |                             |                               |      |
| 112       | GPR65        | Liver  |      |    |            |     |                             |                               |      |
| 112       | CYSLTR1      | Liver  |      |    |            |     |                             |                               |      |
| 112       | MARCO        | Liver  |      |    |            |     |                             |                               |      |
| 112       | CXCR2P1      | Liver  |      |    |            |     |                             |                               |      |
| 112       | ARL16        | Blood  | X    |    |            |     |                             |                               |      |
| 112       | C21orf15     | Blood  |      |    |            |     |                             |                               |      |
| 112       | CTLA4        | SM     |      |    |            |     |                             |                               |      |
| 112       | CPVL         | SM     |      |    |            |     |                             |                               |      |
| 112       | SNORD50A     | SM     |      |    |            |     |                             |                               |      |
| 112       | C14orf86     | SM     |      |    |            |     |                             |                               |      |
| 112       | JAKMIP2      | SF     |      |    |            |     |                             |                               |      |

| 112       | KANK4       | SF     |      |    |            |     |                             |                               |      |
|-----------|-------------|--------|------|----|------------|-----|-----------------------------|-------------------------------|------|
| 112       | GUSBP3      | SF     |      |    |            |     |                             |                               |      |
| 112       | SMAS        | SF     |      |    |            |     |                             |                               |      |
| 112       | SERTAD4     | VF     |      |    |            |     |                             |                               |      |
| 112       | GALNT14     | VF     |      |    |            |     |                             |                               |      |
| 112       | PRINS       | VF     | X    |    |            |     |                             |                               |      |
| 112       | NCRNA00241  | VF     |      |    |            |     |                             |                               |      |
| 112       | HCG27       | VF     | X    |    | X          |     |                             |                               |      |
| 112       | C15orf28    | VF     |      |    |            |     |                             |                               |      |
| 112       | C22orf34    | VF     |      |    |            |     |                             |                               |      |
| Module ID | Gene Symbol | Tissue | eQTL | TF | Key Driver | CAD | Candidate gene in GWAS for: |                               |      |
|           |             |        |      |    |            |     | Plasma glucose metabolism   | Plasma cholesterol metabolism | T2DM |
| 128       | IFIT1       | Liver  |      |    |            |     |                             |                               |      |
| 128       | IFI44       | Liver  |      |    |            |     |                             |                               |      |
| 128       | SERPINC1    | Blood  |      |    |            |     |                             |                               |      |
| 128       | EPST11      | Blood  |      |    |            |     |                             |                               |      |
| 128       | TRIM6       | Blood  |      |    |            |     |                             |                               |      |
| 128       | IFIT3       | Blood  |      |    |            |     |                             |                               |      |
| 128       | OAS1        | Blood  | X    |    |            |     |                             |                               |      |
| 128       | OAS2        | Blood  |      |    |            |     |                             |                               |      |
| 128       | SPATS2L     | Blood  |      |    |            |     |                             |                               |      |
| 128       | LY6E        | Blood  |      |    |            |     |                             |                               |      |
| 128       | IFI27       | Blood  | X    |    |            |     |                             |                               |      |
| 128       | EIF2AK2     | Blood  |      |    |            |     |                             |                               |      |
| 128       | MX1         | Blood  | X    |    |            |     |                             |                               |      |
| 128       | IFIT1       | Blood  |      |    |            |     |                             |                               |      |
| 128       | IFI6        | Blood  |      |    |            |     |                             |                               |      |
| 128       | OASL        | Blood  |      | X  | X          |     |                             |                               |      |
| 128       | OTOF        | Blood  |      |    |            |     |                             |                               |      |
| 128       | ISG15       | Blood  |      |    |            |     |                             |                               |      |
| 128       | CCL8        | Blood  | X    |    | X          |     |                             |                               |      |
| 128       | OAS3        | Blood  |      |    |            |     |                             |                               |      |
| 128       | IFI44       | Blood  |      |    |            |     |                             |                               |      |
| 128       | IFI44L      | Blood  |      |    |            |     |                             |                               |      |
| 128       | LAMP3       | Blood  |      |    |            |     |                             |                               |      |
| 128       | LAP3        | Blood  | X    |    |            |     |                             |                               |      |
| 128       | HERC5       | Blood  |      |    |            |     |                             |                               |      |
| 128       | USP18       | Blood  |      |    |            |     |                             |                               |      |
| 128       | XAF1        | Blood  |      |    |            |     |                             |                               |      |
| 128       | IFITM3      | Blood  |      |    |            |     |                             |                               |      |
| 128       | PLSCR1      | Blood  |      |    |            |     |                             |                               |      |
| 128       | SIGLEC1     | Blood  |      |    |            |     |                             |                               |      |
| 128       | RSAD2       | Blood  |      |    |            |     |                             |                               |      |
| 128       | CMPK2       | Blood  |      |    |            |     |                             |                               |      |
| 128       | IFI6        | SF     |      |    |            |     |                             |                               |      |
| Module ID | Gene Symbol | Tissue | eQTL | TF | Key Driver | CAD | Candidate gene in GWAS for: |                               |      |
|           |             |        |      |    |            |     | Plasma glucose metabolism   | Plasma cholesterol metabolism | T2DM |
| 144       | CYBB        | Liver  |      |    |            |     |                             |                               |      |
| 144       | C1QB        | Liver  |      |    |            |     |                             |                               |      |
| 144       | FCGR3A      | Liver  |      |    |            |     |                             |                               |      |
| 144       | FOLR2       | Liver  |      |    |            |     |                             |                               |      |
| 144       | FCGR2B      | Liver  |      |    |            |     |                             |                               |      |
| 144       | LILRB4      | Liver  |      |    |            |     |                             |                               |      |
| 144       | LILRB5      | Liver  |      |    |            |     |                             |                               |      |
| 144       | CD33        | Liver  |      |    |            |     |                             |                               |      |
| 144       | GPR34       | Liver  |      |    |            |     |                             |                               |      |
| 144       | VSIG4       | Liver  |      |    |            |     |                             |                               |      |
| 144       | C1QC        | Liver  |      |    |            |     |                             |                               |      |
| 144       | PLAC8       | Liver  |      |    |            |     |                             |                               |      |
| 144       | LPAR5       | Liver  |      |    |            |     |                             |                               |      |
| 144       | TIMD4       | Liver  |      |    |            |     |                             | X                             |      |
| 144       | PLA2G7      | Liver  | X    |    |            |     |                             |                               |      |
| 144       | IL18        | Liver  |      |    |            |     |                             |                               |      |
| 144       | C3AR1       | Liver  |      |    |            |     |                             |                               |      |
| 144       | LY86        | Liver  | X    |    | X          |     |                             |                               |      |
| 144       | CD180       | Liver  |      |    |            |     |                             |                               |      |
| 144       | IGSF6       | Liver  |      |    |            |     |                             |                               |      |
| 144       | CDS1        | Liver  |      |    |            |     |                             |                               |      |
| 144       | PILRA       | Liver  |      |    |            |     |                             |                               |      |
| 144       | CPVL        | Liver  | X    |    | X          |     |                             |                               |      |
| 144       | MS4A4A      | Liver  |      |    |            |     |                             |                               |      |
| 144       | PDCD1LG2    | Liver  |      |    |            |     |                             |                               |      |
| 144       | HAVCR2      | Liver  |      |    |            |     |                             |                               |      |
| 144       | SPIC        | Liver  |      | X  |            |     |                             |                               |      |
| 144       | P2RY13      | Liver  |      |    |            |     |                             |                               |      |
| 144       | PIK3R3      | VF     |      |    |            |     |                             |                               |      |
| Module ID | Gene Symbol | Tissue | eQTL | TF | Key Driver | CAD | Candidate gene in GWAS for: |                               |      |
|           |             |        |      |    |            |     | Plasma glucose metabolism   | Plasma cholesterol metabolism | T2DM |
| 157       | ZNF429      | Liver  |      |    |            |     |                             |                               |      |
| 157       | ZNF37A      | Liver  |      | X  |            |     |                             |                               |      |
| 157       | DDX60L      | Liver  |      |    |            |     |                             |                               |      |
| 157       | ZNF493      | Liver  |      |    |            |     |                             |                               |      |

|     |          |       |   |   |   |  |  |  |  |
|-----|----------|-------|---|---|---|--|--|--|--|
| 157 | ZNF680   | Liver |   |   |   |  |  |  |  |
| 157 | SMC6     | Liver | X |   |   |  |  |  |  |
| 157 | NR1D2    | Liver |   | X |   |  |  |  |  |
| 157 | ZNF138   | Liver |   | X | X |  |  |  |  |
| 157 | ZNF91    | Liver |   | X |   |  |  |  |  |
| 157 | PIBF1    | Liver |   |   |   |  |  |  |  |
| 157 | KIAA1009 | Liver |   |   |   |  |  |  |  |
| 157 | ANKRD26  | Liver | X |   |   |  |  |  |  |
| 157 | ESF1     | Liver |   |   |   |  |  |  |  |
| 157 | THAP9    | Liver | X |   |   |  |  |  |  |
| 157 | PYROXD1  | Liver | X |   |   |  |  |  |  |
| 157 | HMGNS    | Liver |   | X |   |  |  |  |  |
| 157 | EFCAB7   | Liver | X |   |   |  |  |  |  |
| 157 | LRCC1    | Liver | X |   | X |  |  |  |  |
| 157 | SLC2A13  | Liver |   |   |   |  |  |  |  |
| 157 | TTC18    | Liver |   |   |   |  |  |  |  |
| 157 | ZNF441   | Liver |   |   |   |  |  |  |  |
| 157 | KLHDC1   | Liver |   |   |   |  |  |  |  |
| 157 | ZNF204P  | Liver |   |   |   |  |  |  |  |
| 157 | C2orf86  | SF    |   |   |   |  |  |  |  |

**ONLINE REFERENCES**

1. Franzen O, Ermel R, Cohain A, et al. Cardiometabolic risk loci share downstream cis- and trans-gene regulation across tissues and diseases. *Science* 2016;353:827-30.
2. Love MI, Huber W, Anders S. Moderated estimation of fold change and dispersion for RNA-seq data with DESeq2. *Genome Biol* 2014;15:550.
3. Leek JT, Johnson WE, Parker HS, Jaffe AE, Storey JD. The sva package for removing batch effects and other unwanted variation in high-throughput experiments. *Bioinformatics* 2012;28:882-3.
4. Nikpay M, Goel A, Won HH, et al. A comprehensive 1,000 Genomes-based genome-wide association meta-analysis of coronary artery disease. *Nat Genet* 2015;47:1121-30.
5. Nelson CP, Goel A, Butterworth AS, et al. Association analyses based on false discovery rate implicate new loci for coronary artery disease. *Nat Genet* 2017;49:1385-91.
6. Yang X, Peterson L, Thieringer R, et al. Identification and validation of genes affecting aortic lesions in mice. *J Clin Invest*;120:2414-22.
7. Talukdar HA, Foroughi Asl H, Jain RK, et al. Cross-Tissue Regulatory Gene Networks in Coronary Artery Disease. *Cell Syst* 2016;2:196-208.
8. Bennett BJ, Farber CR, Orozco L, et al. A high-resolution association mapping panel for the dissection of complex traits in mice. *Genome Res* 2010;20:281-90.
